# Supplementary material for: Genetic Diversity and Identification of Vietnamese Paphiopedilum Species Using DNA Sequences
Source: MDPI journal article supplement (doi:10.3390/biology9010009), 2019-12-31

**Figure S5. Phylogenetic trees of 21 Vietnamese *Paphiopedilum* species based on *trnL* region using different methods.**

- (A) Neighbor-joining method in MEGA  
(B) Maximum Likelihood method in PAUP\*  
(C) Bayesian Inference method in MRBAYES  
(D) Maximum Parsimony method in PAUP\*  
(E) Maximum Likelihood method in MEGA  
Color samples: identified species. Black samples: unidentified species)

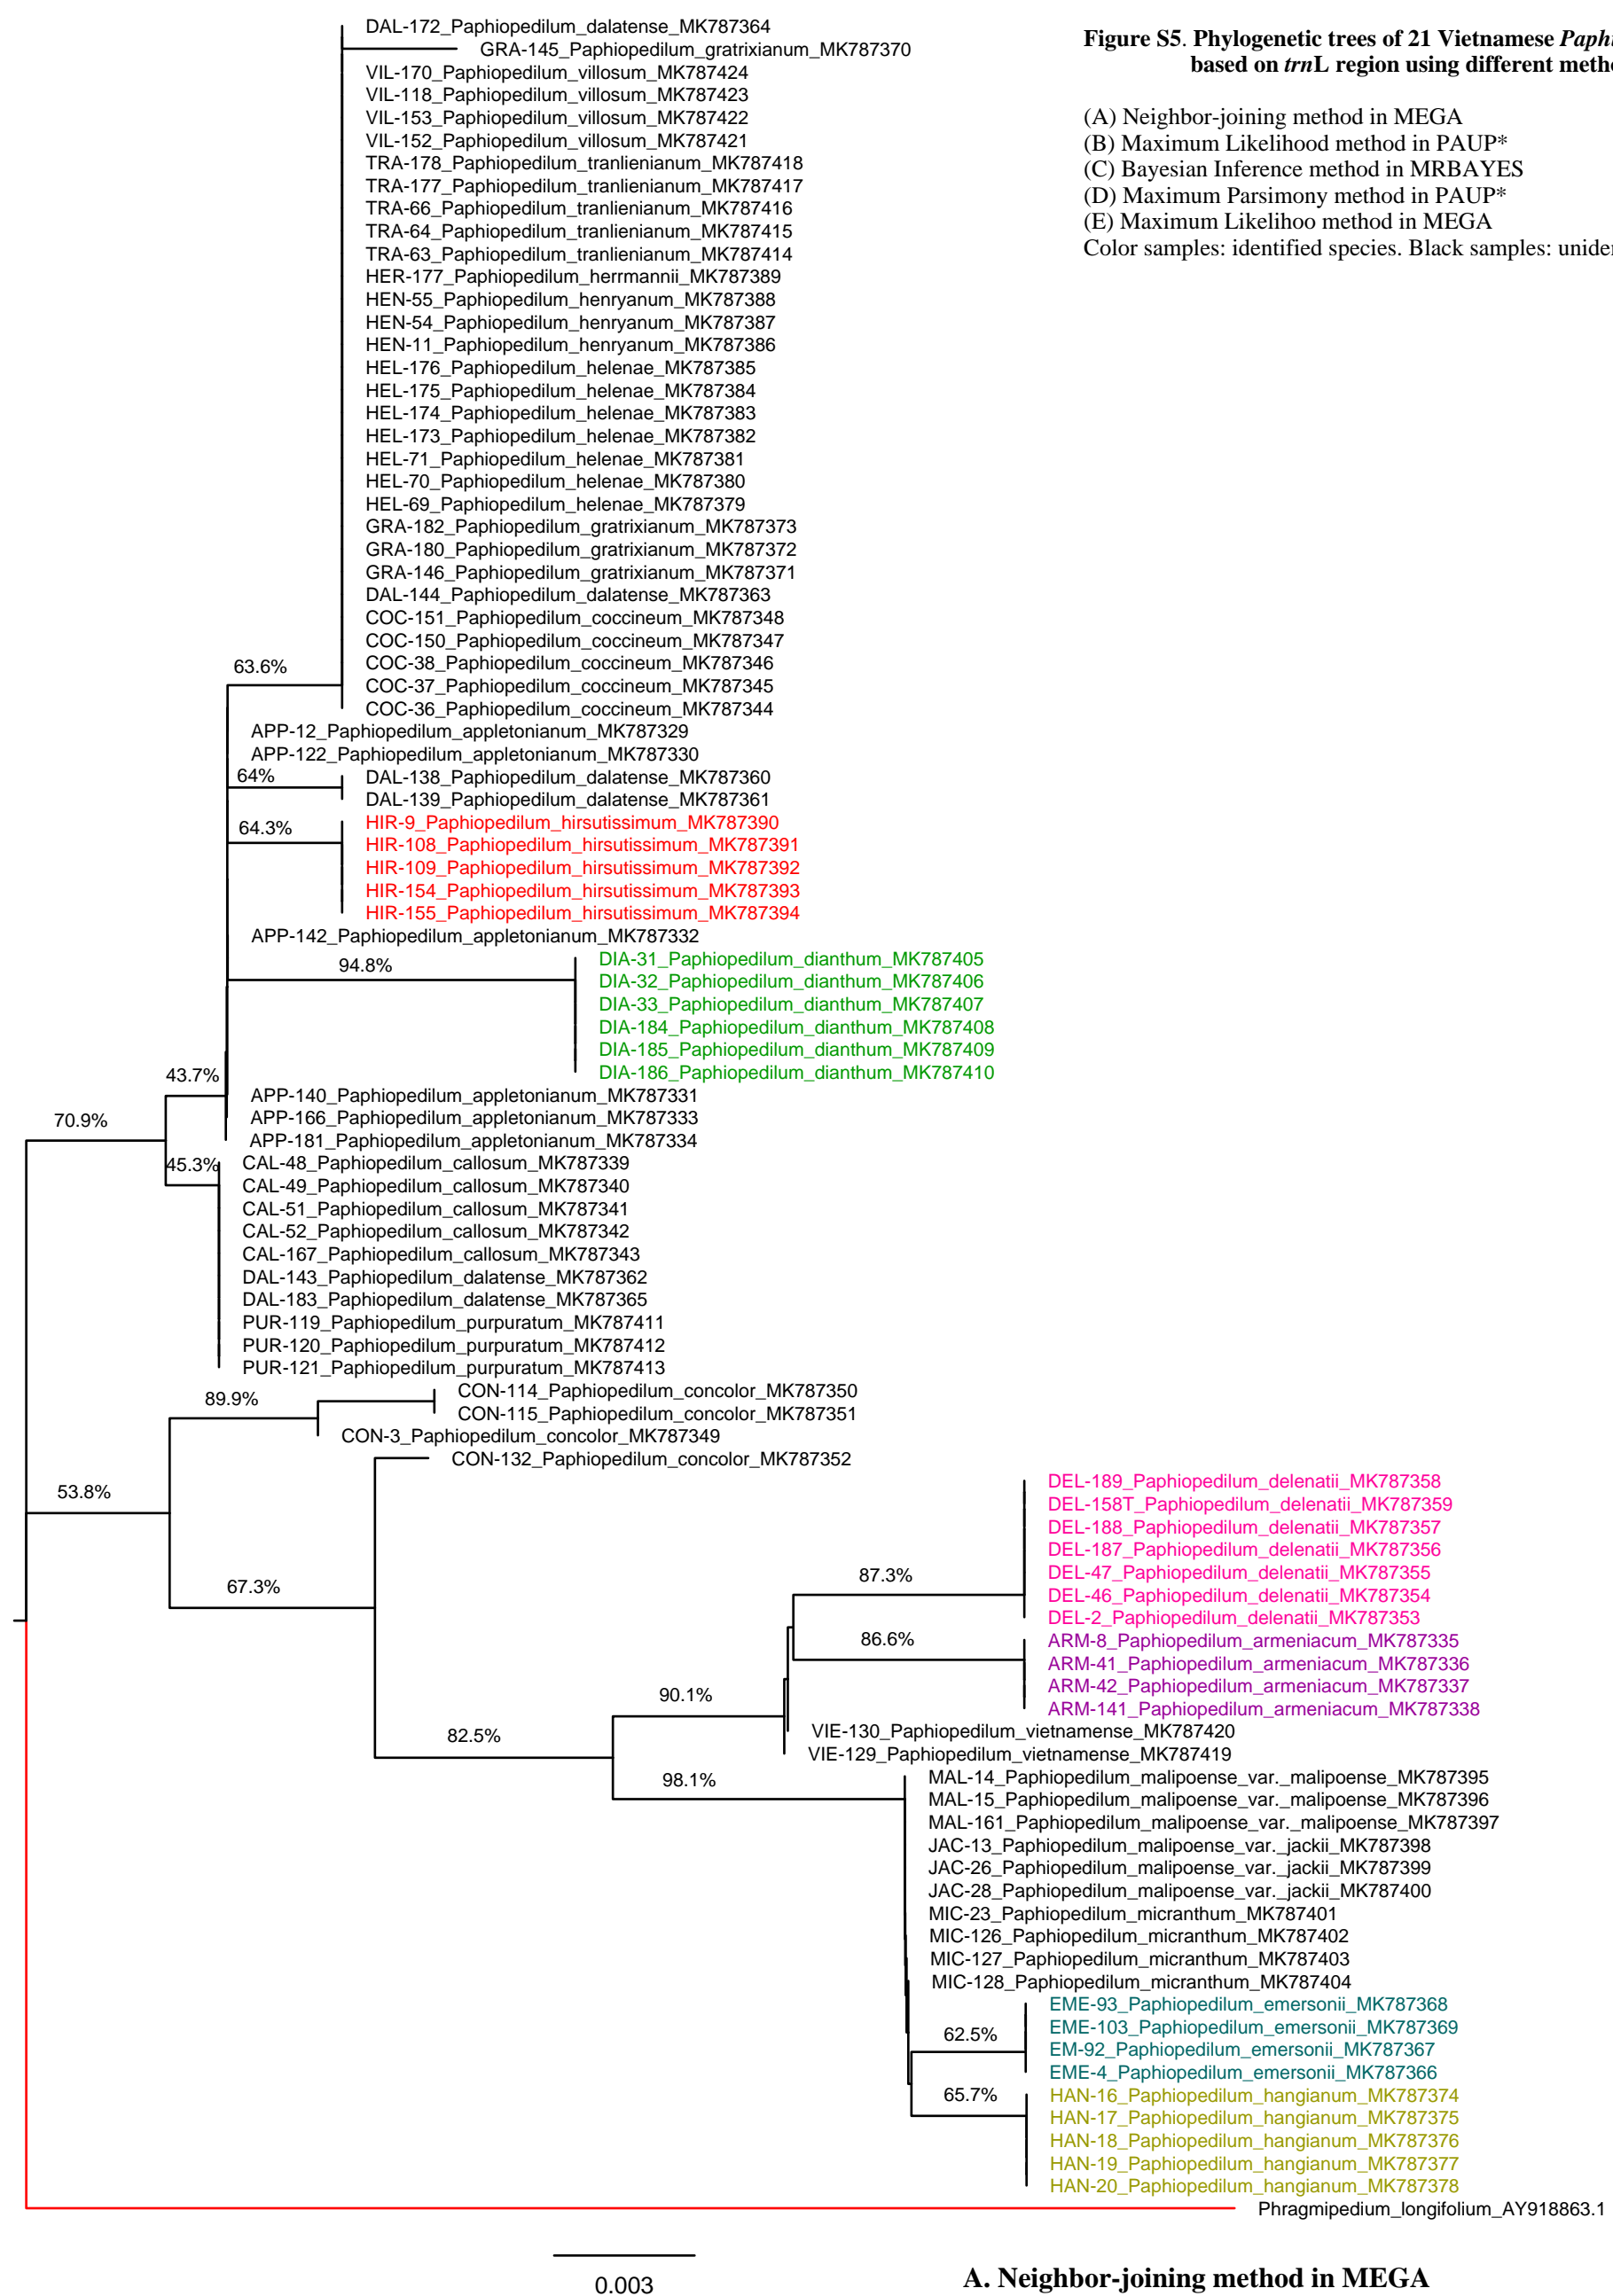

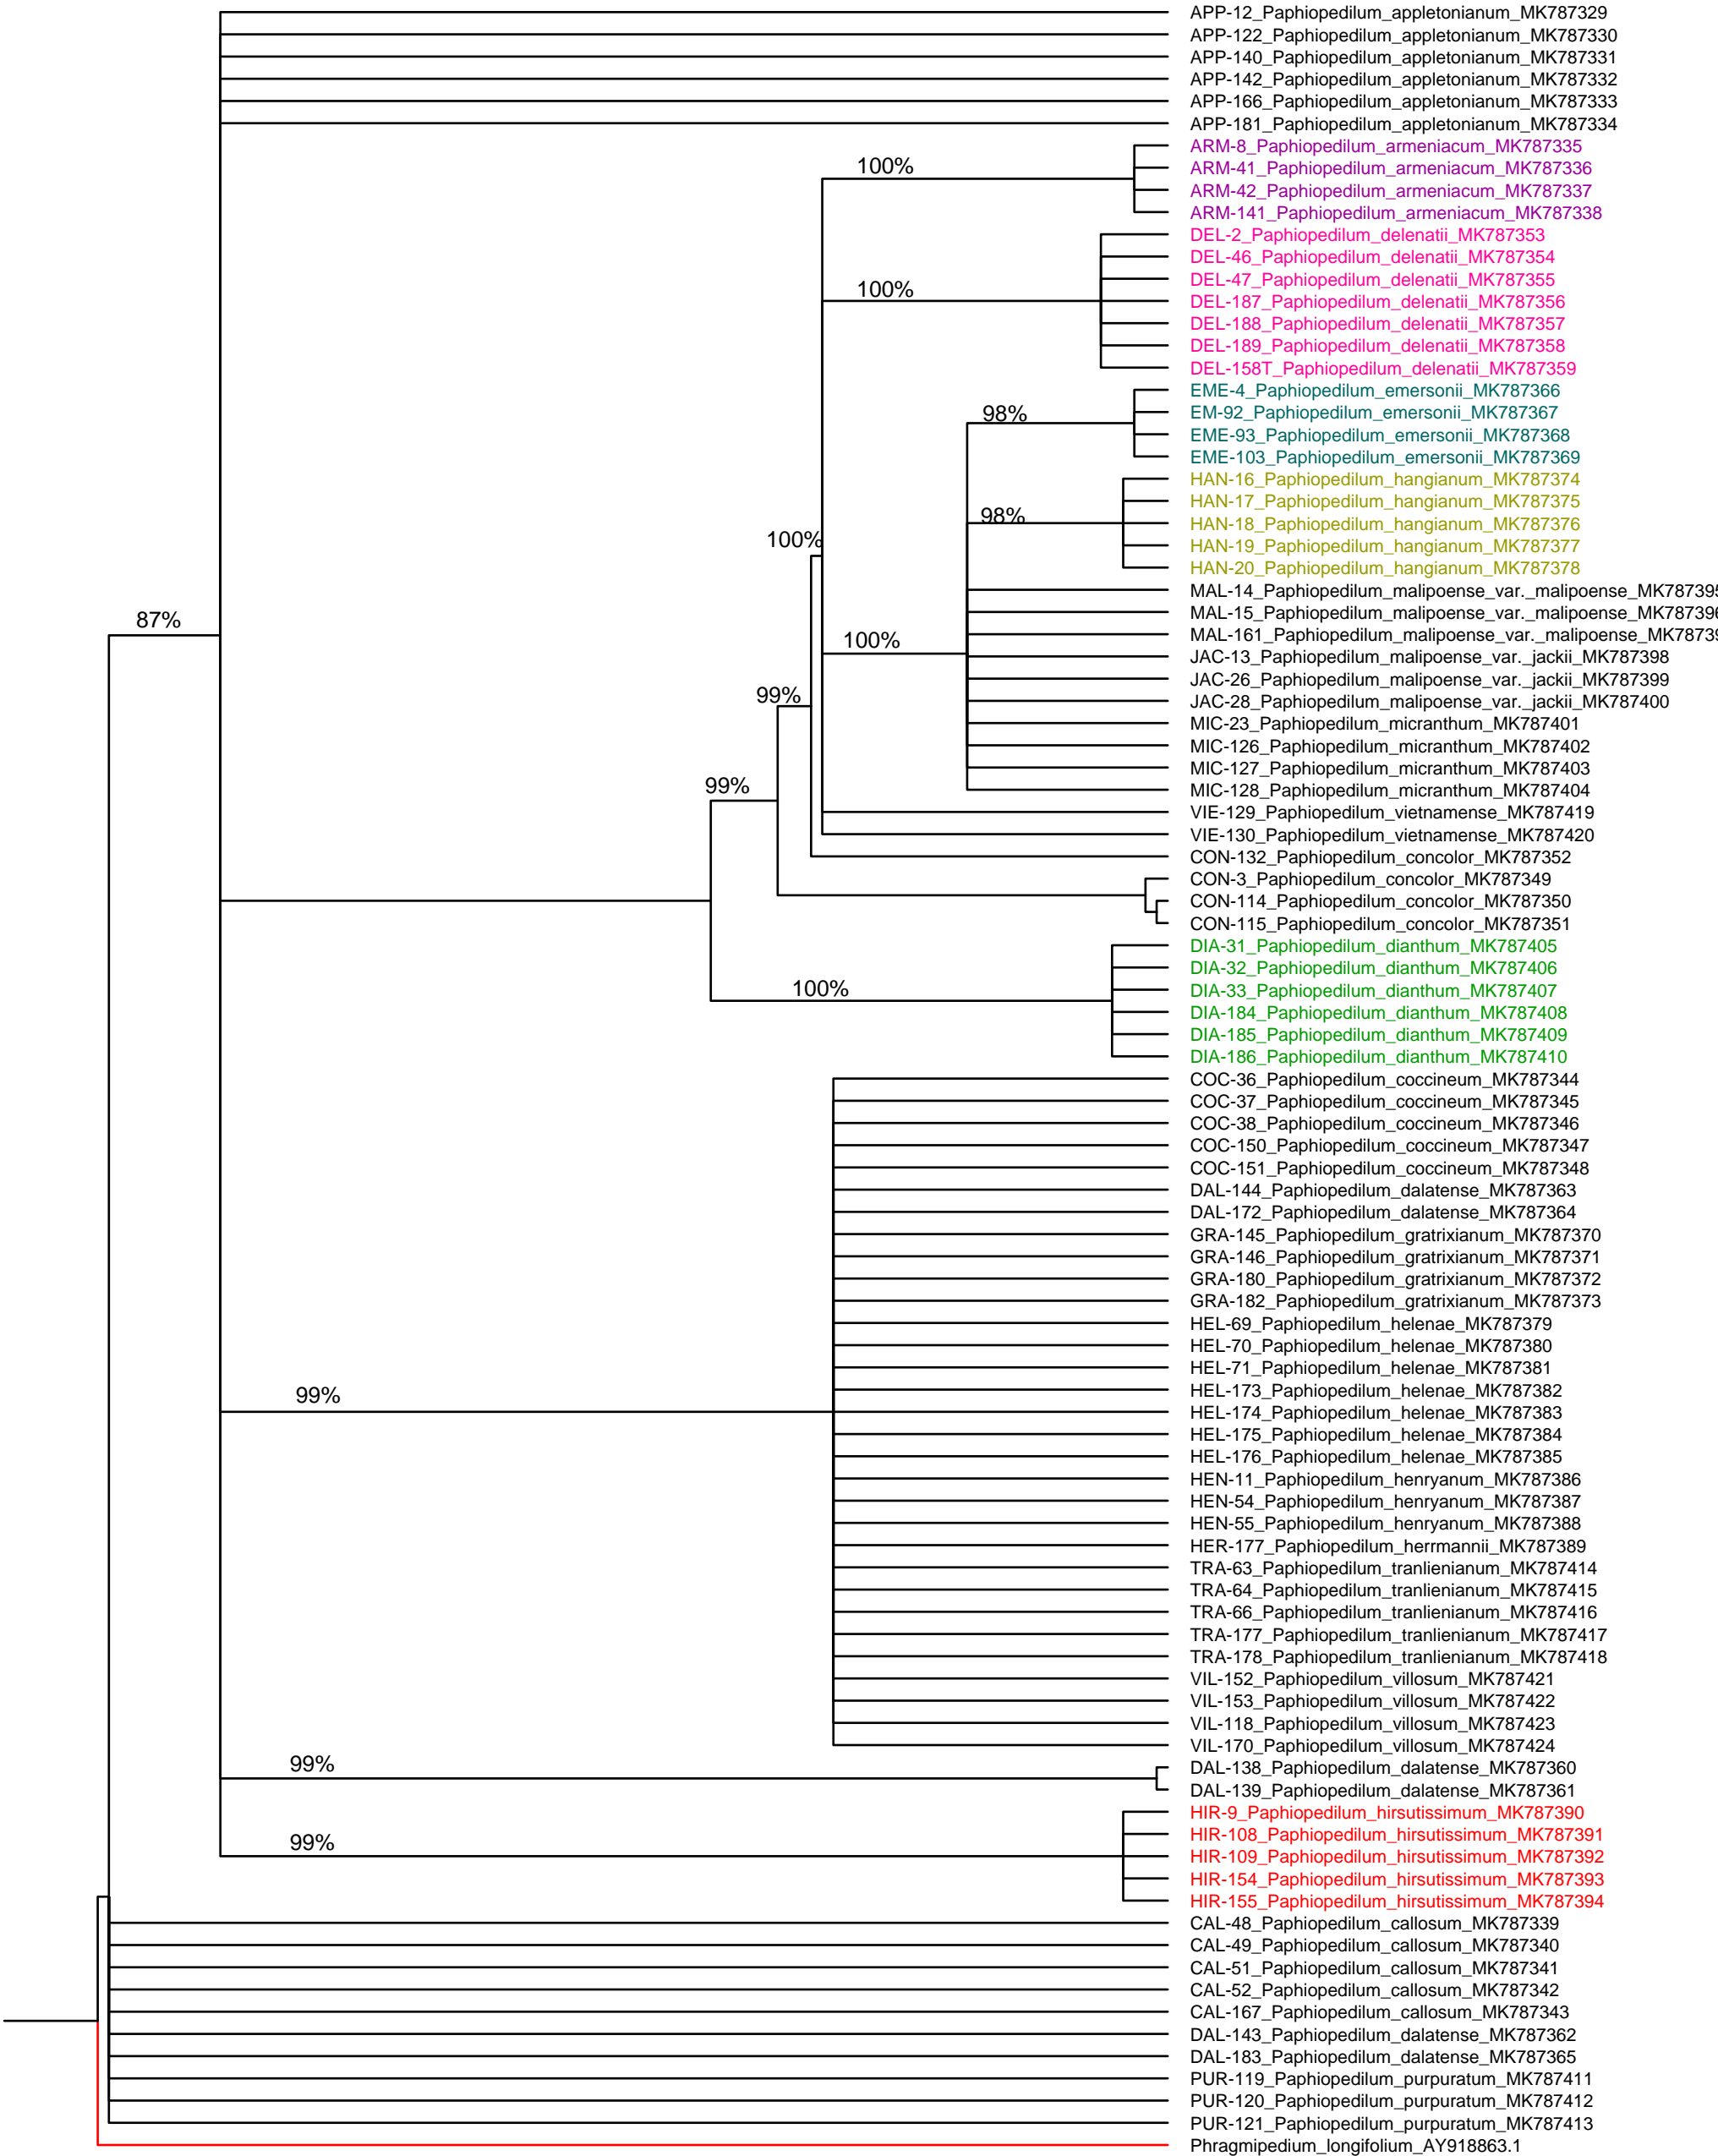

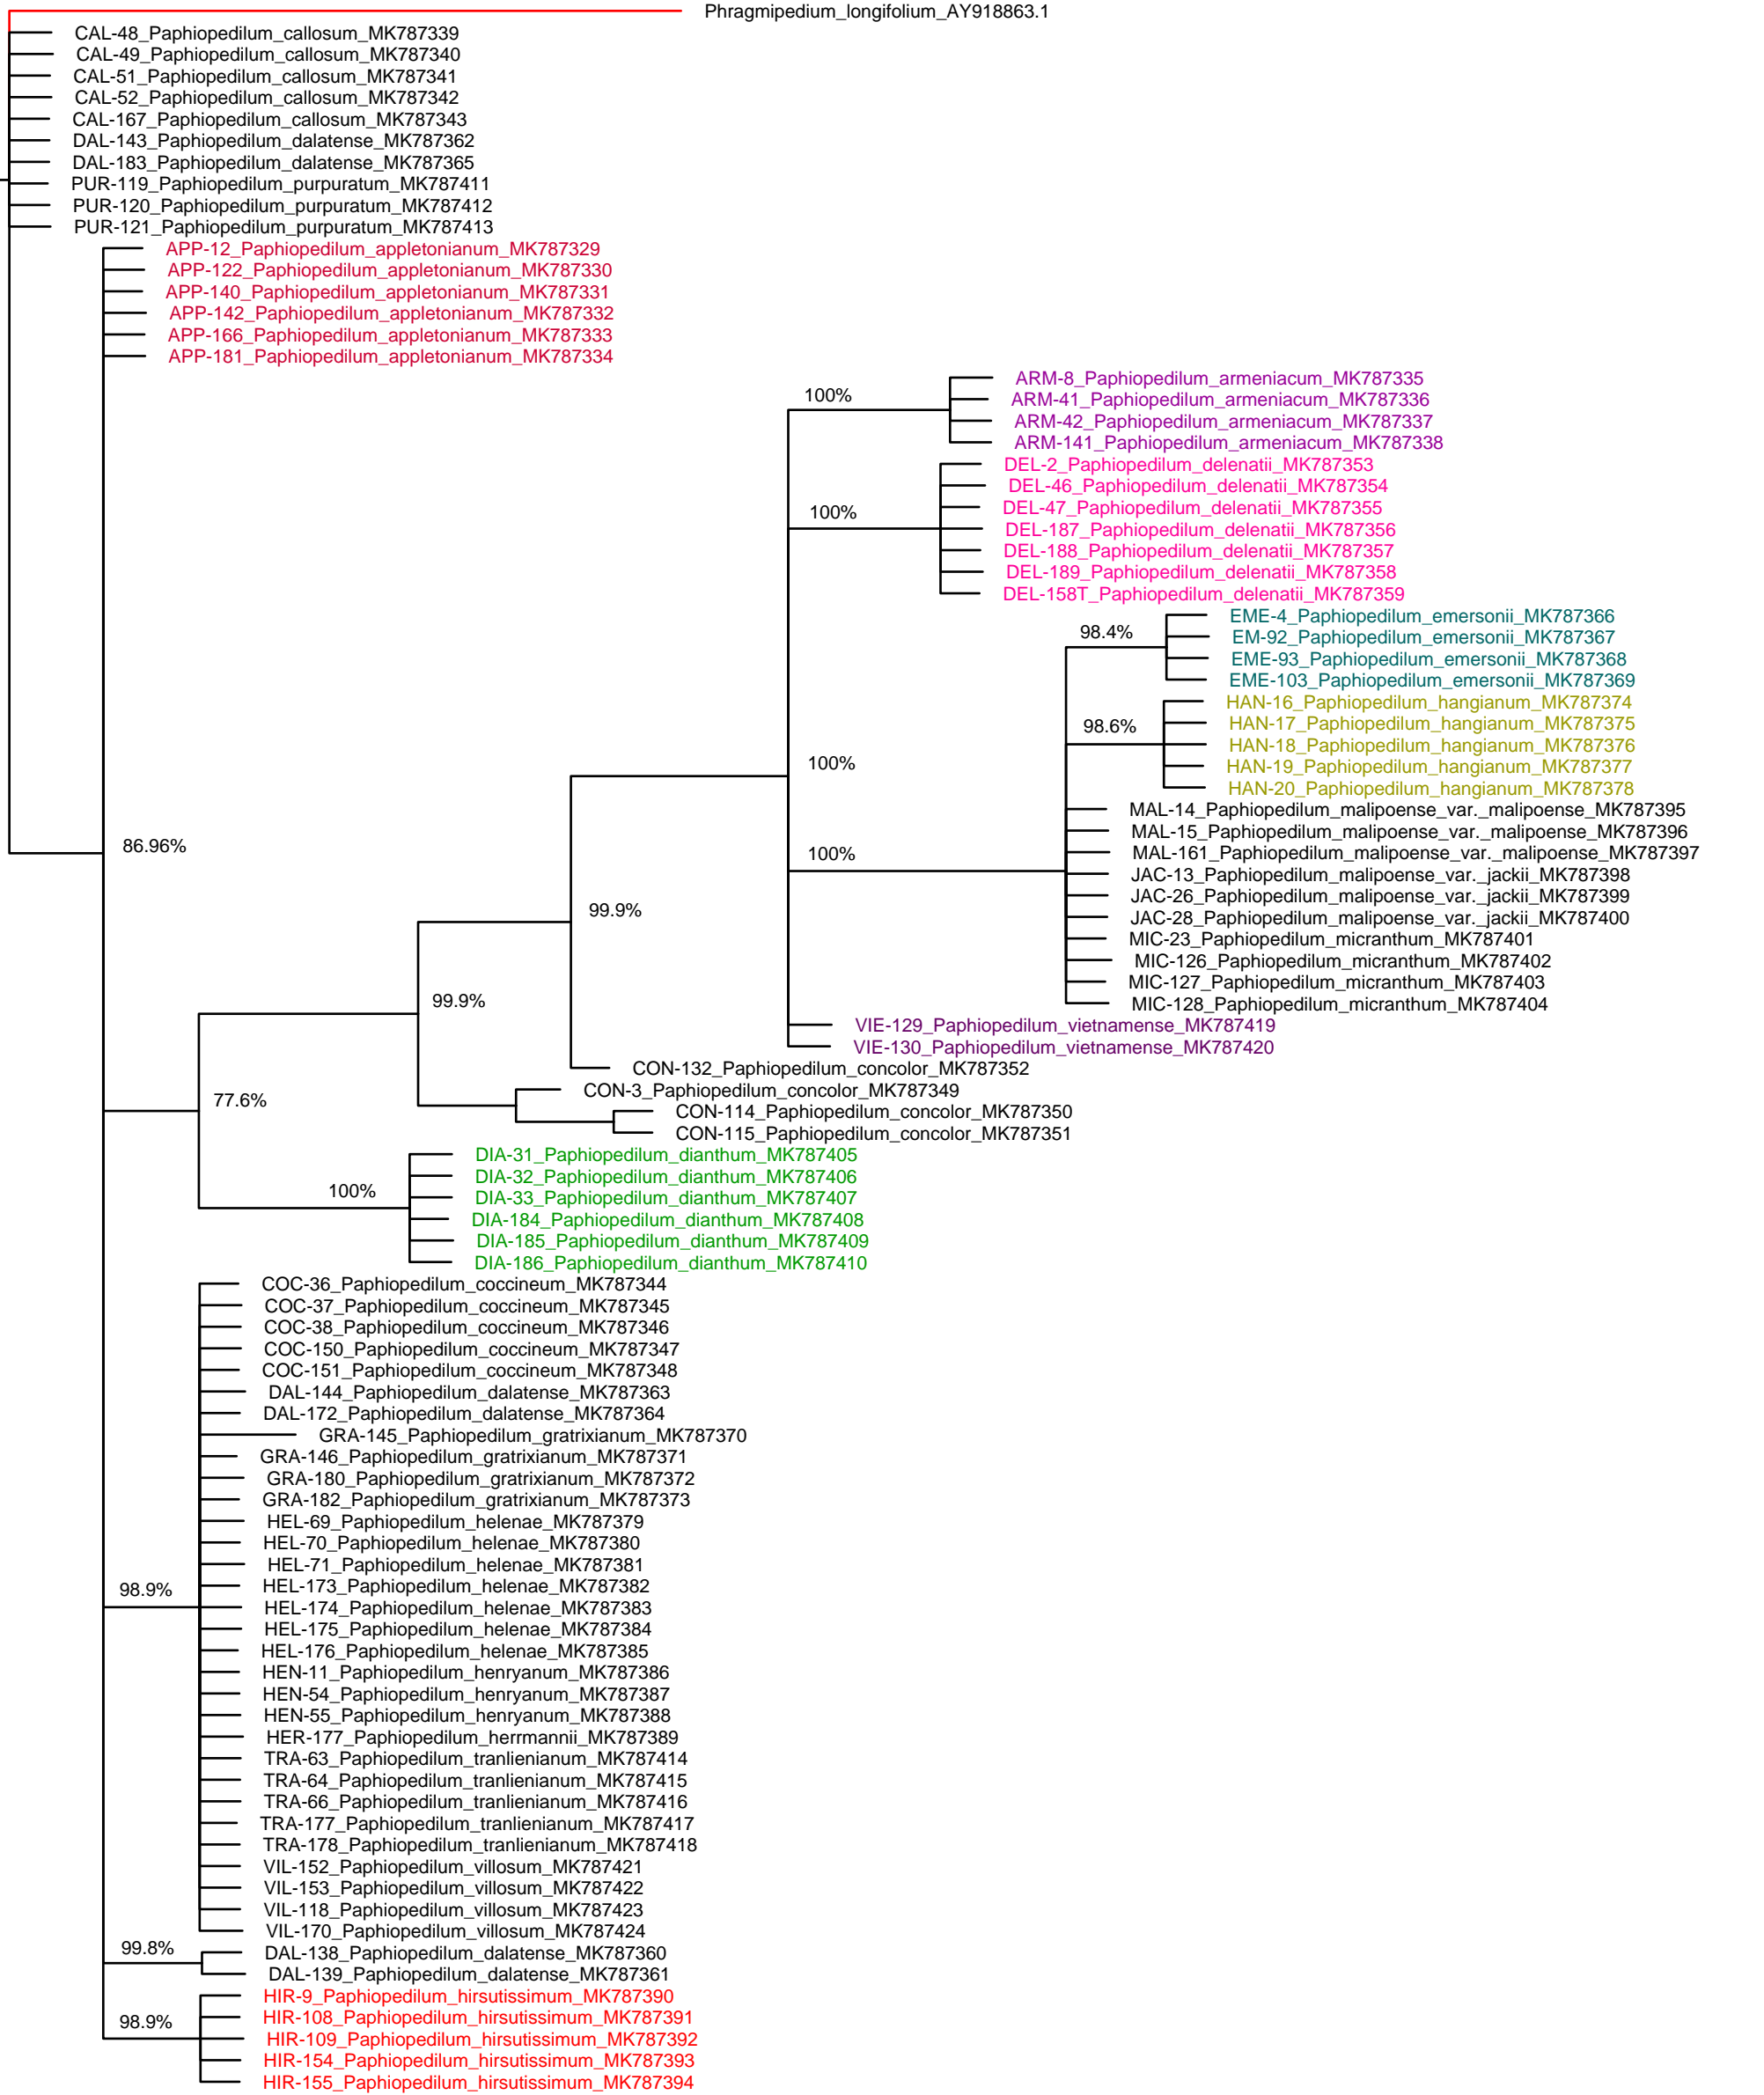

C. Bayesian Inference method in MRBAYES

9.0E-4

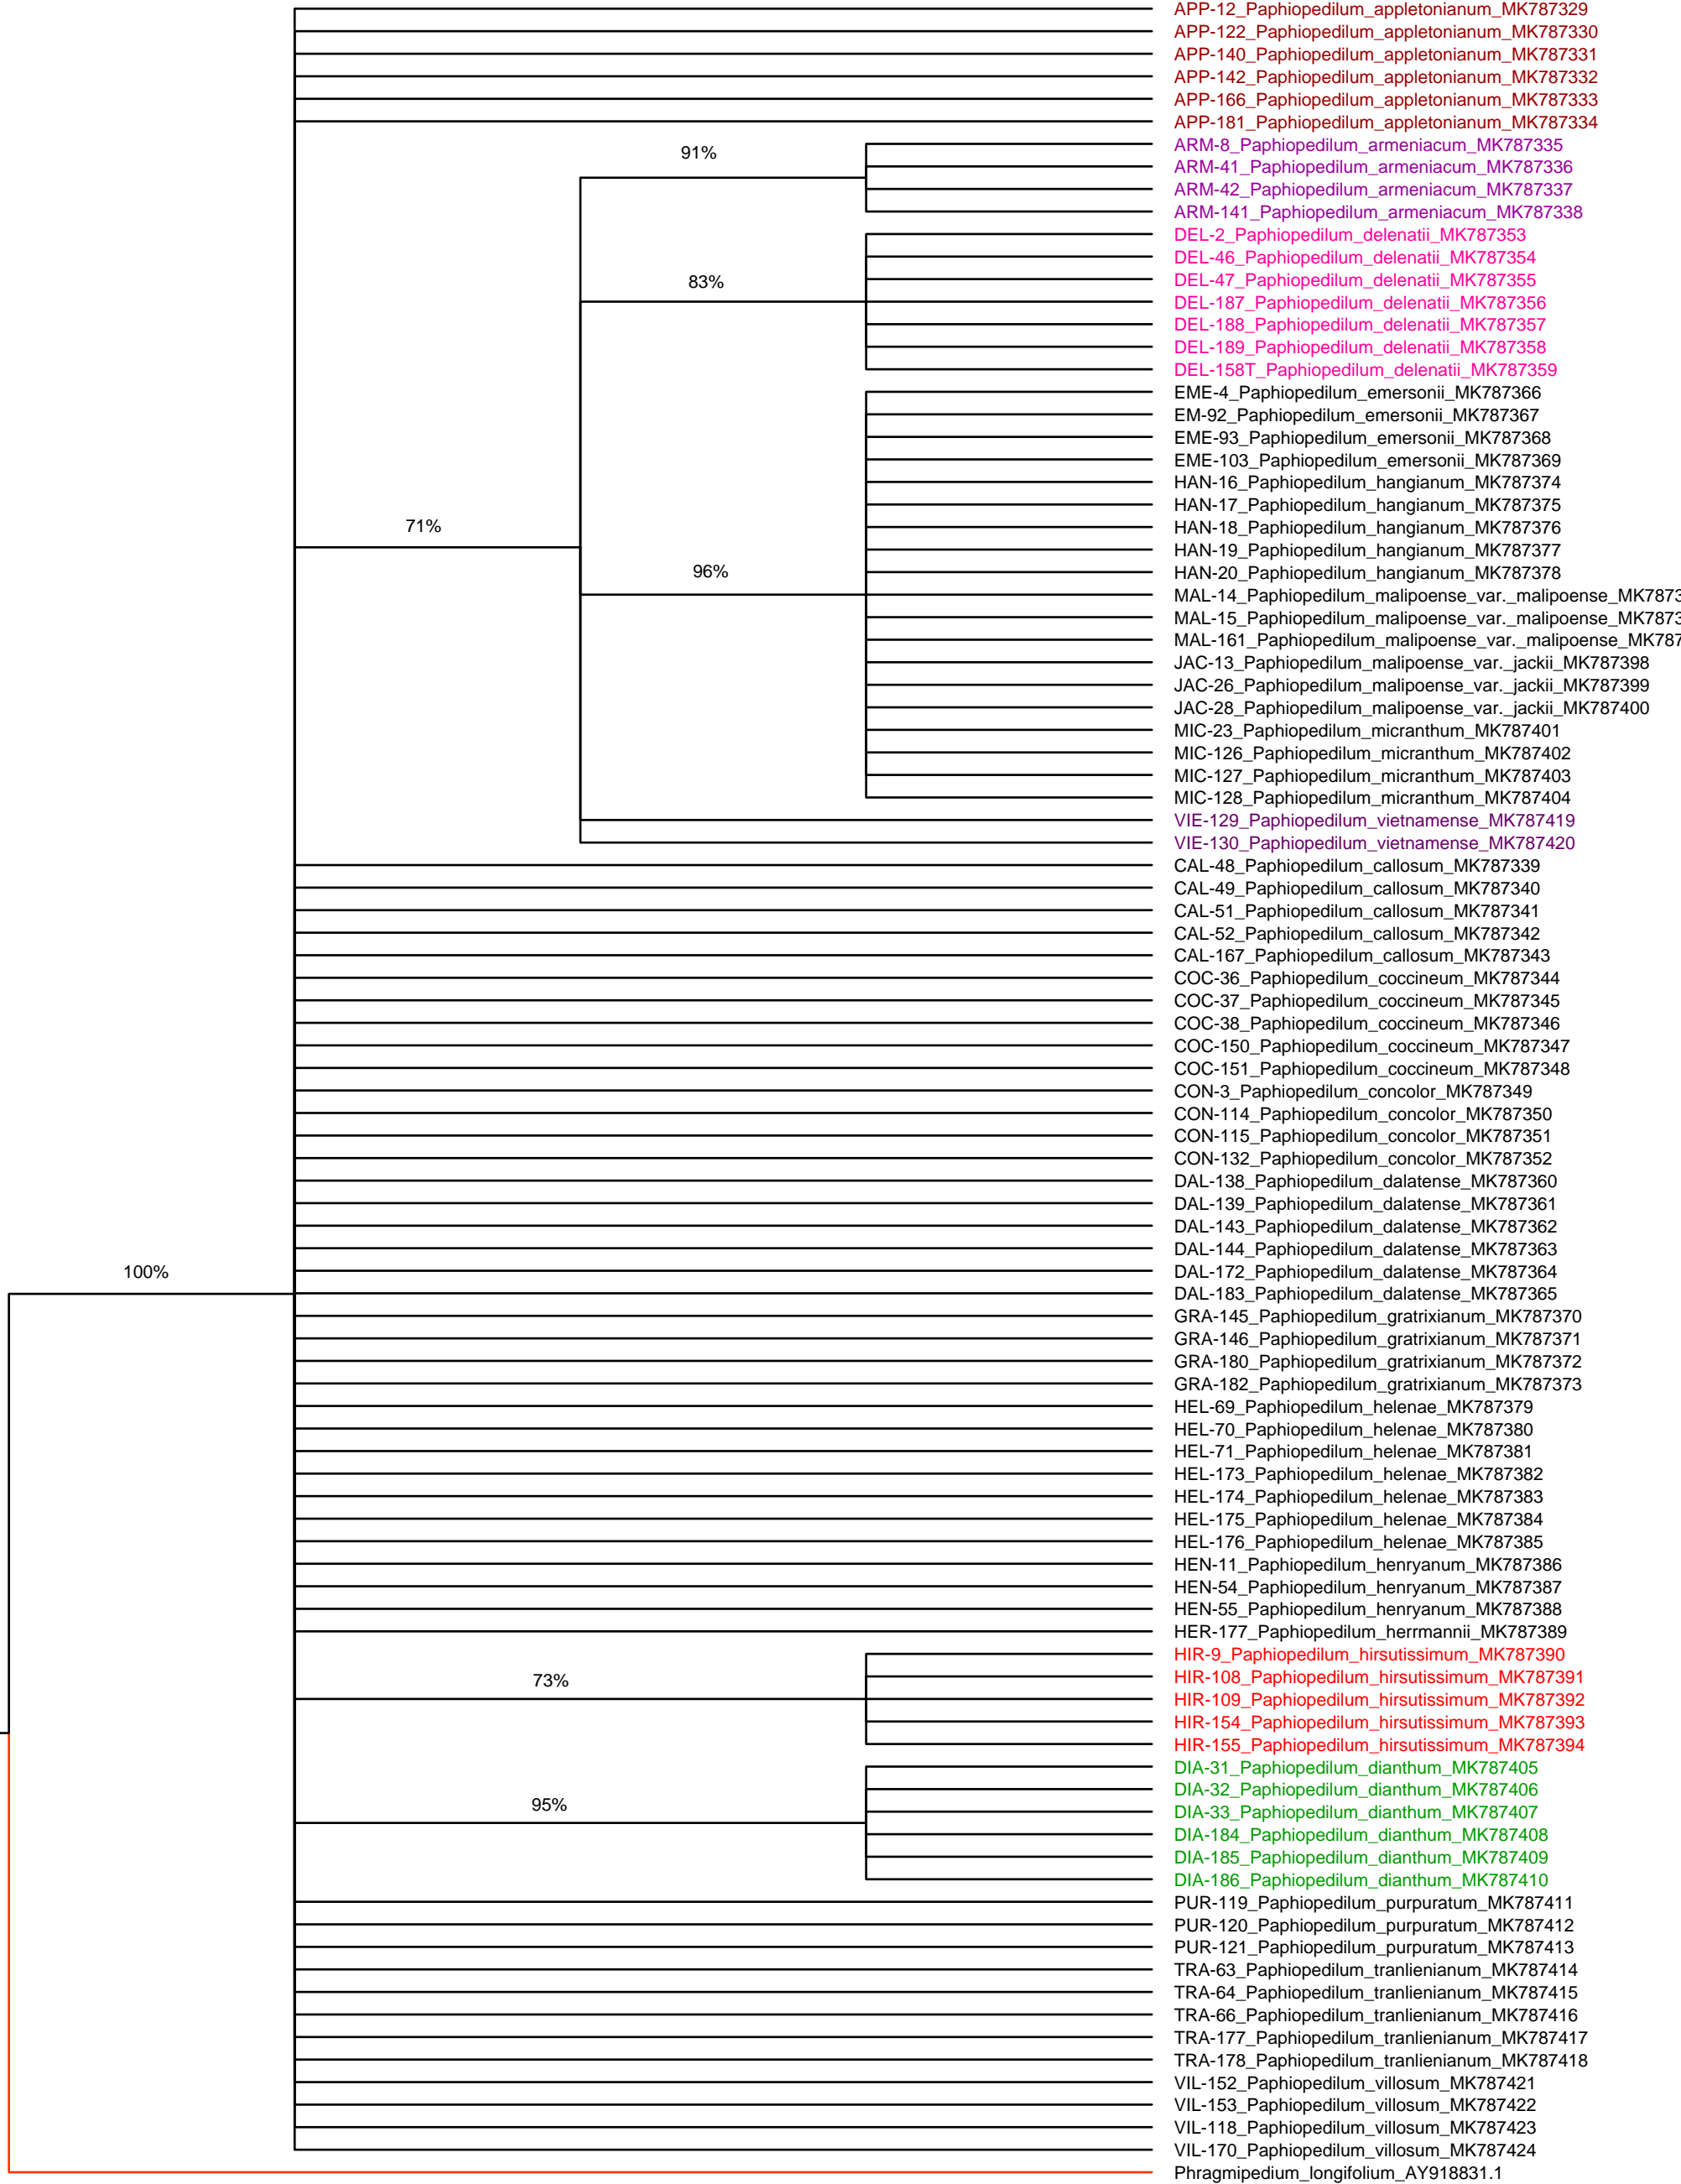

0.5

D. Maximum Parsimony in PAUP\*



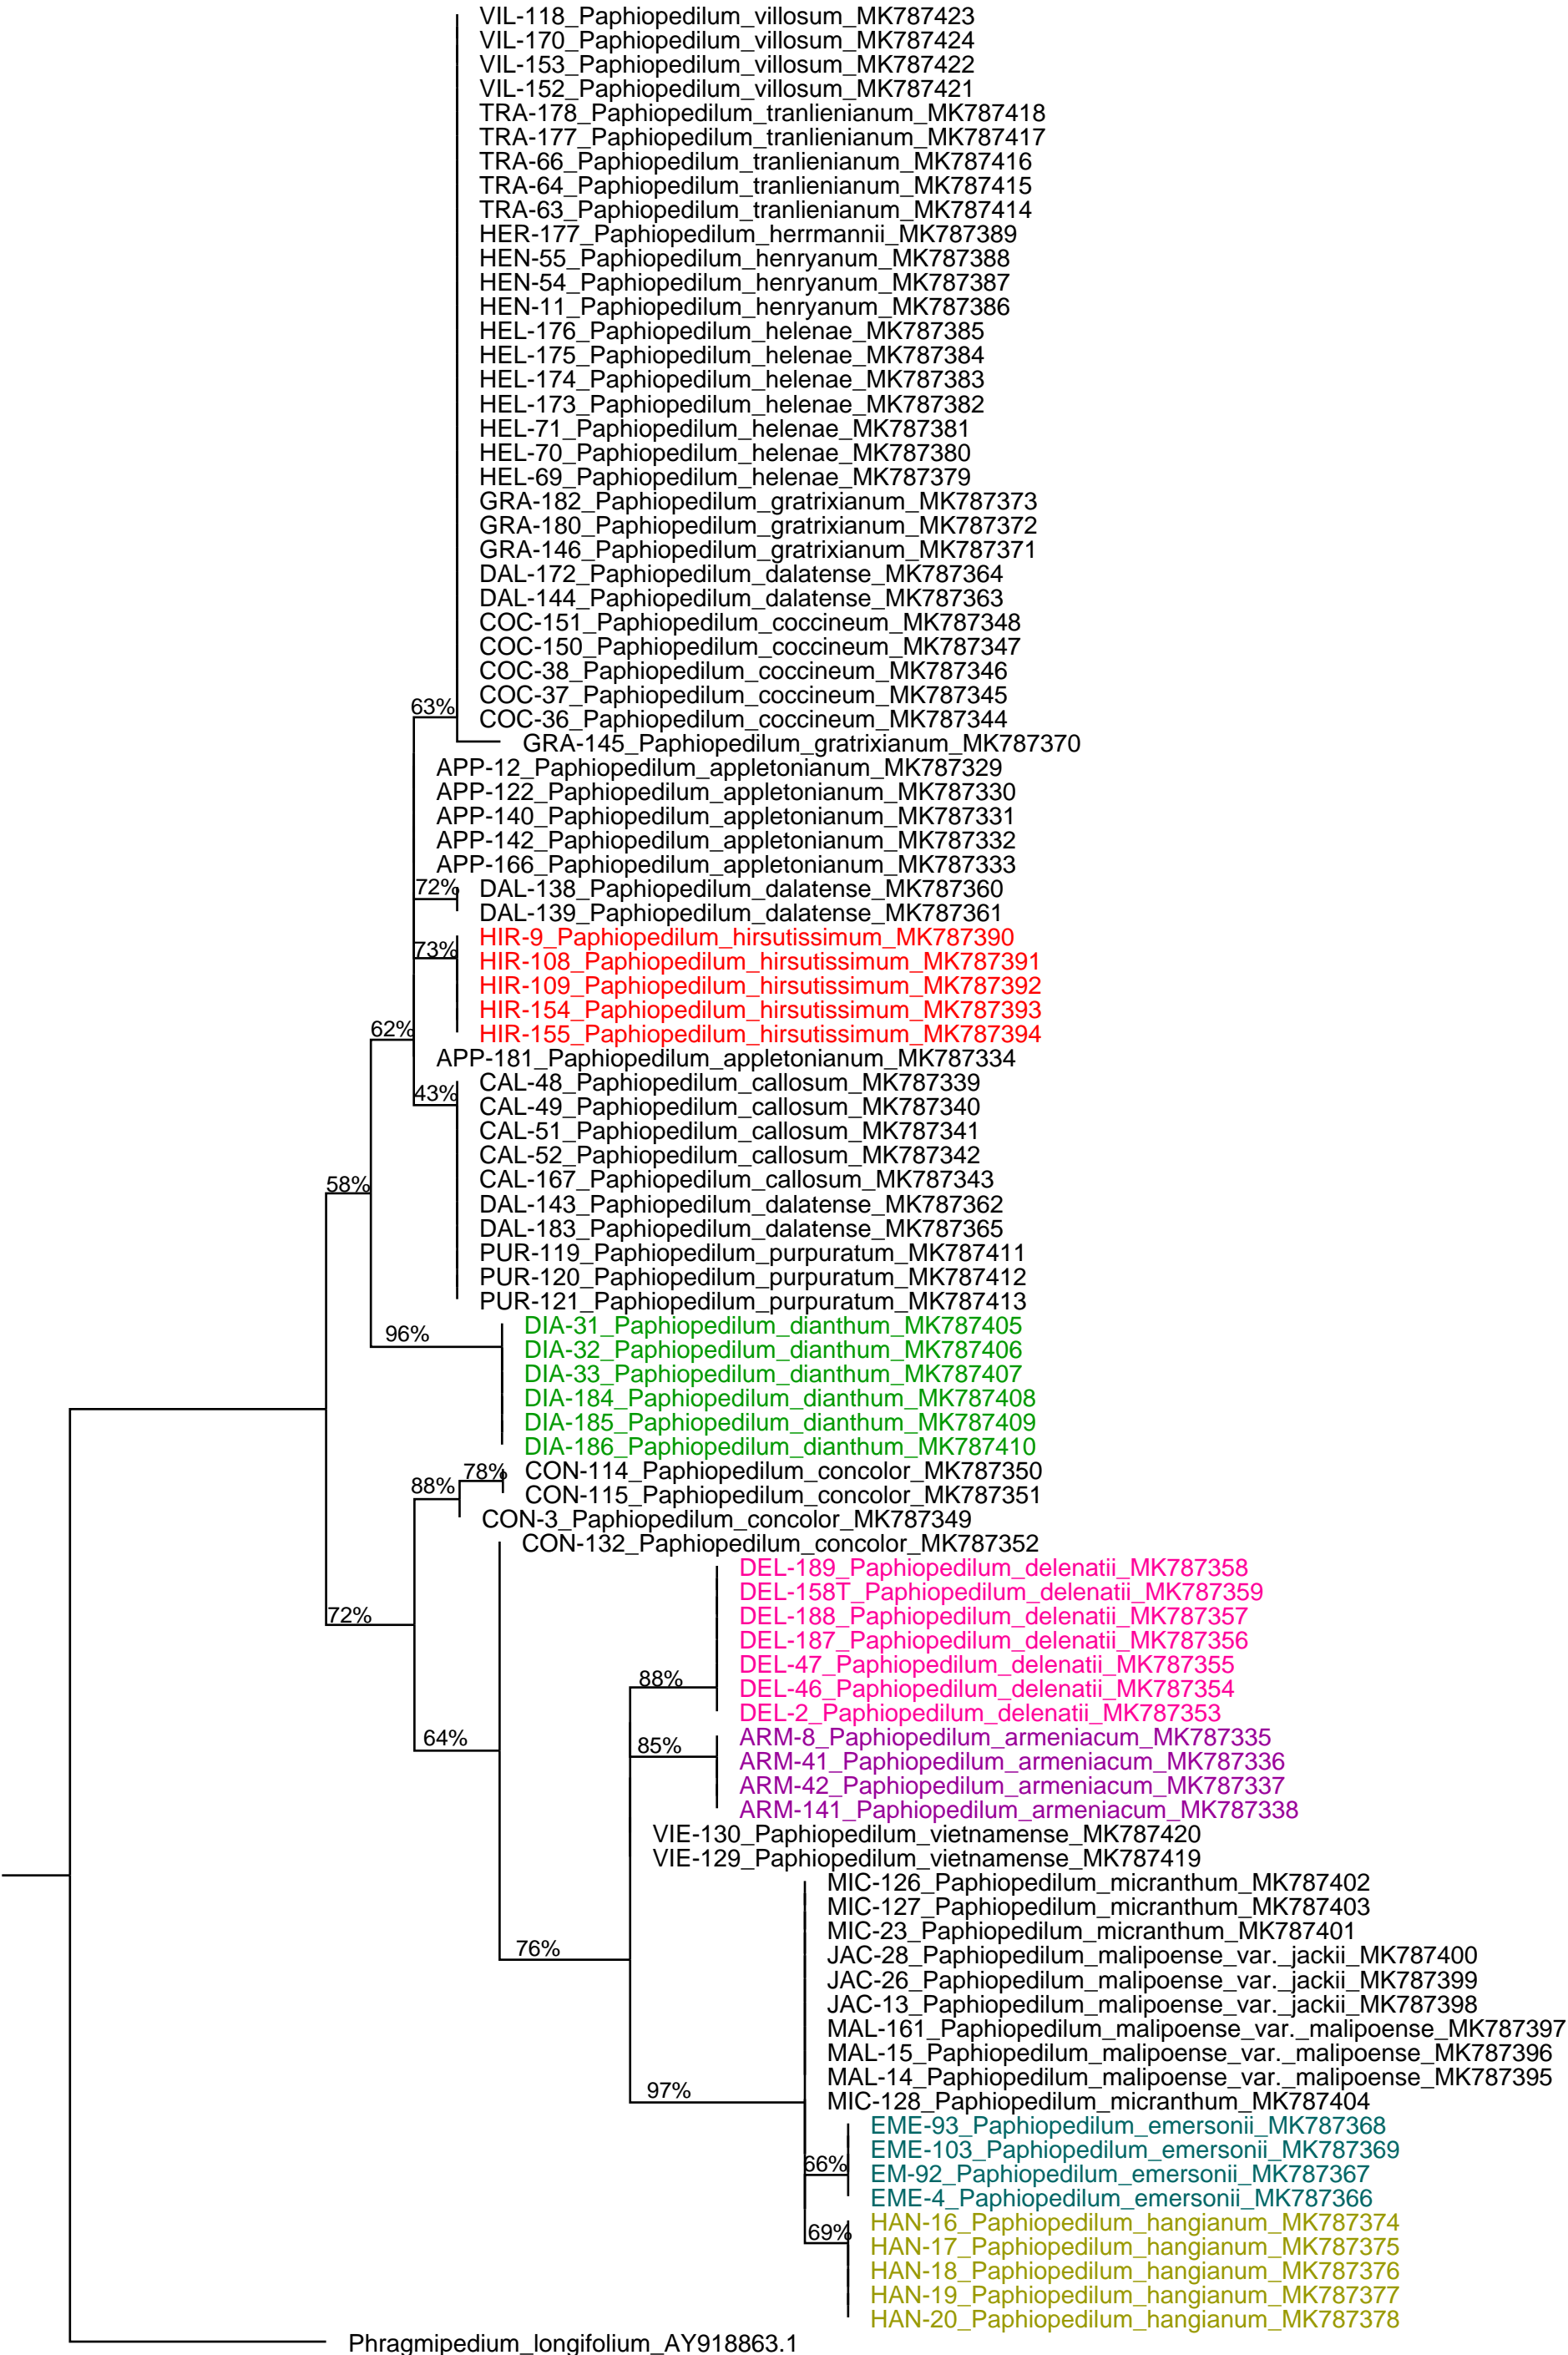

Supplement: s1 [file s1]
