# Supplementary material for: Genetic Diversity and Identification of Vietnamese Paphiopedilum Species Using DNA Sequences
Source: MDPI journal article supplement (doi:10.3390/biology9010009), 2019-12-31
Supplement: s1 [file s1]

**Figure S1.** Phylogenetic trees of 8 endemic *Paphiopedilum* species based on single and 2-locus combined sequences of ITS, *matK*, *trnL*, *rpoB*, *rpoC1*.  
(**A**) ITS; (**B**) *matK*; (**C**) *trnL*; (**D**) *rpoB*; (**E**) *rpoC1*; (**F**) *matK* + ITS;  
( **G**) *matK* + *trnL*; (**H**) *matK*+ *rpoB*; (**I**) *matK* + *rpoC1*, (**J**) ITS + *trnL*;  
( **K**) ITS + *rpoB*; (**L**) ITS + *rpoC1*

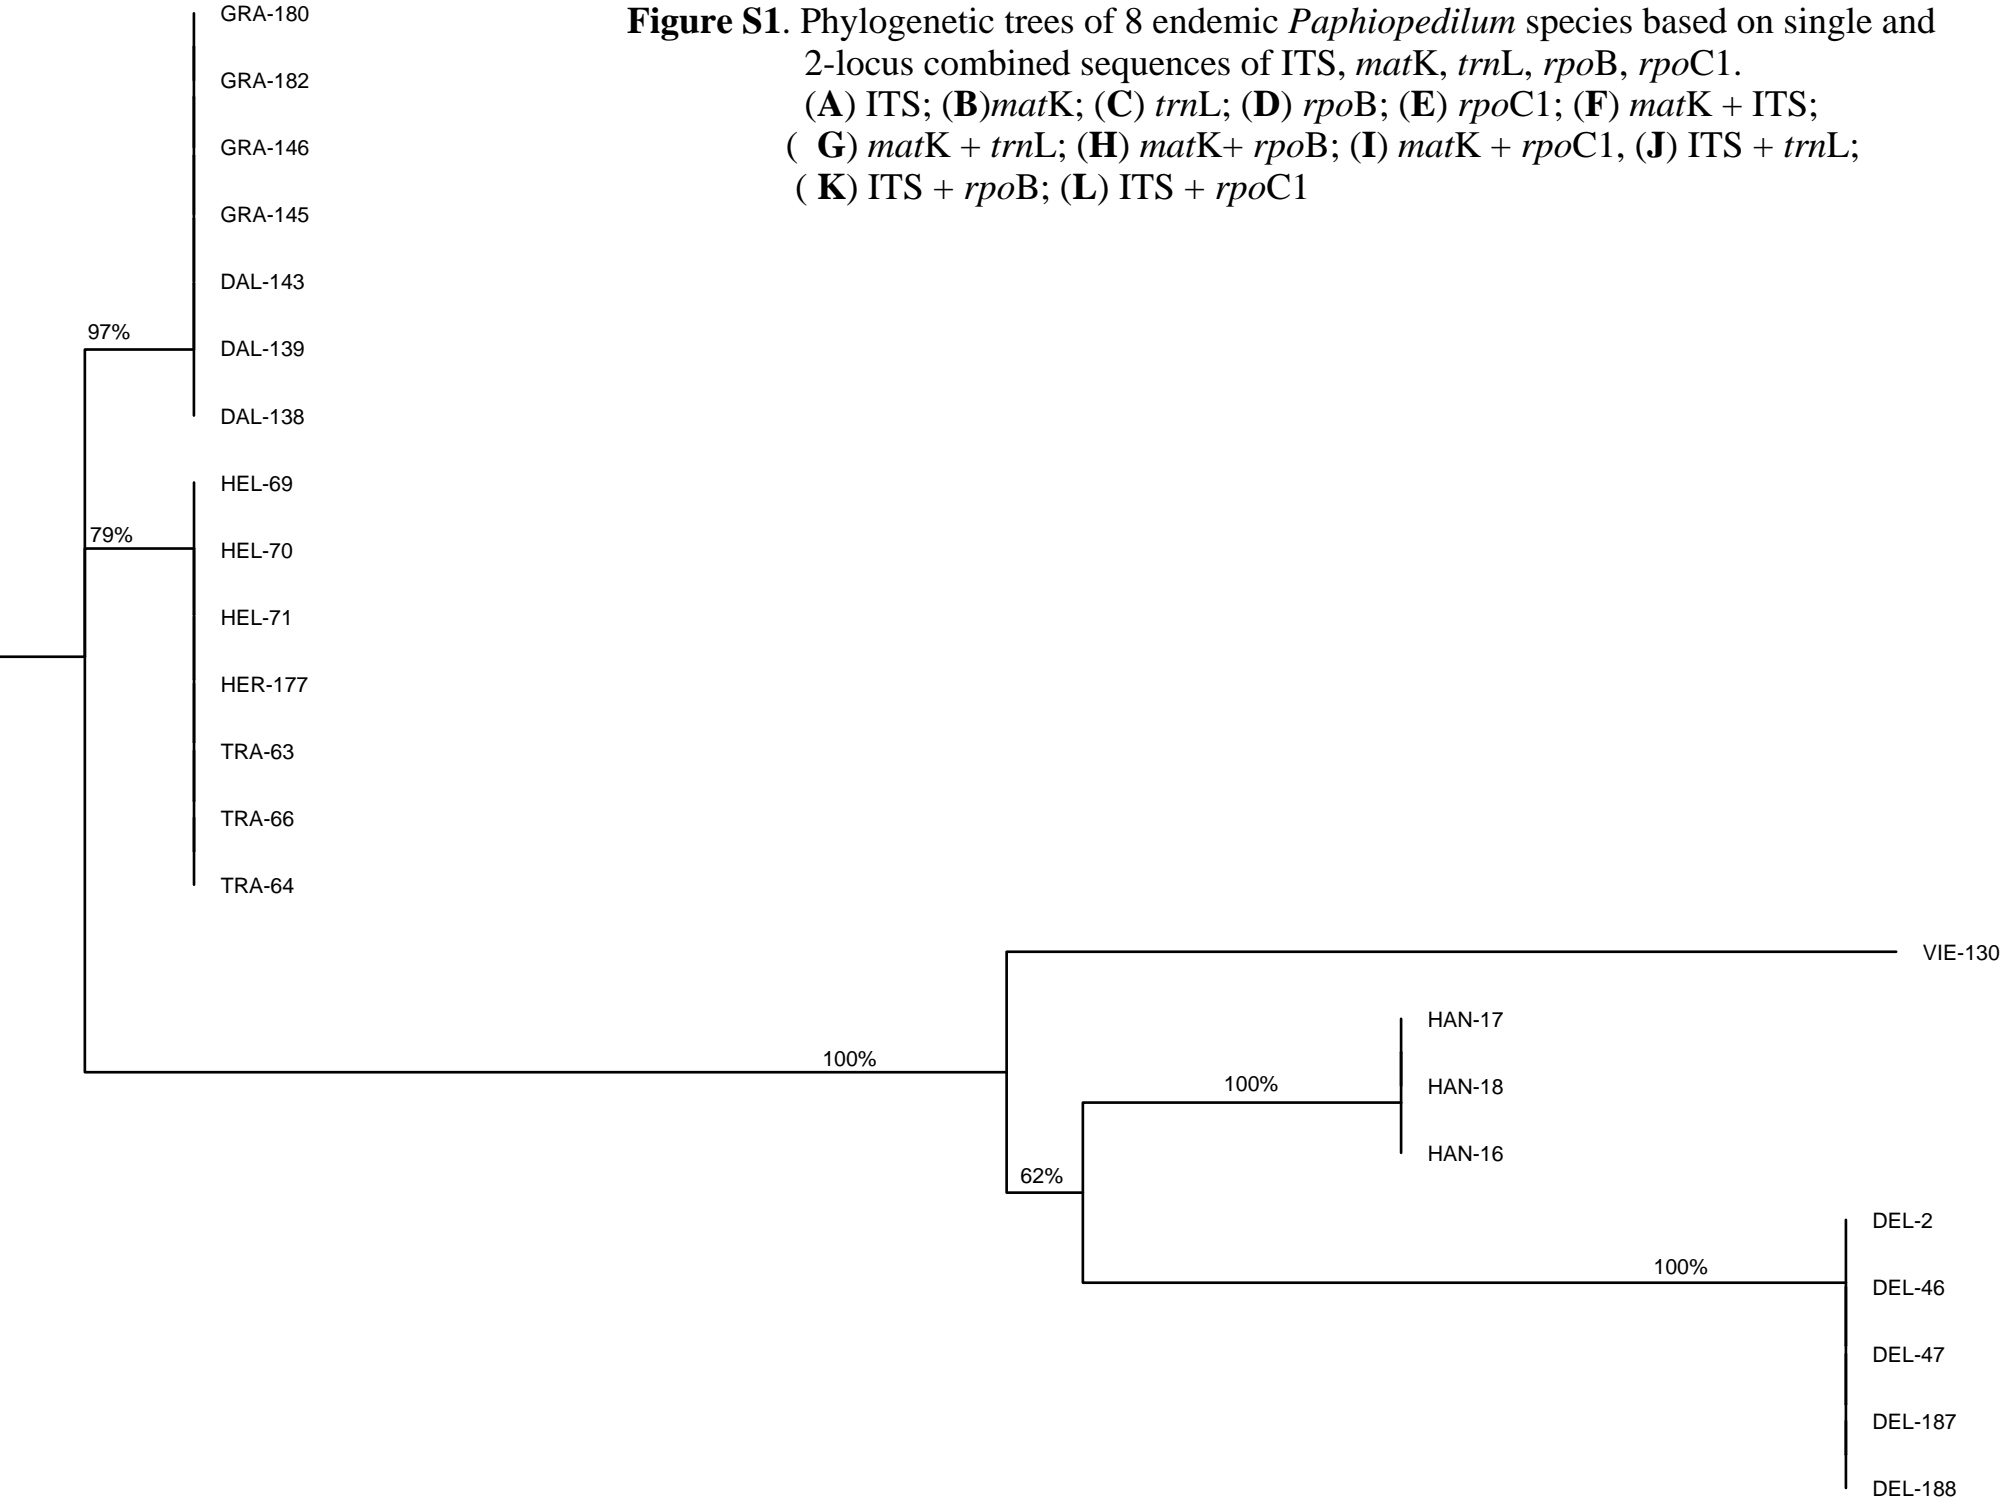

**A.** Phylogenetic tree of 8 endemic *Paphiopedilum* species  
based on single ITS locus

0.008

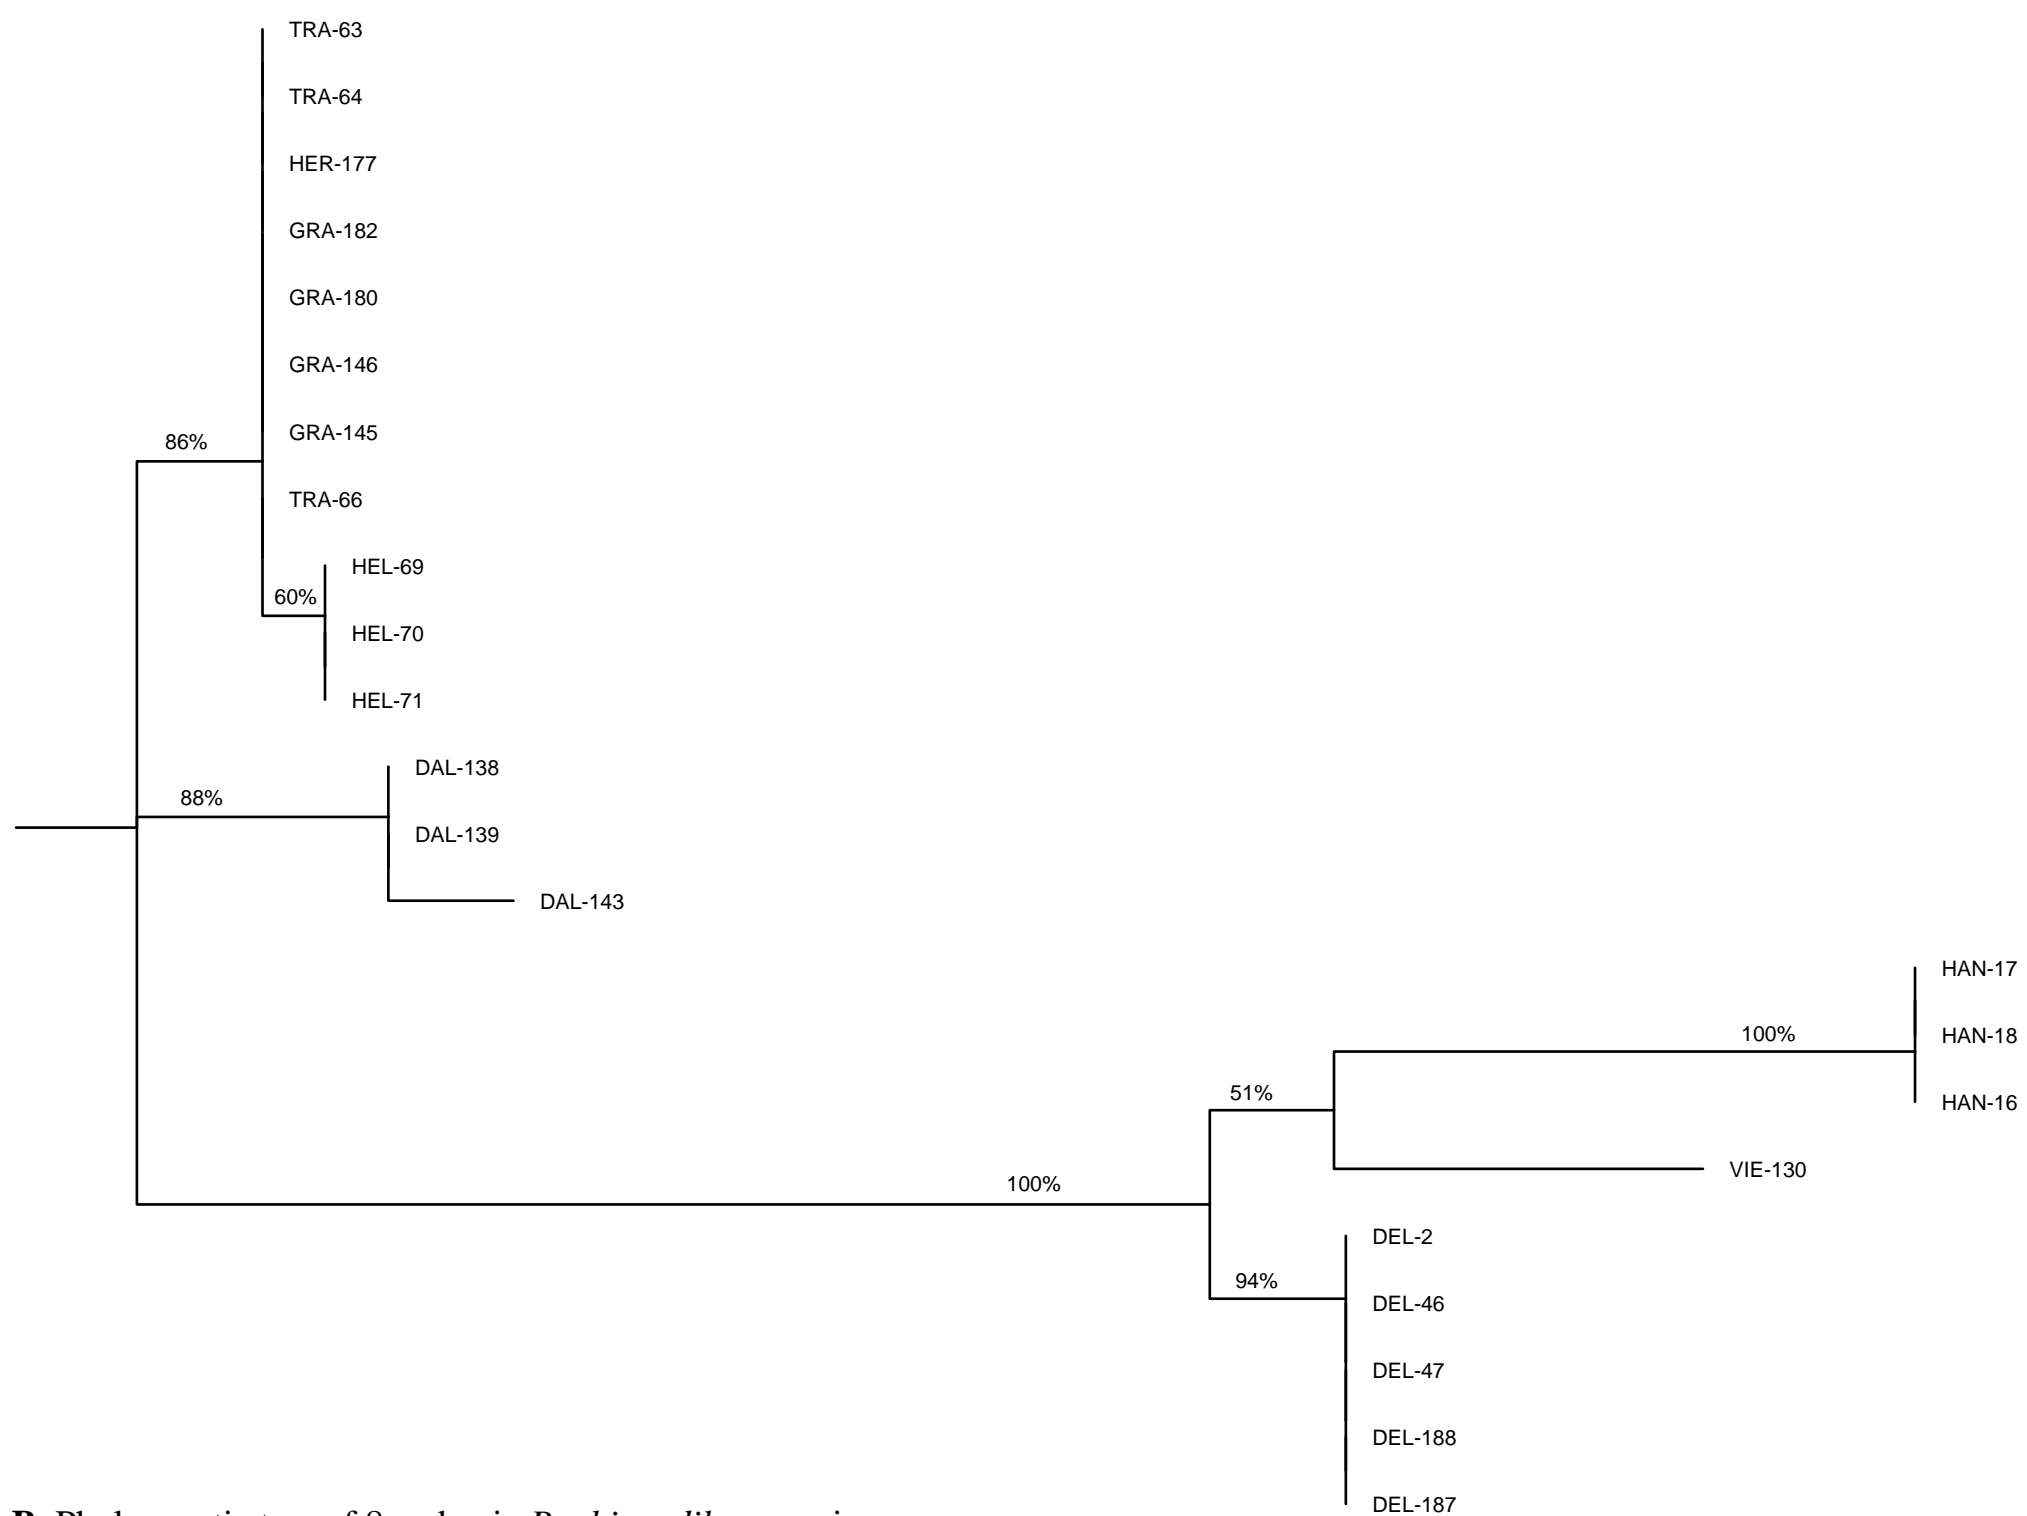

**B.** Phylogenetic tree of 8 endemic *Paphiopedilum* species  
based on single *matK* locus

0.003

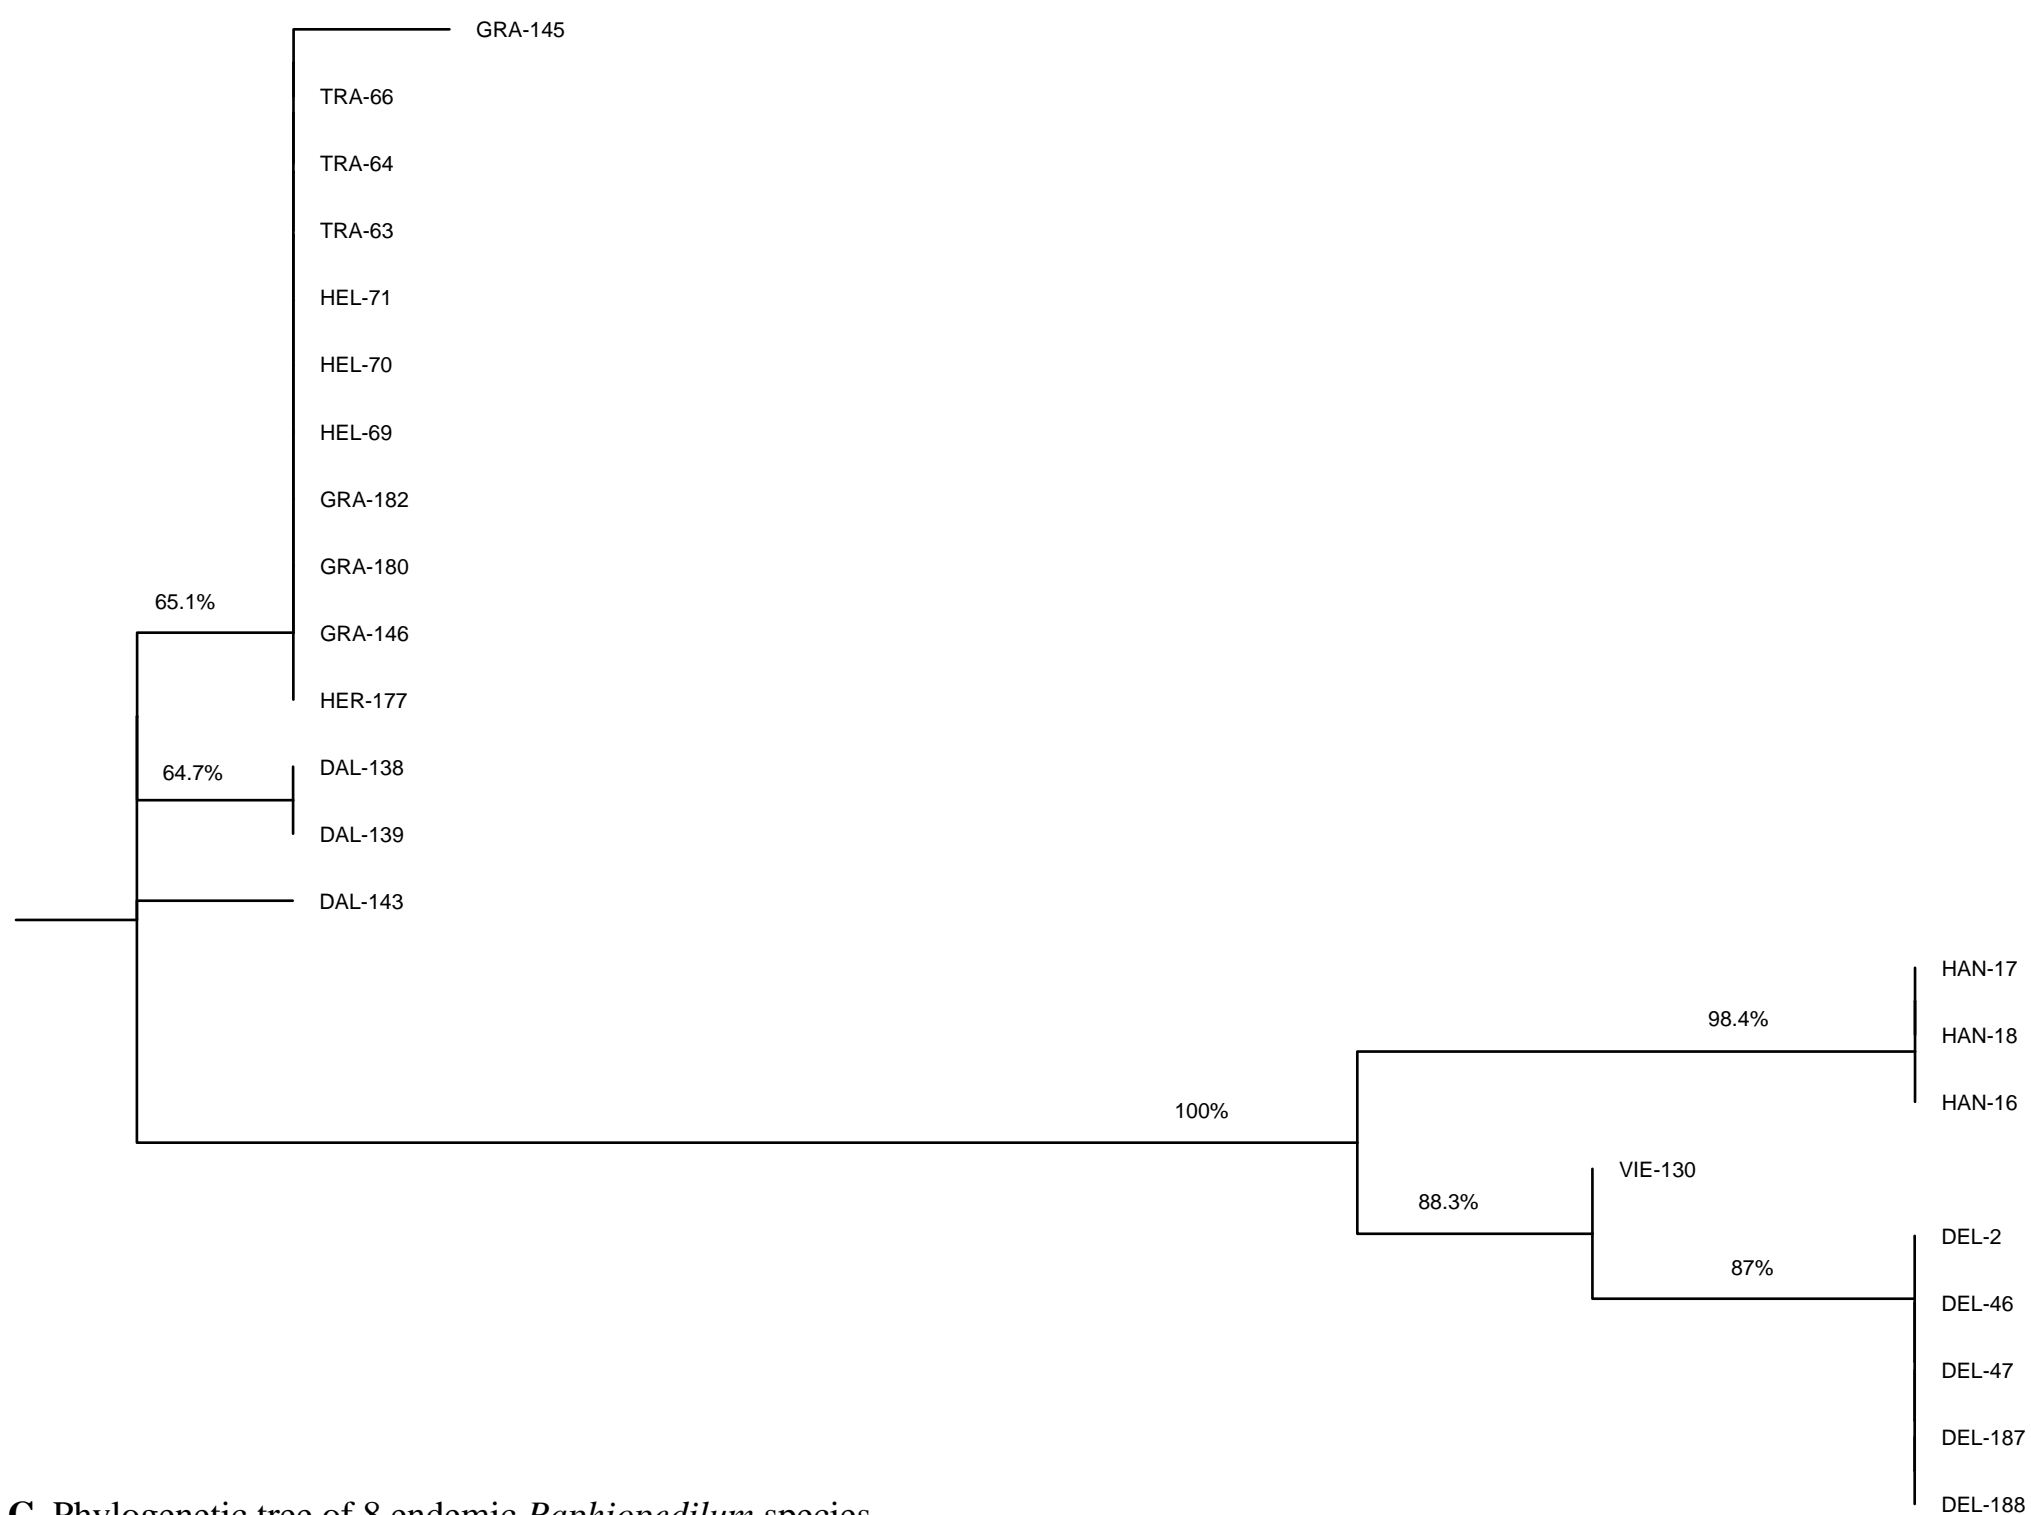

C. Phylogenetic tree of 8 endemic *Paphiopedilum* species  
based on single *trnL* locus

0.003

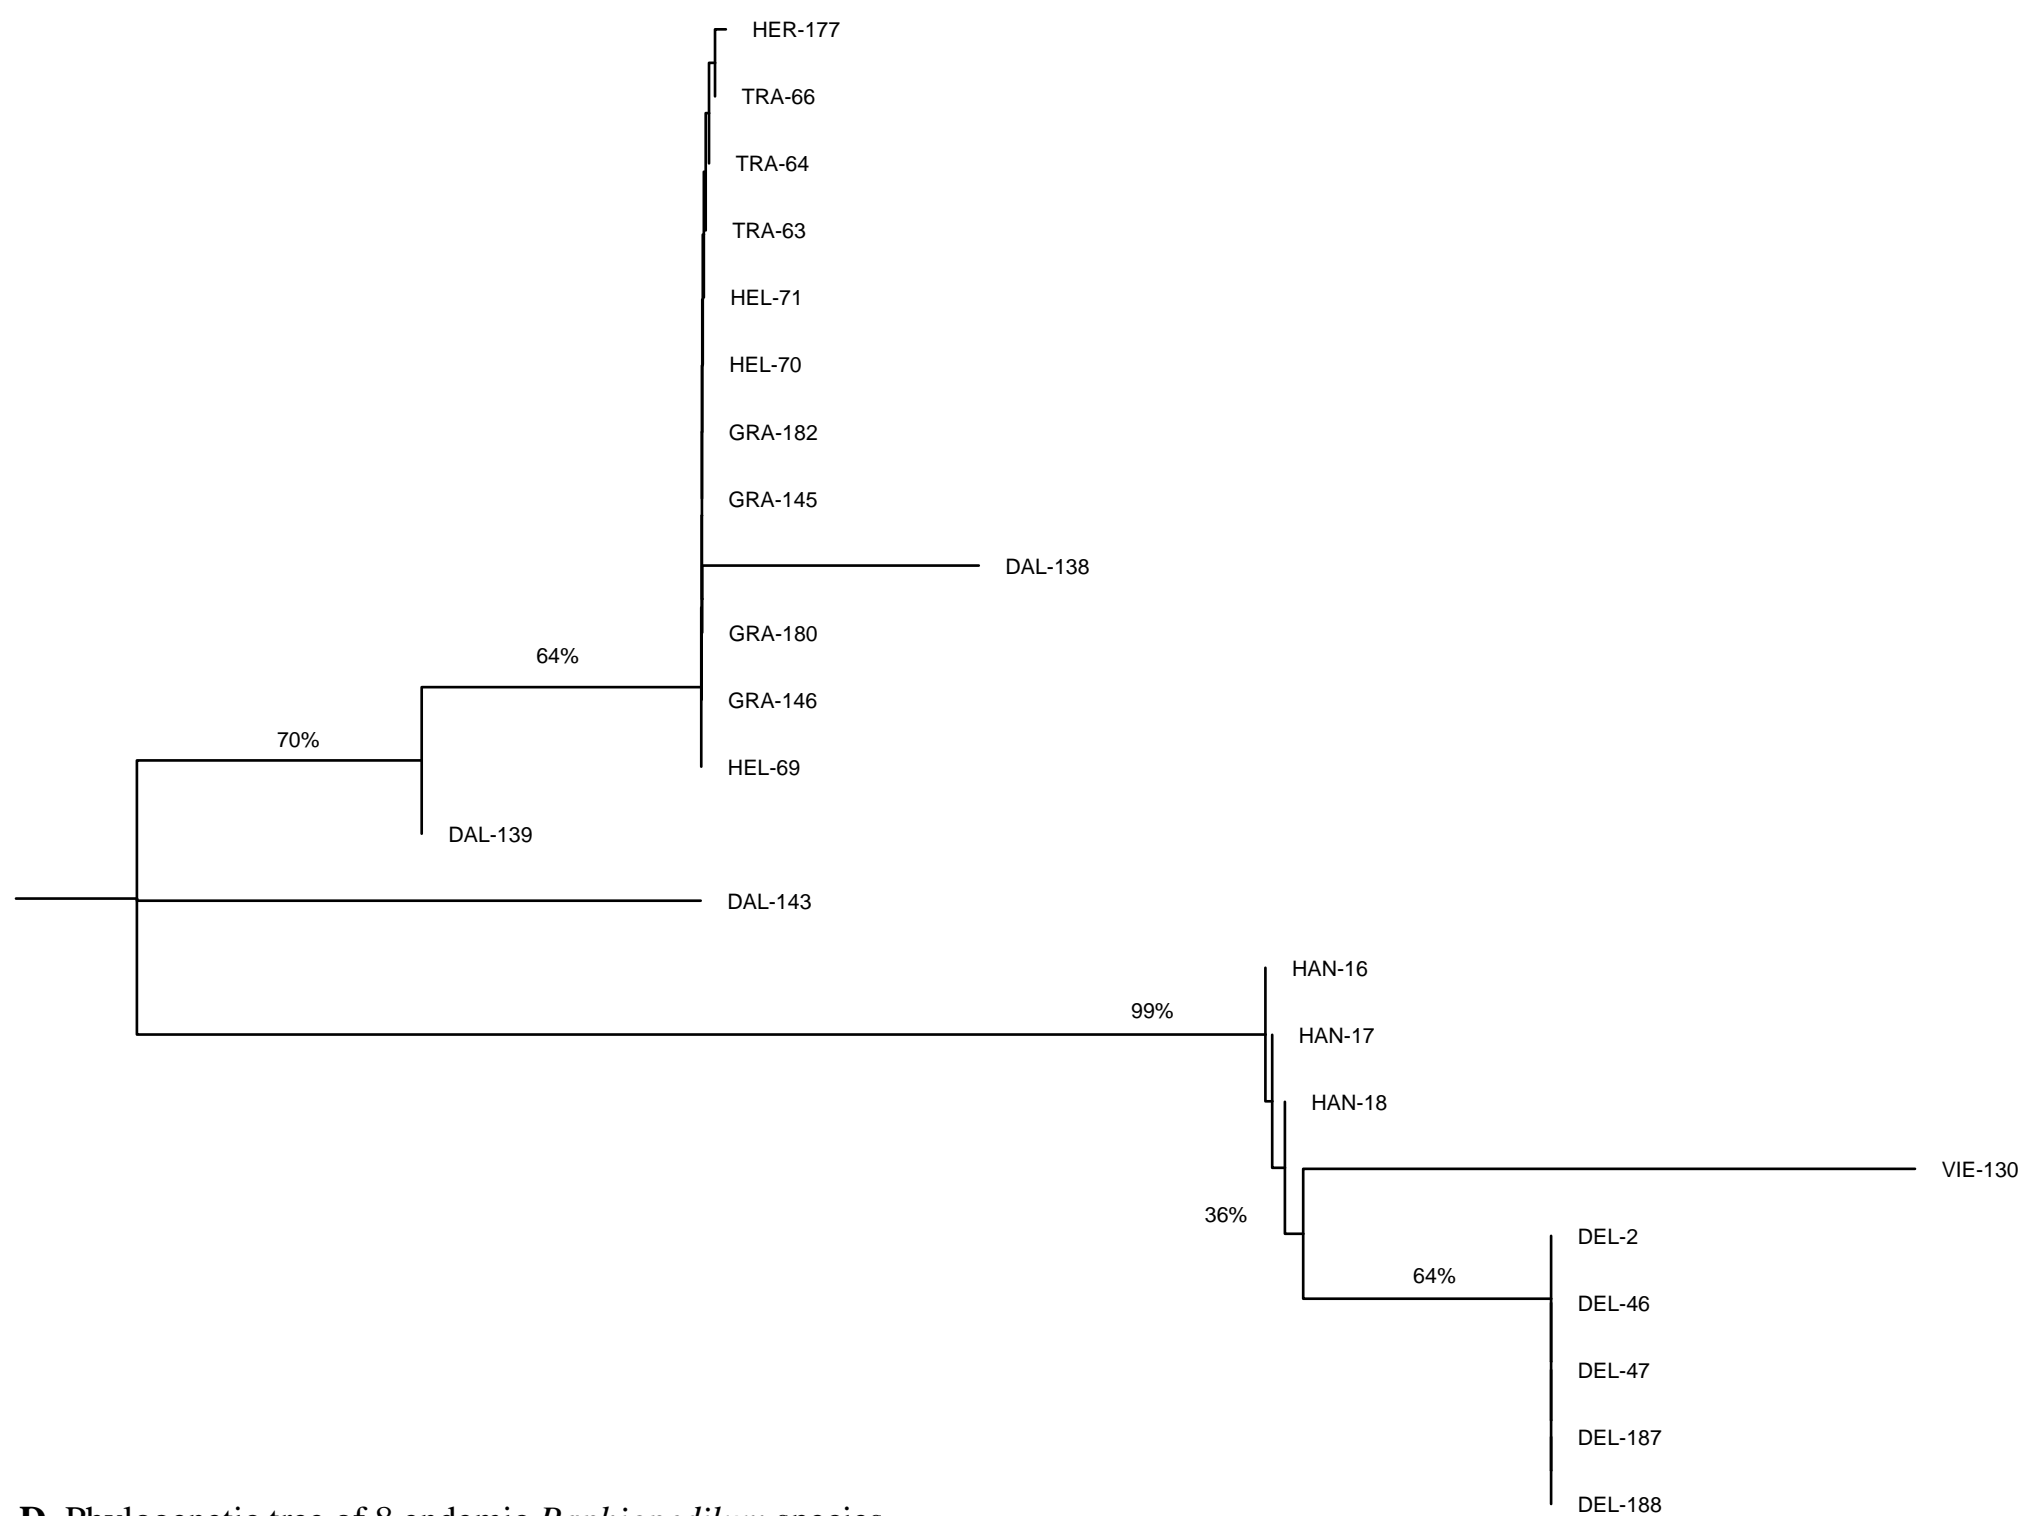

**D.** Phylogenetic tree of 8 endemic *Paphiopedilum* species  
based on single *rpoB* locus

0.002

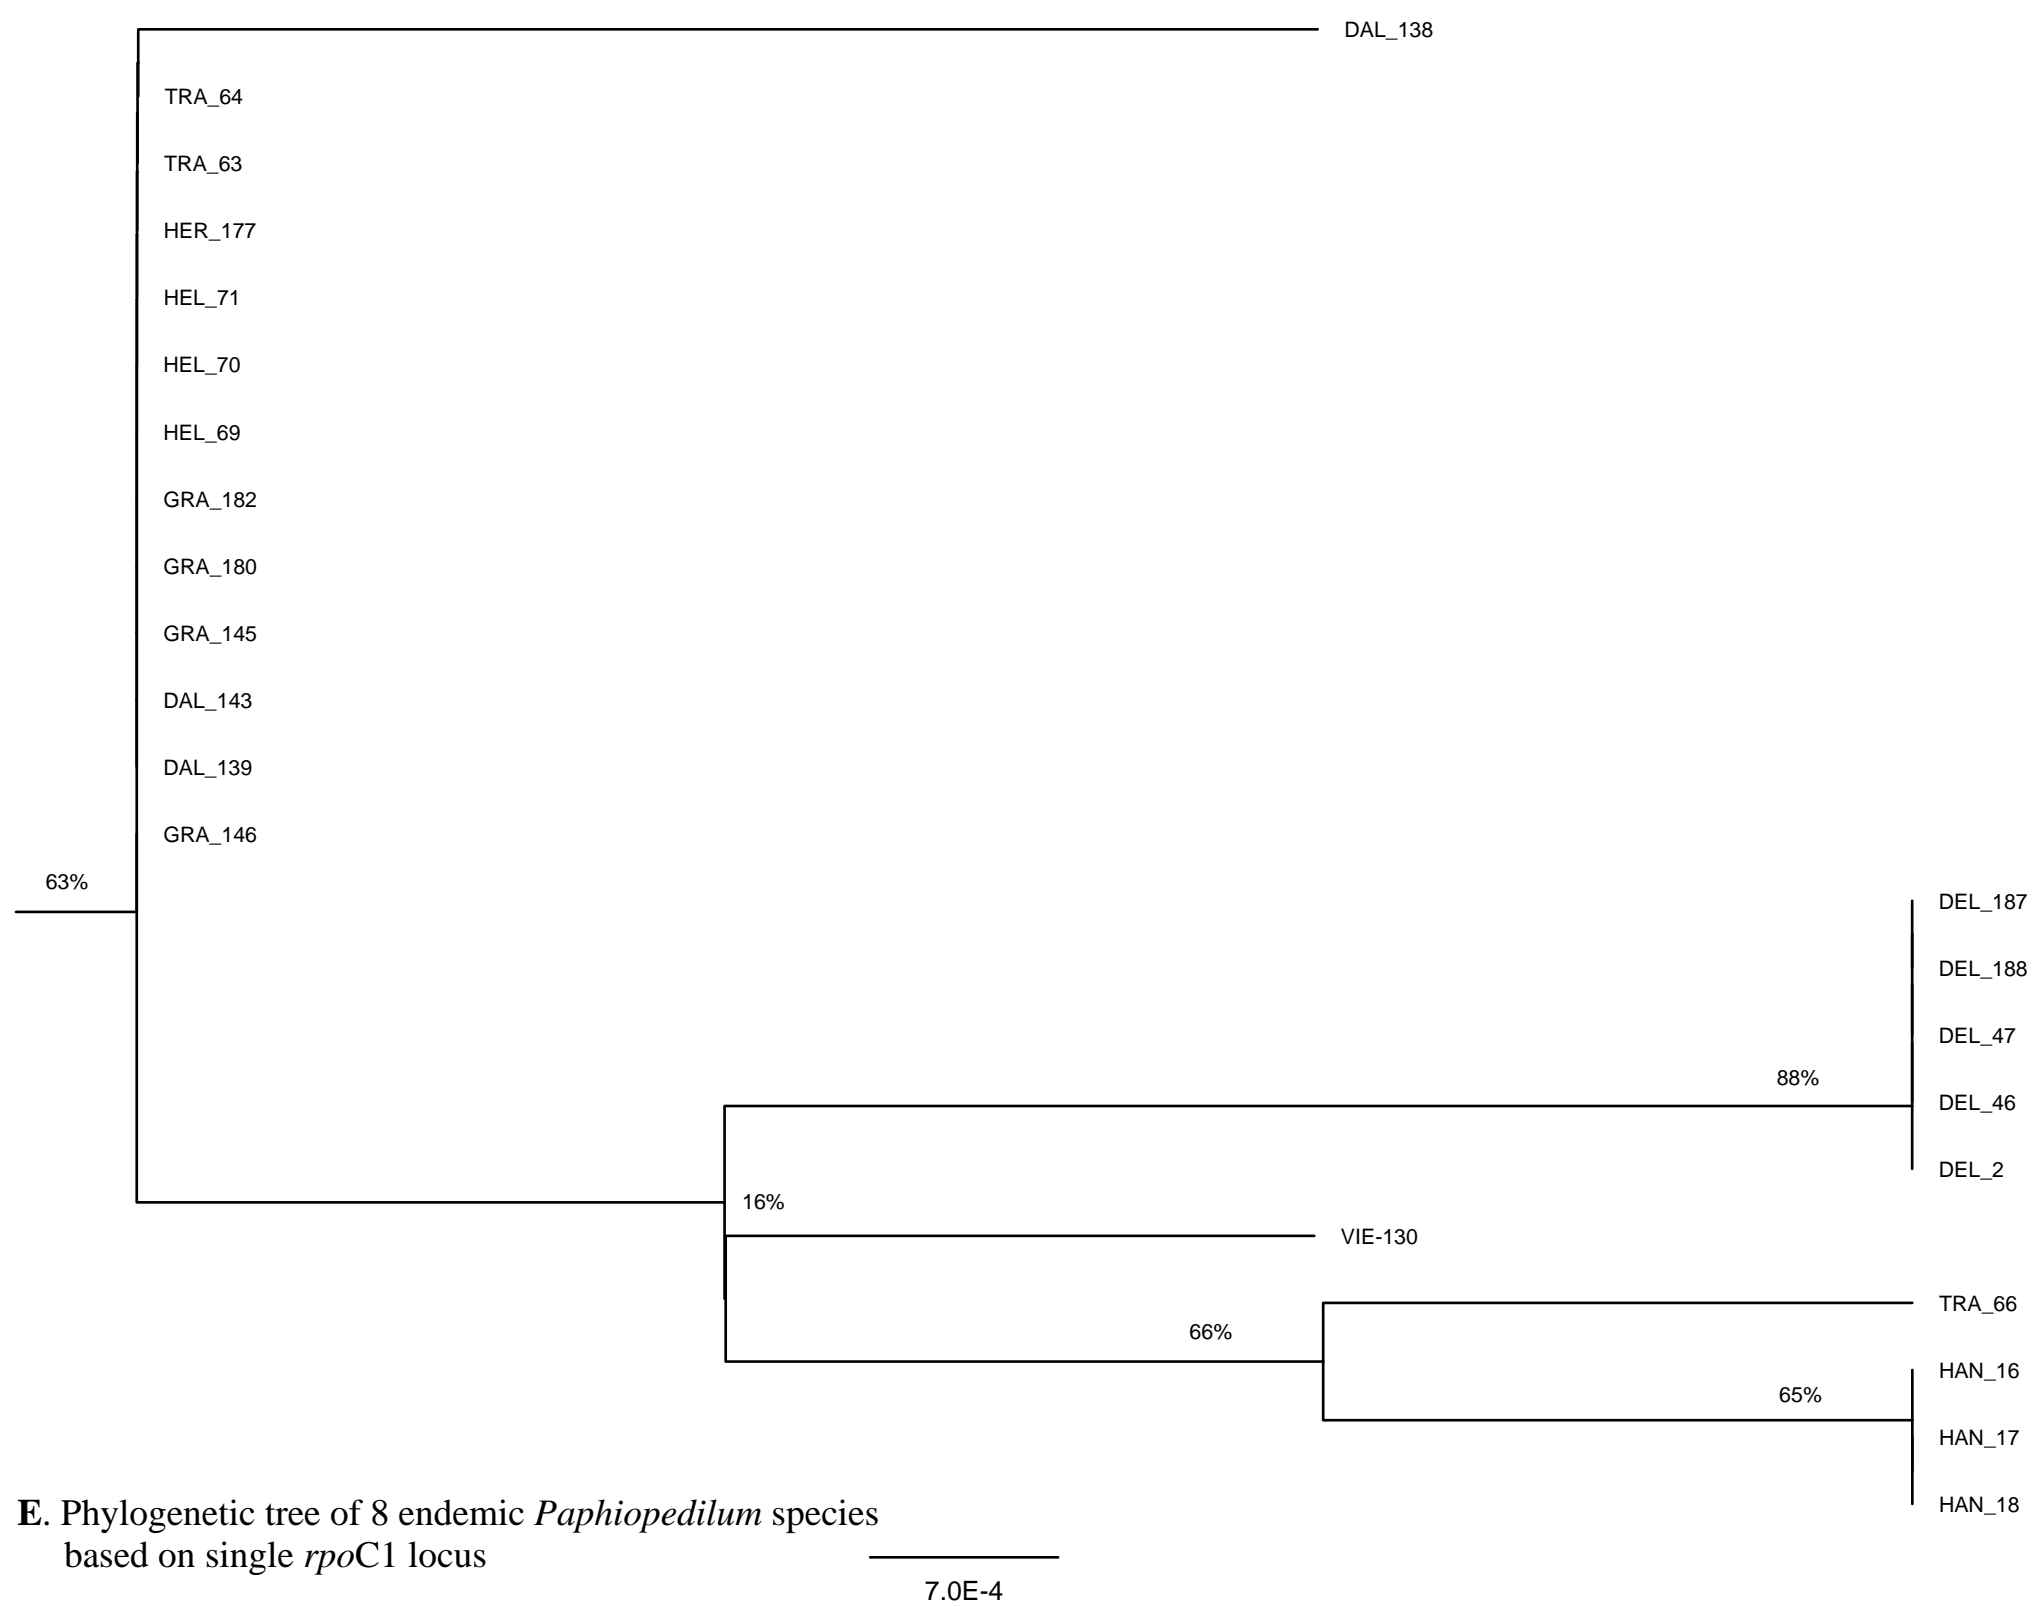

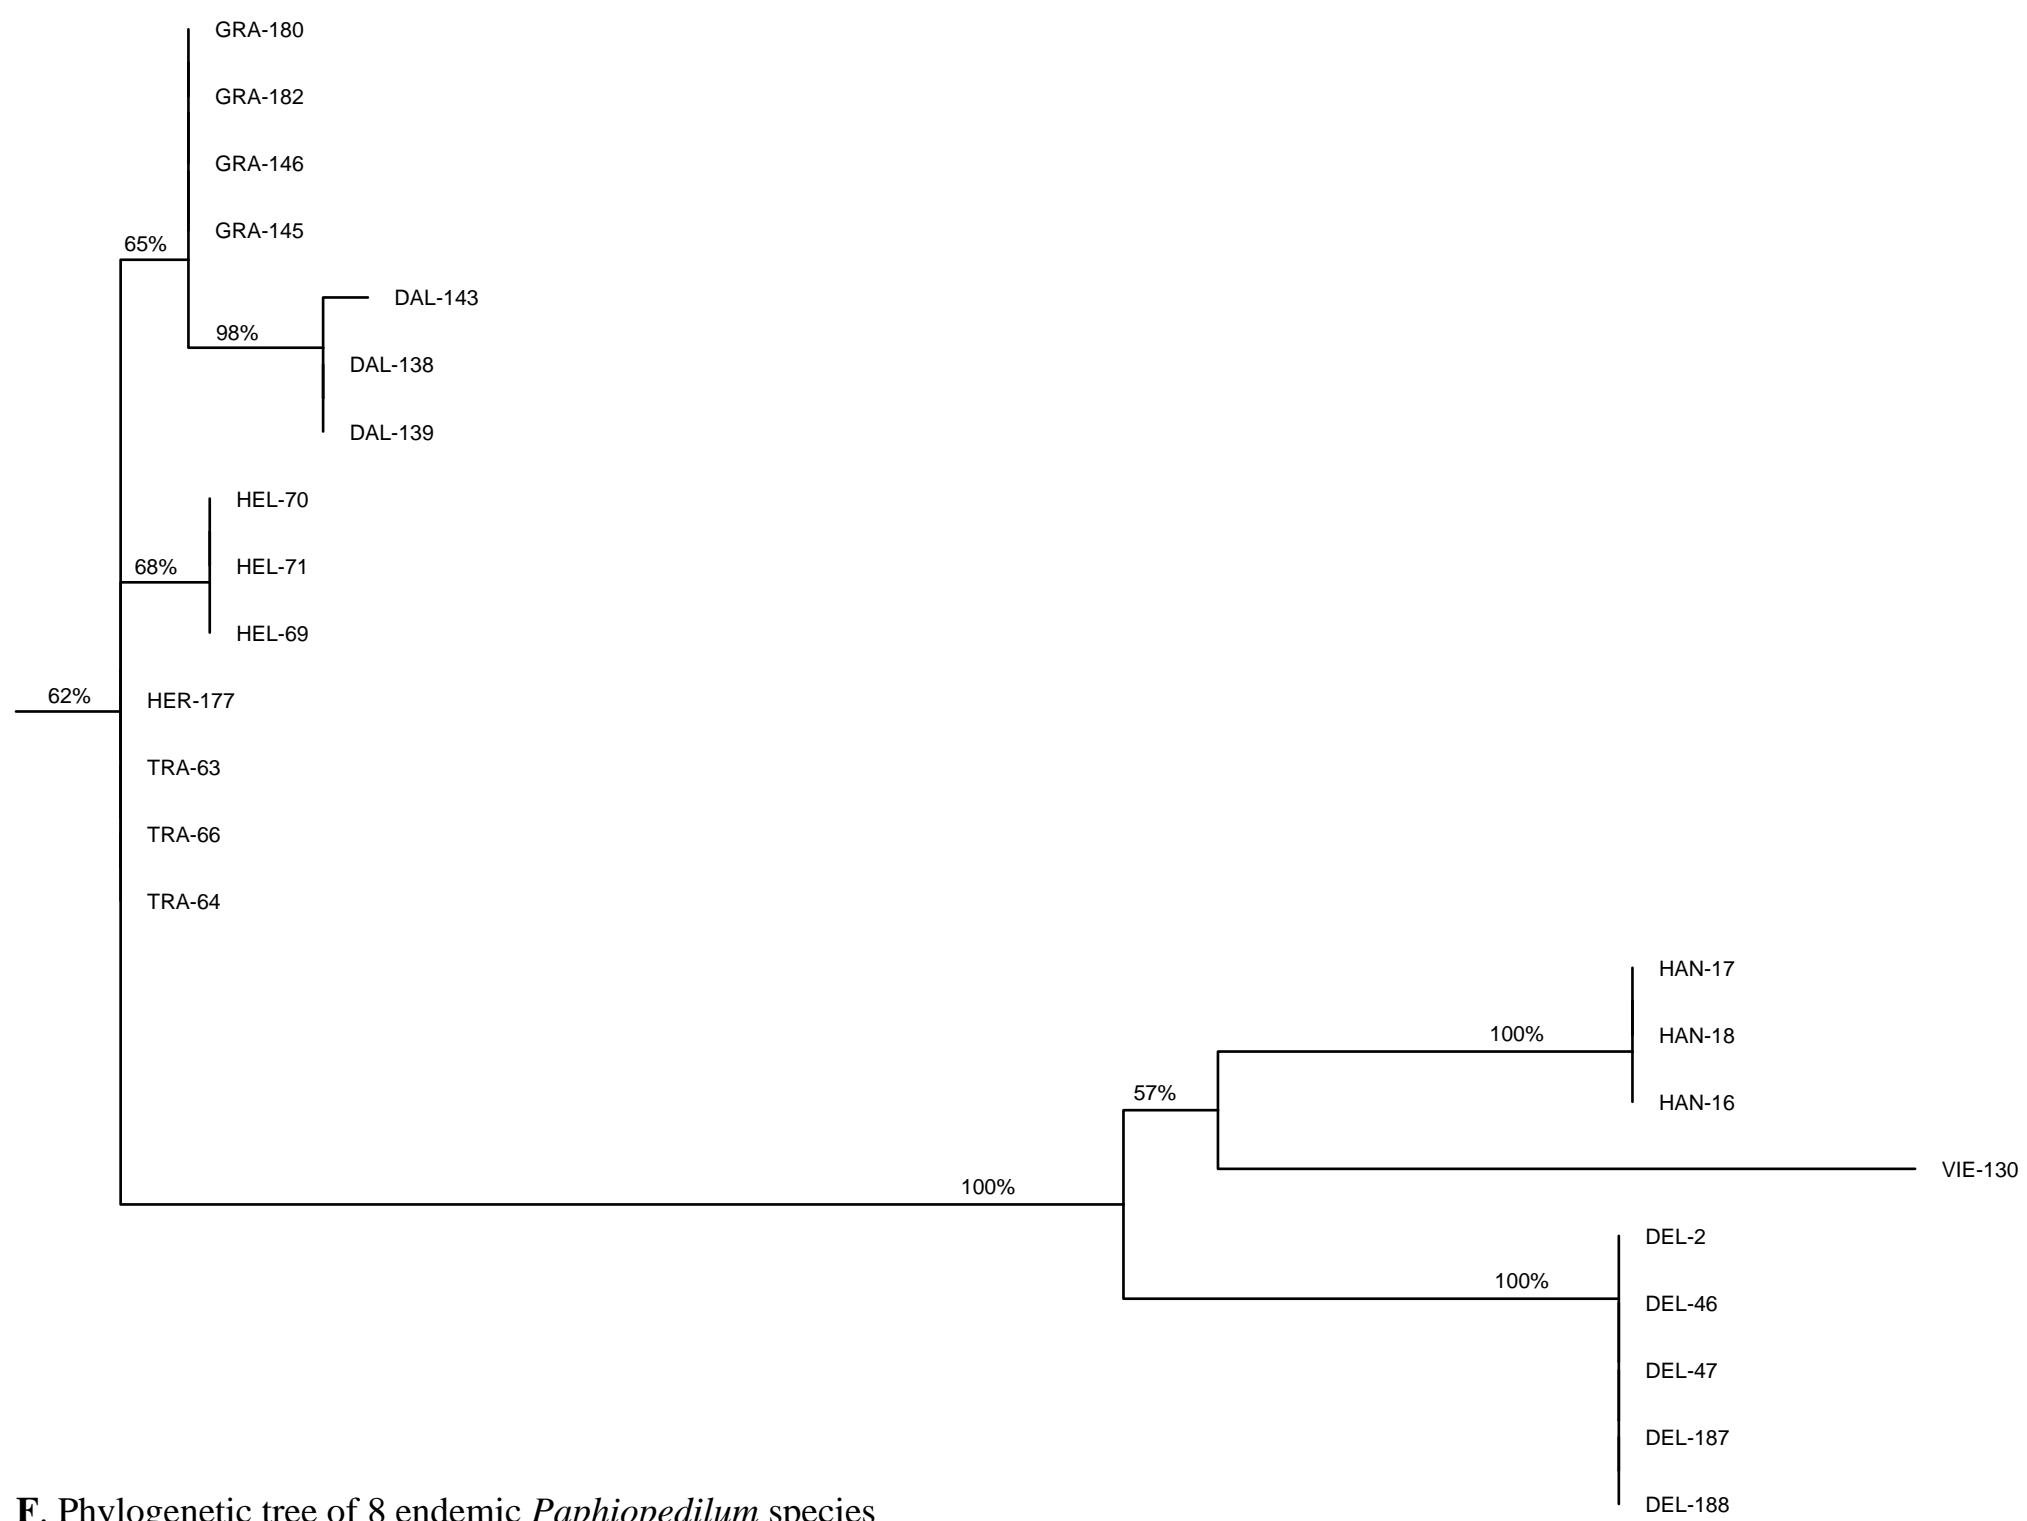

**F.** Phylogenetic tree of 8 endemic *Paphiopedilum* species based on combined *matK* + ITS locus

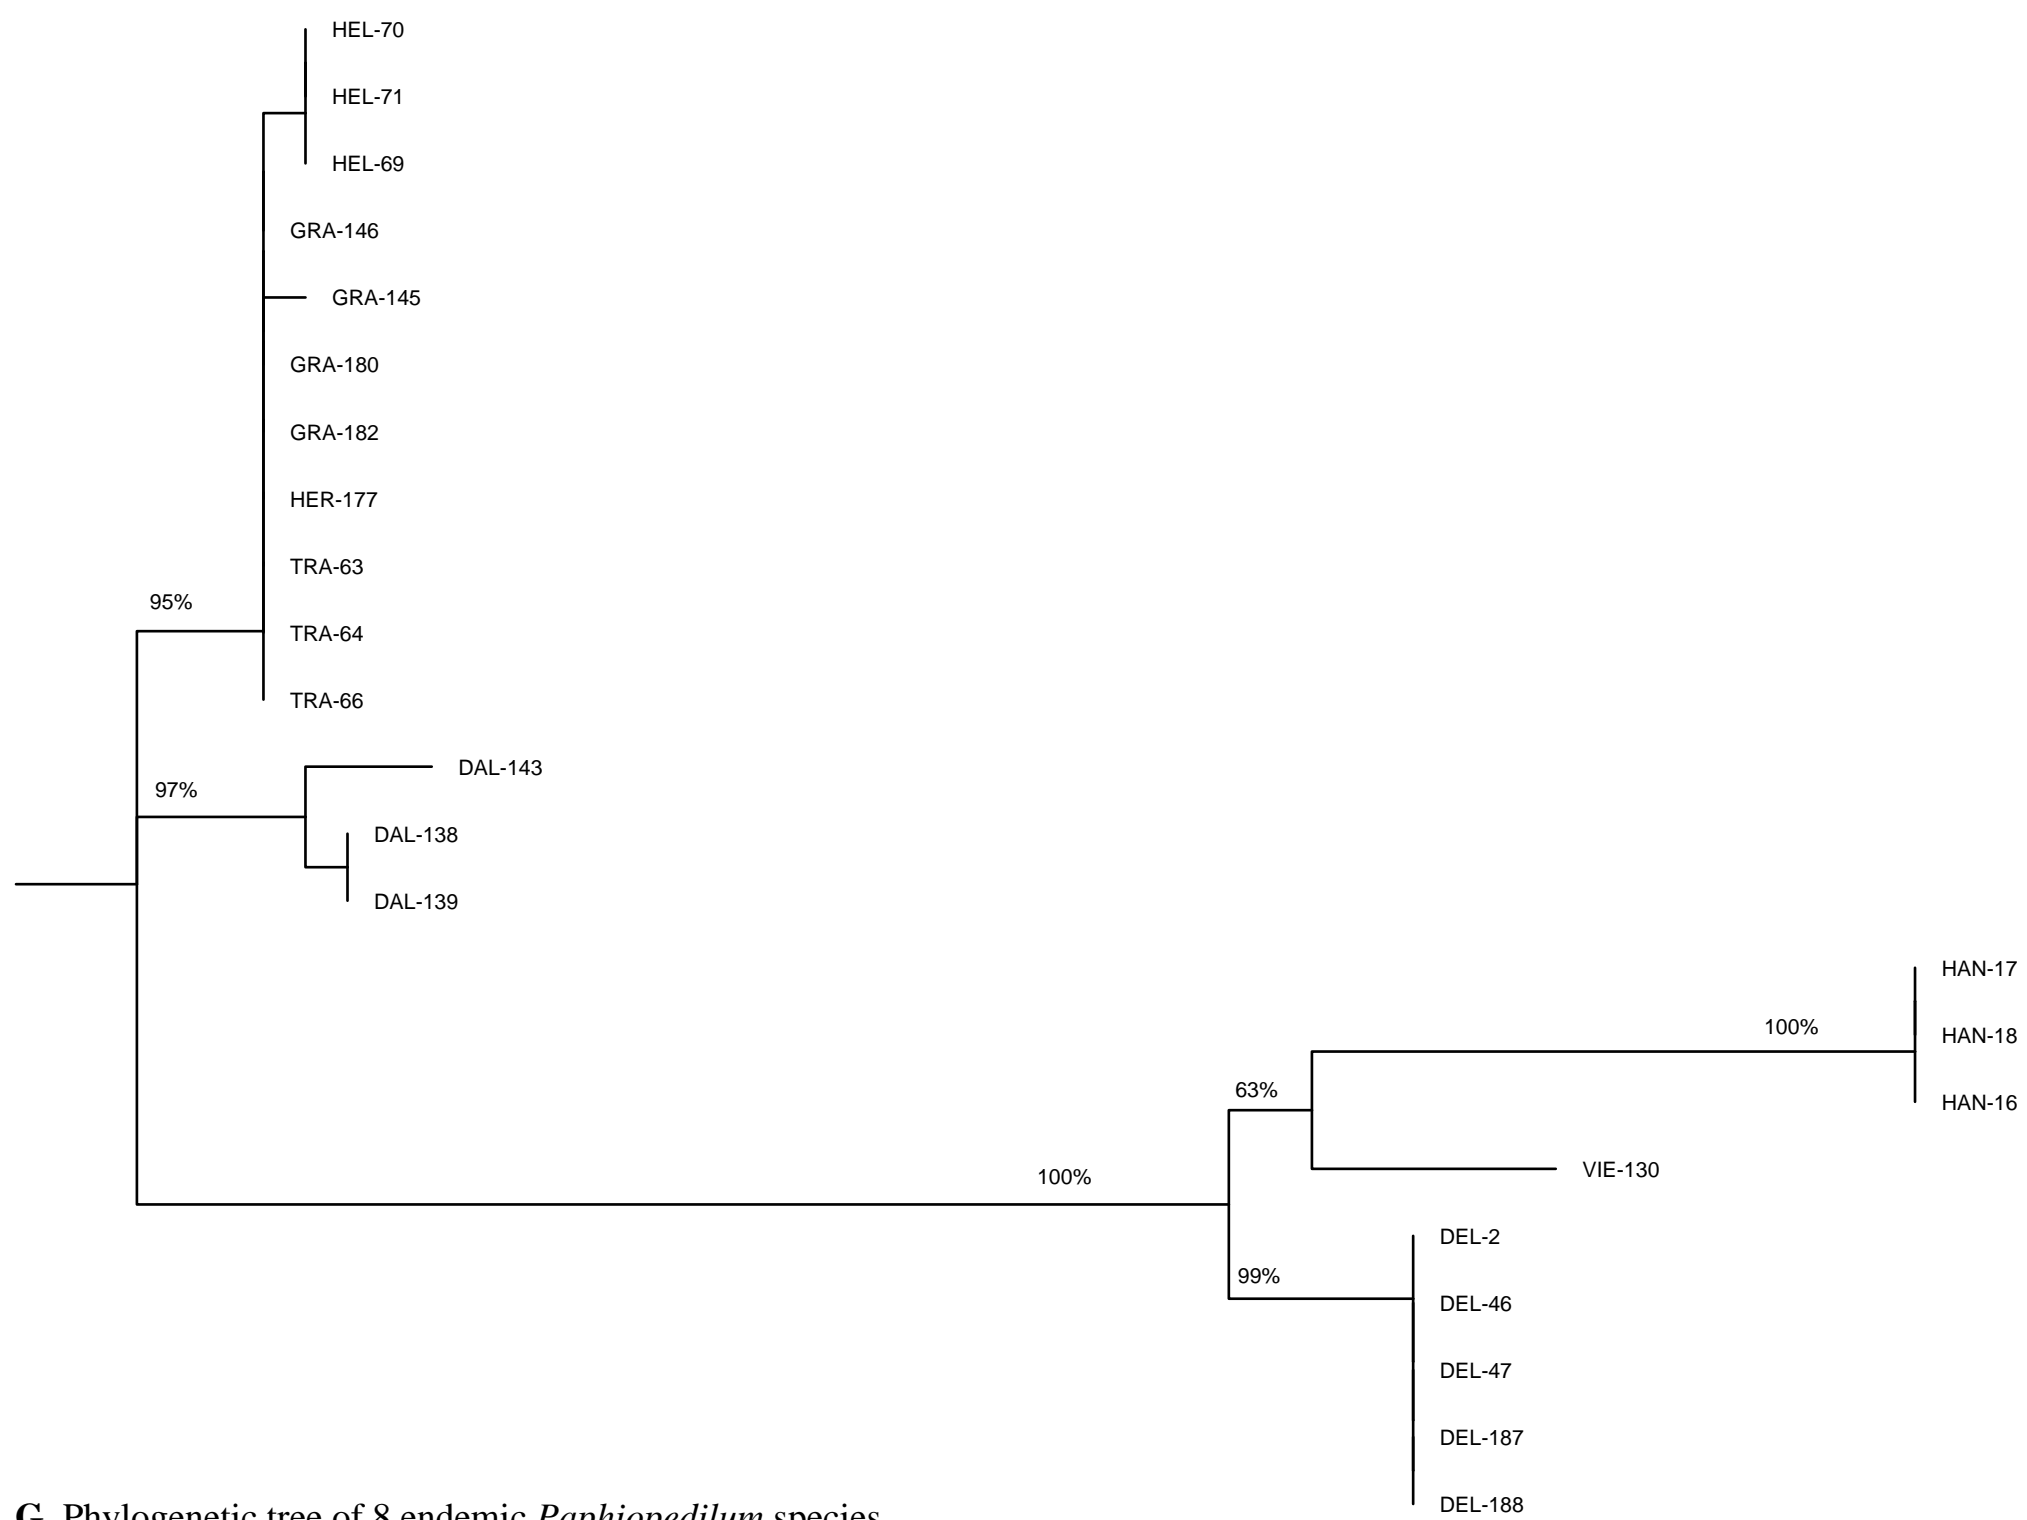

**G.** Phylogenetic tree of 8 endemic *Paphiopedilum* species  
based on combined *matK* + *trnL* locus

0.003

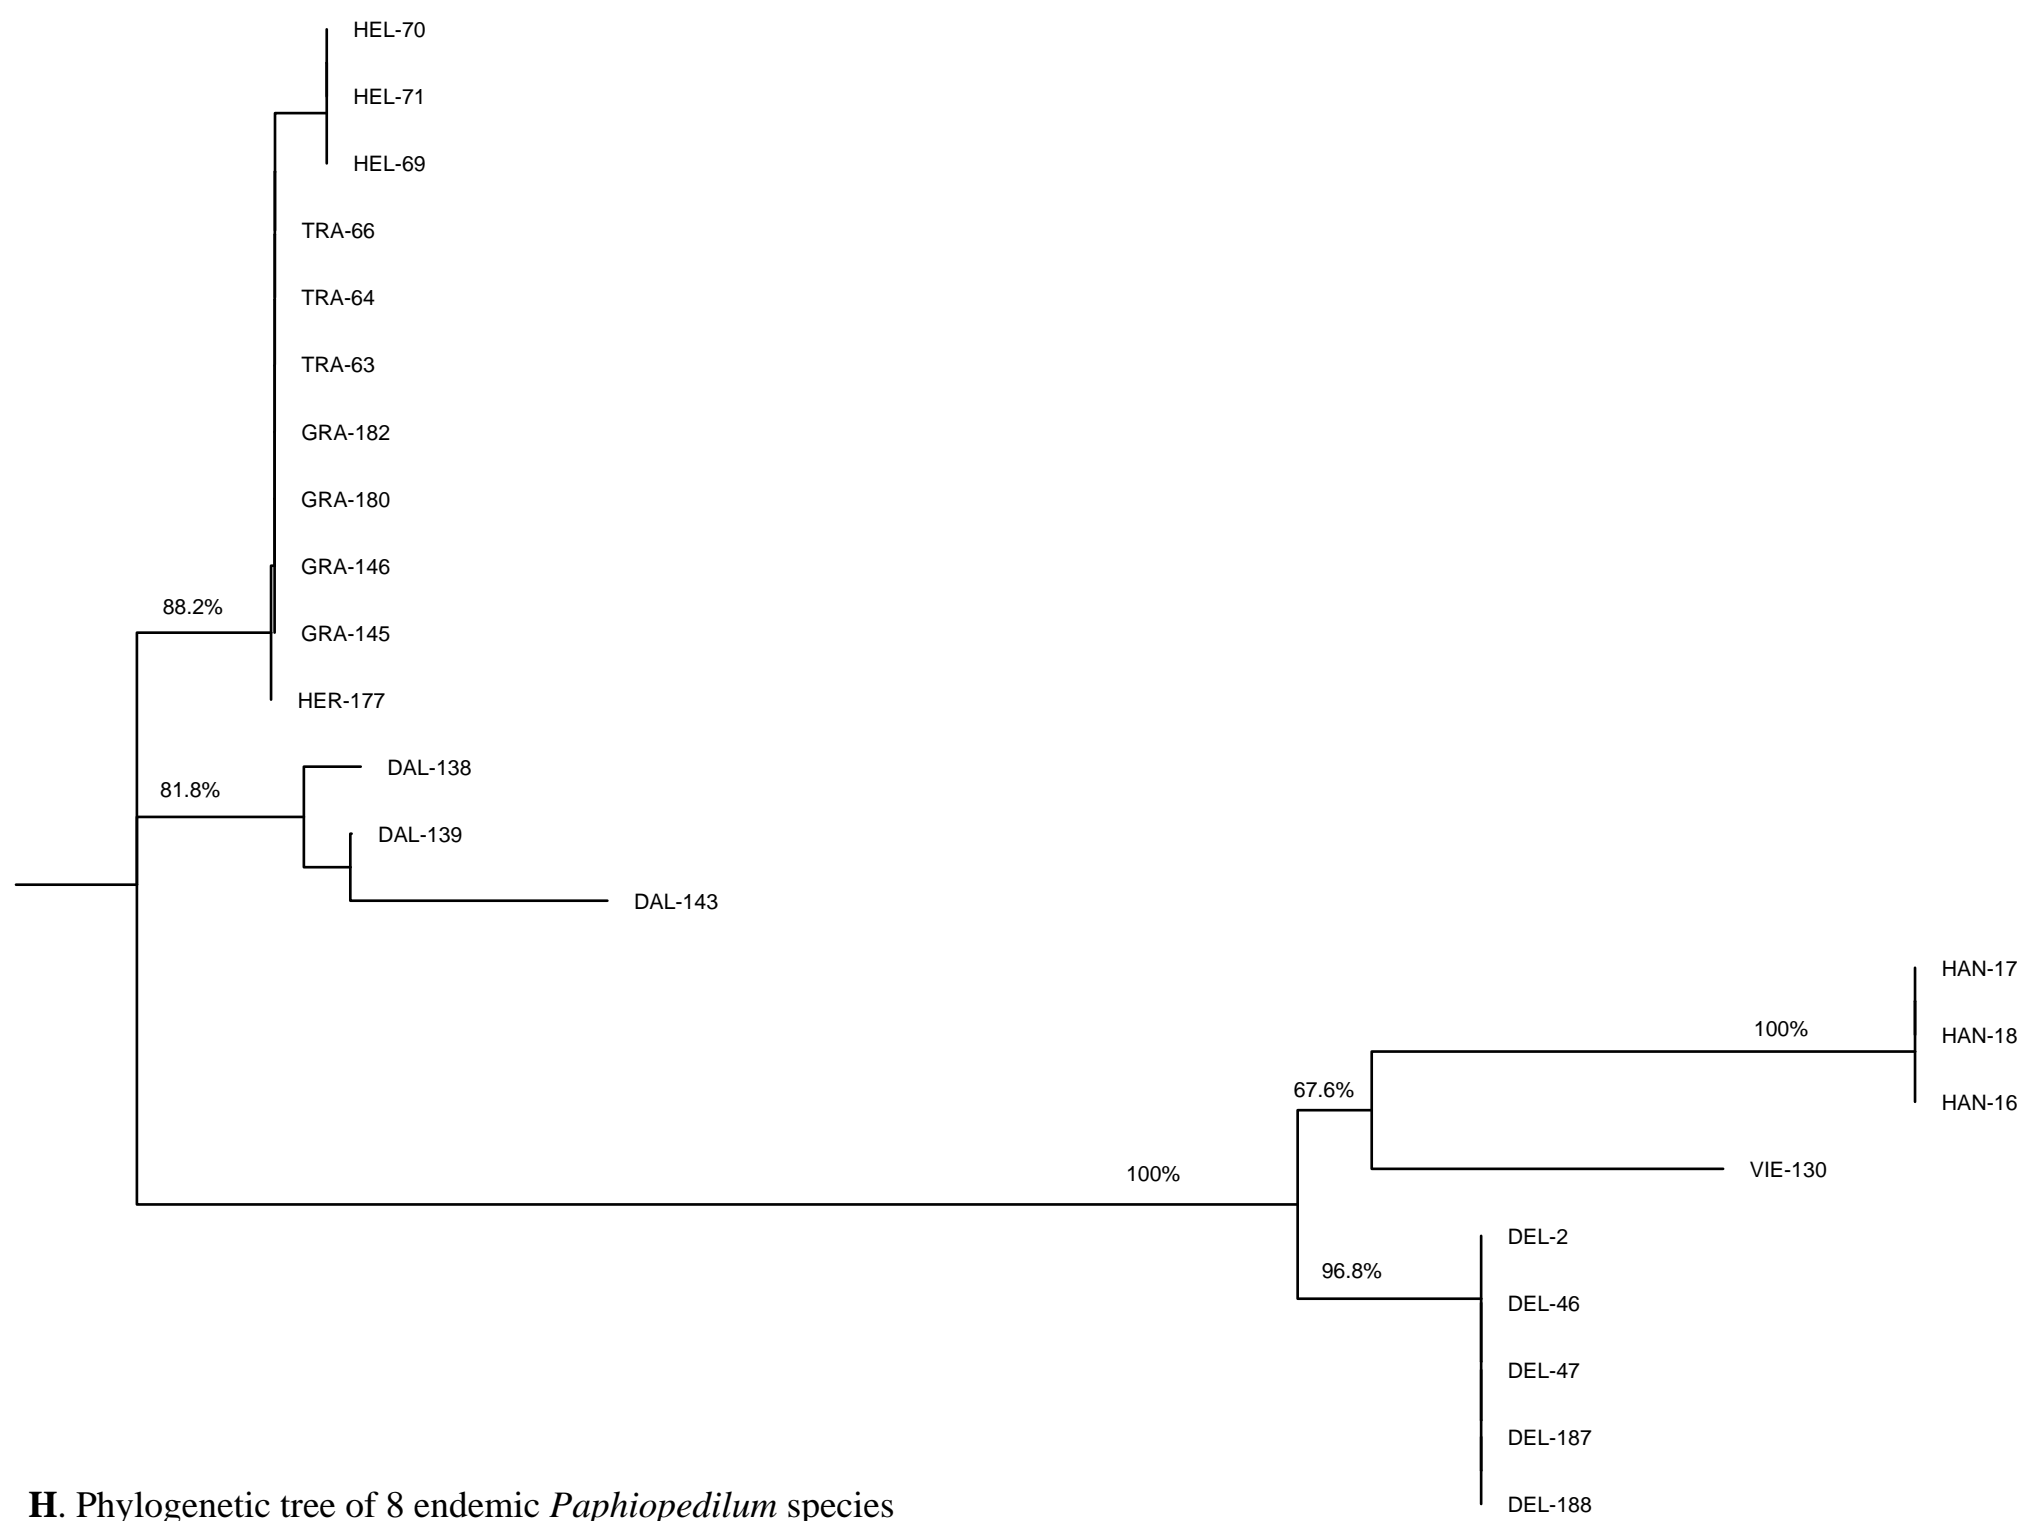

**H.** Phylogenetic tree of 8 endemic *Paphiopedilum* species based on combined *matK* + *rpoB* locus

0.003



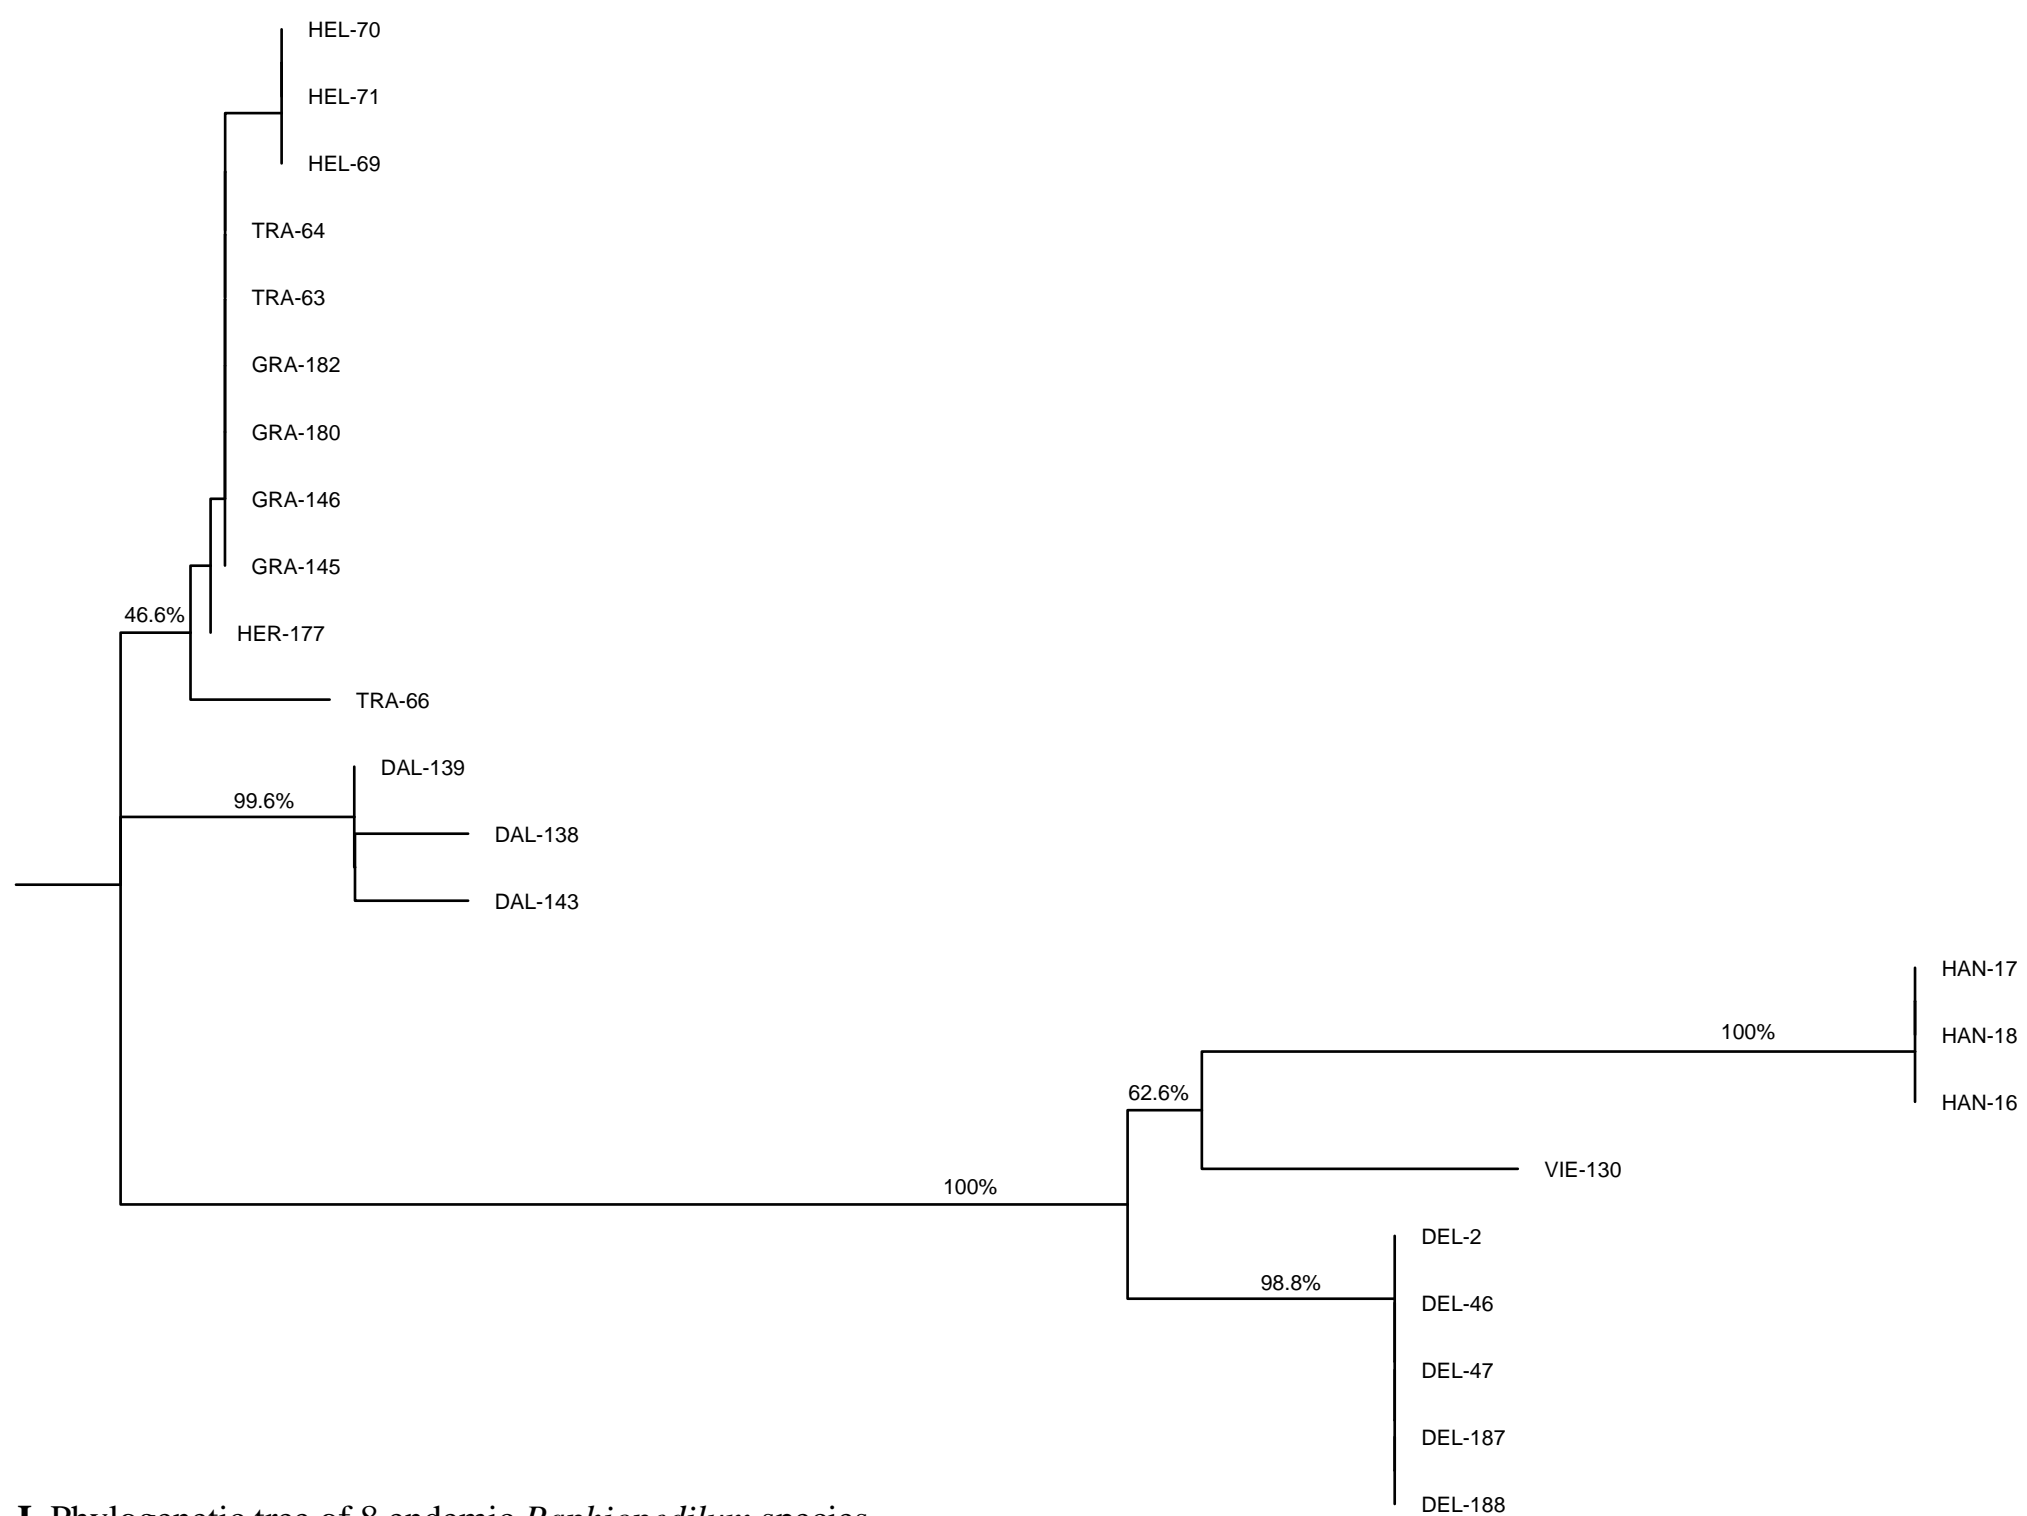

**I.** Phylogenetic tree of 8 endemic *Paphiopedilum* species  
based on combined *matK* + *rpoC1* locus

0.003

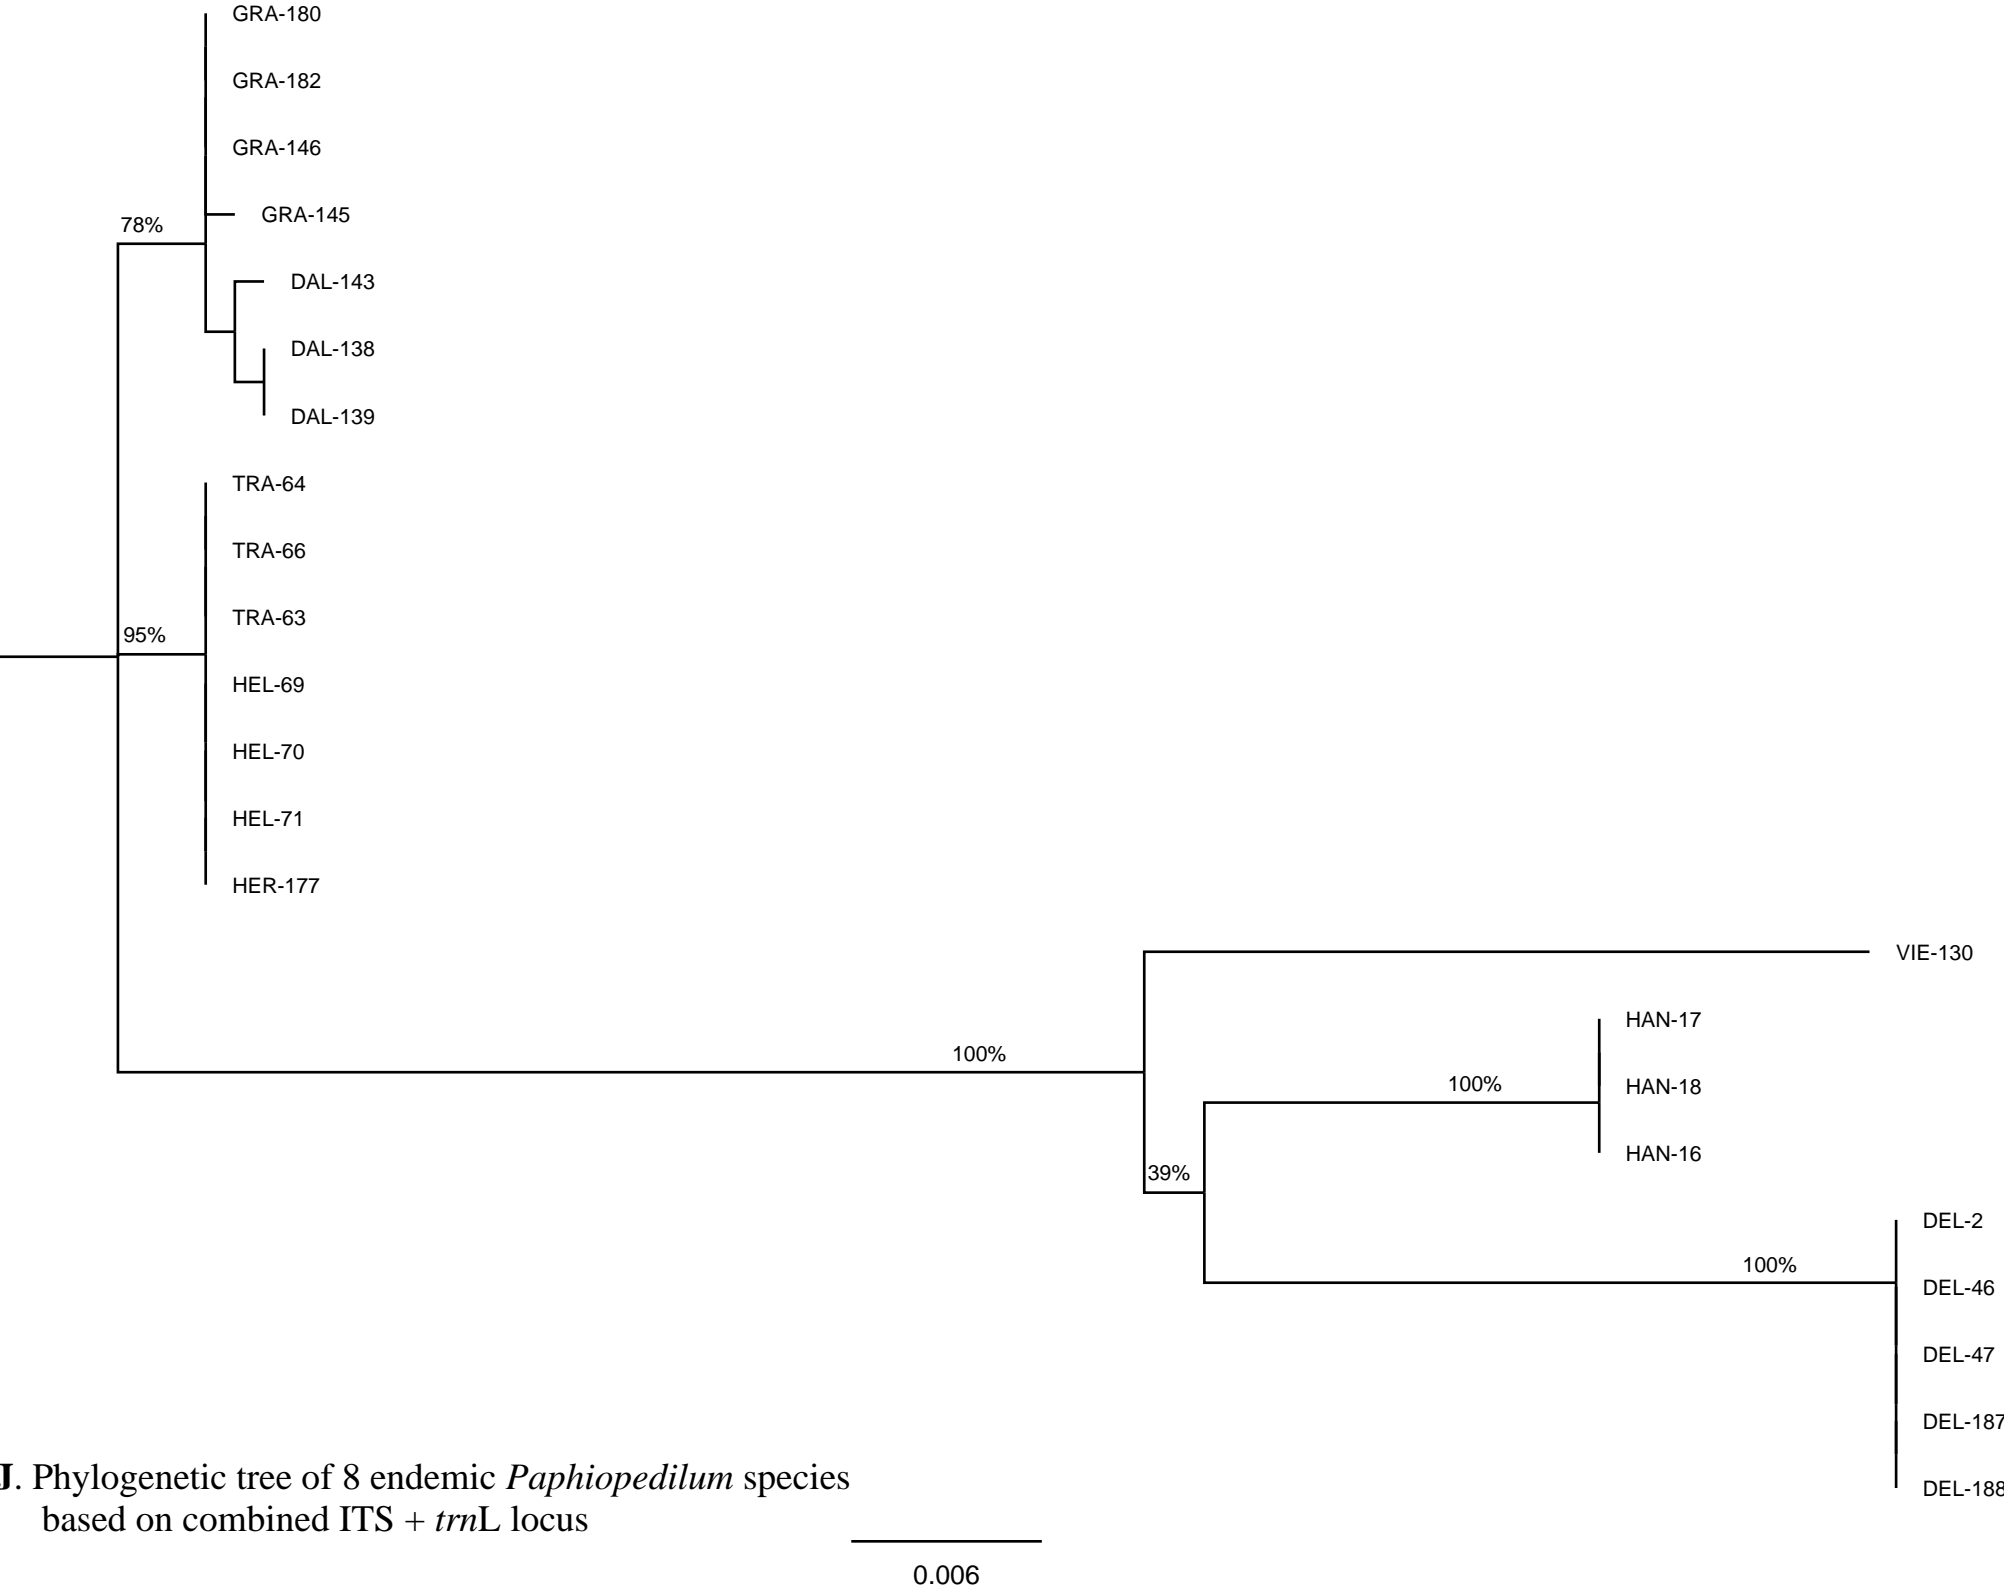

**J.** Phylogenetic tree of 8 endemic *Paphiopedilum* species based on combined ITS + *trnL* locus

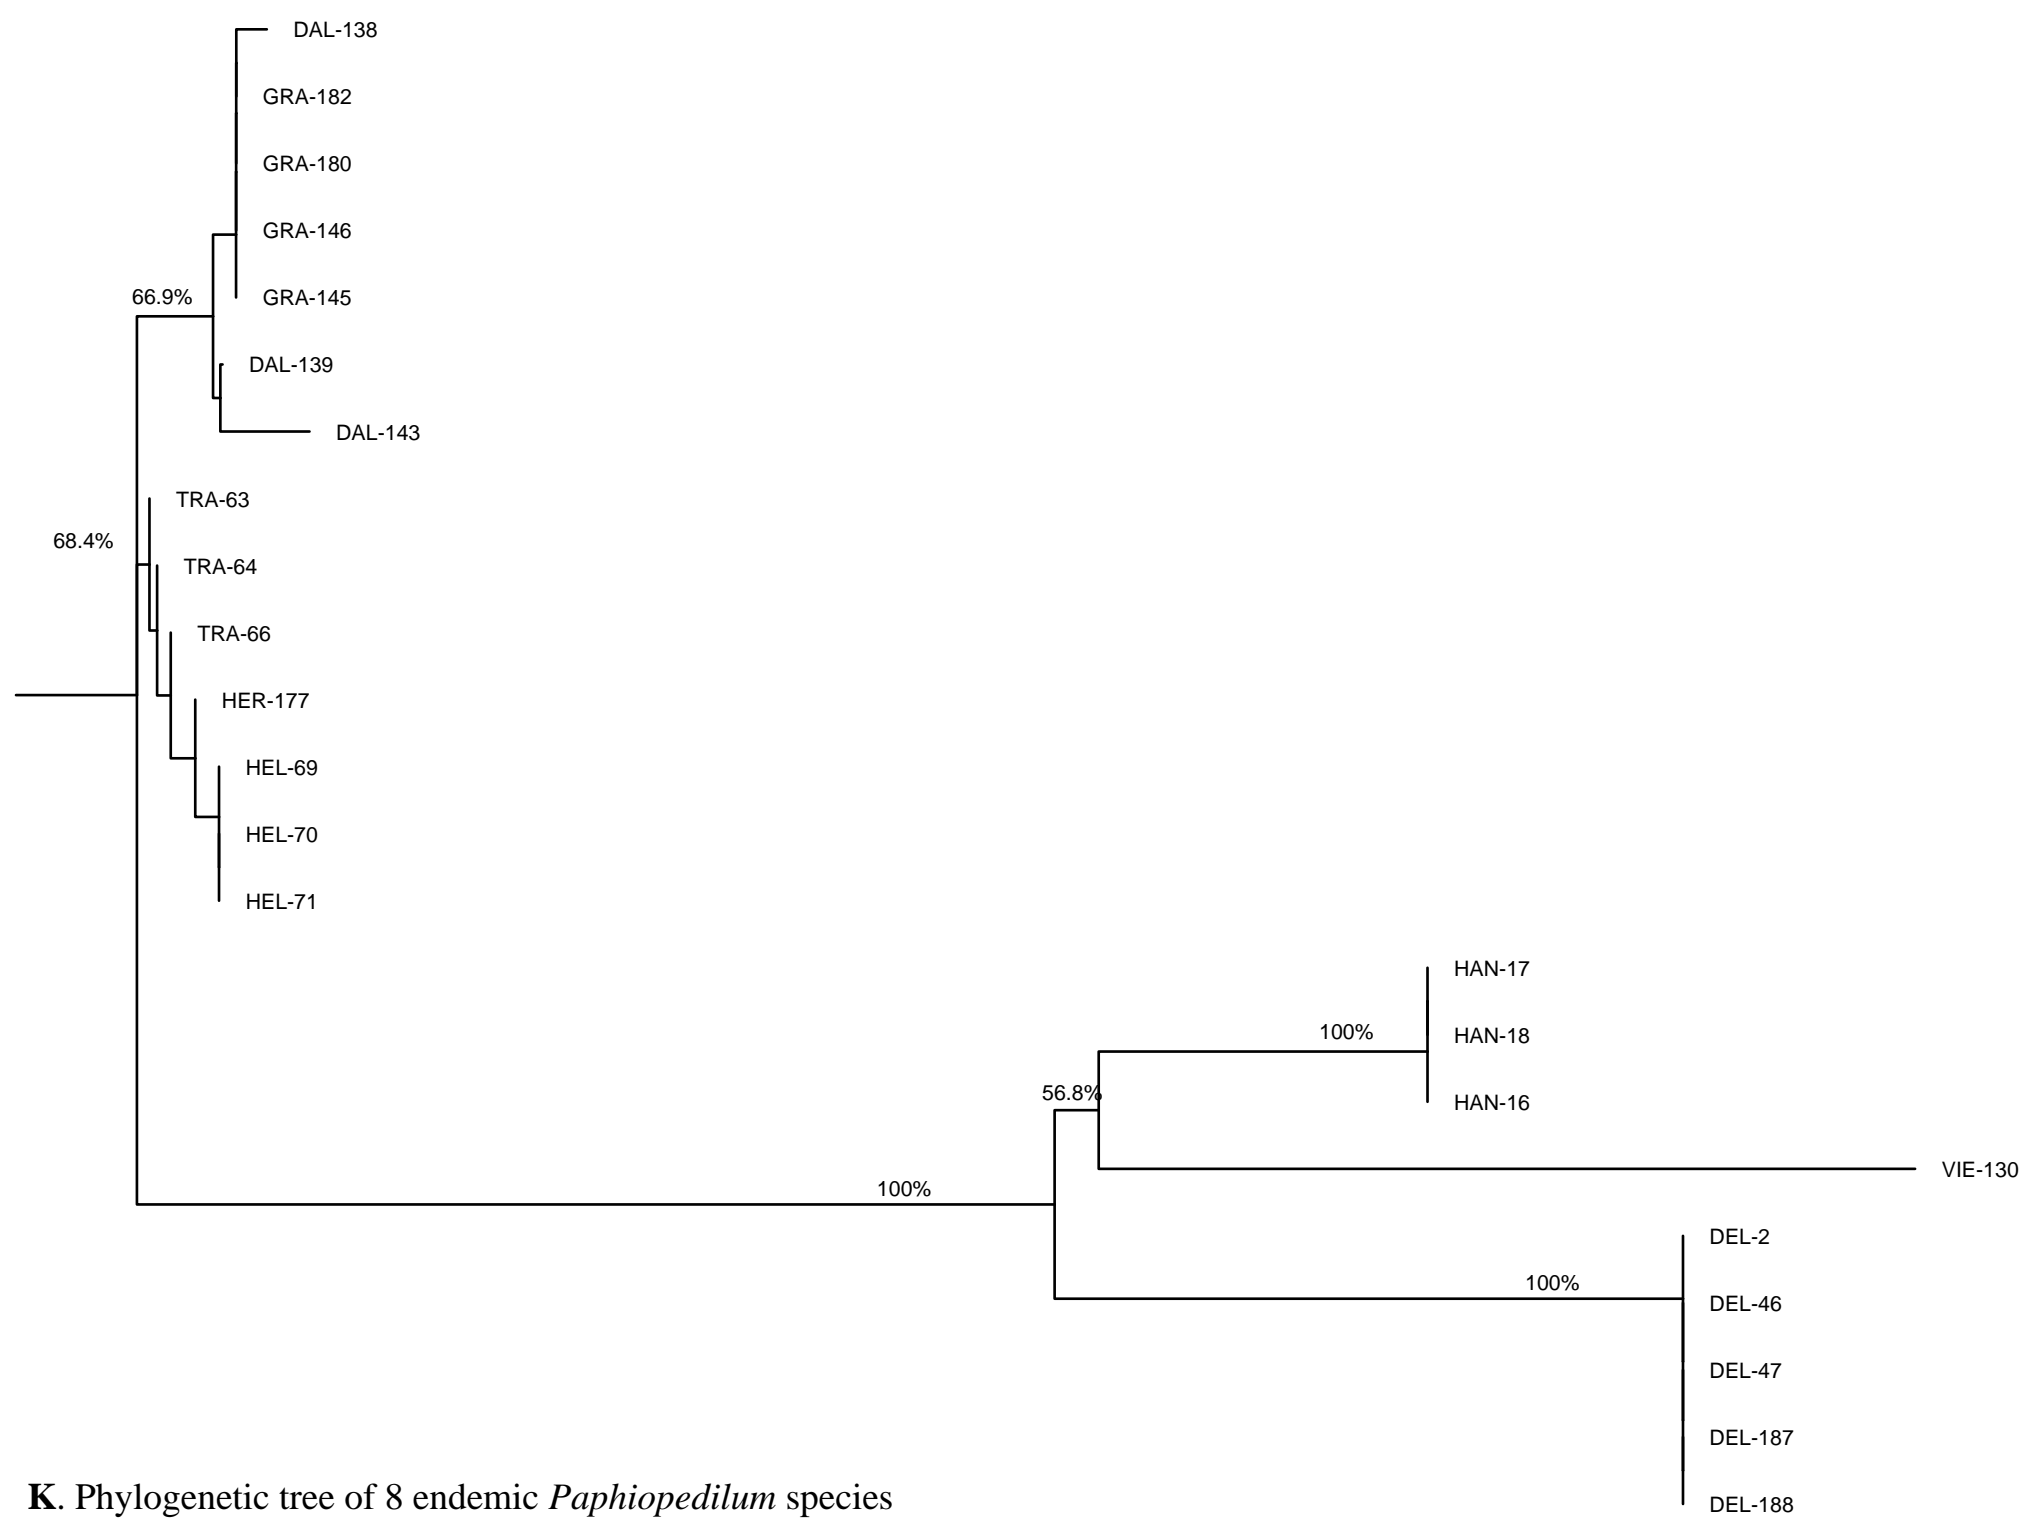

**K.** Phylogenetic tree of 8 endemic *Paphiopedilum* species based on combined ITS + *rpoB* locus

0.006

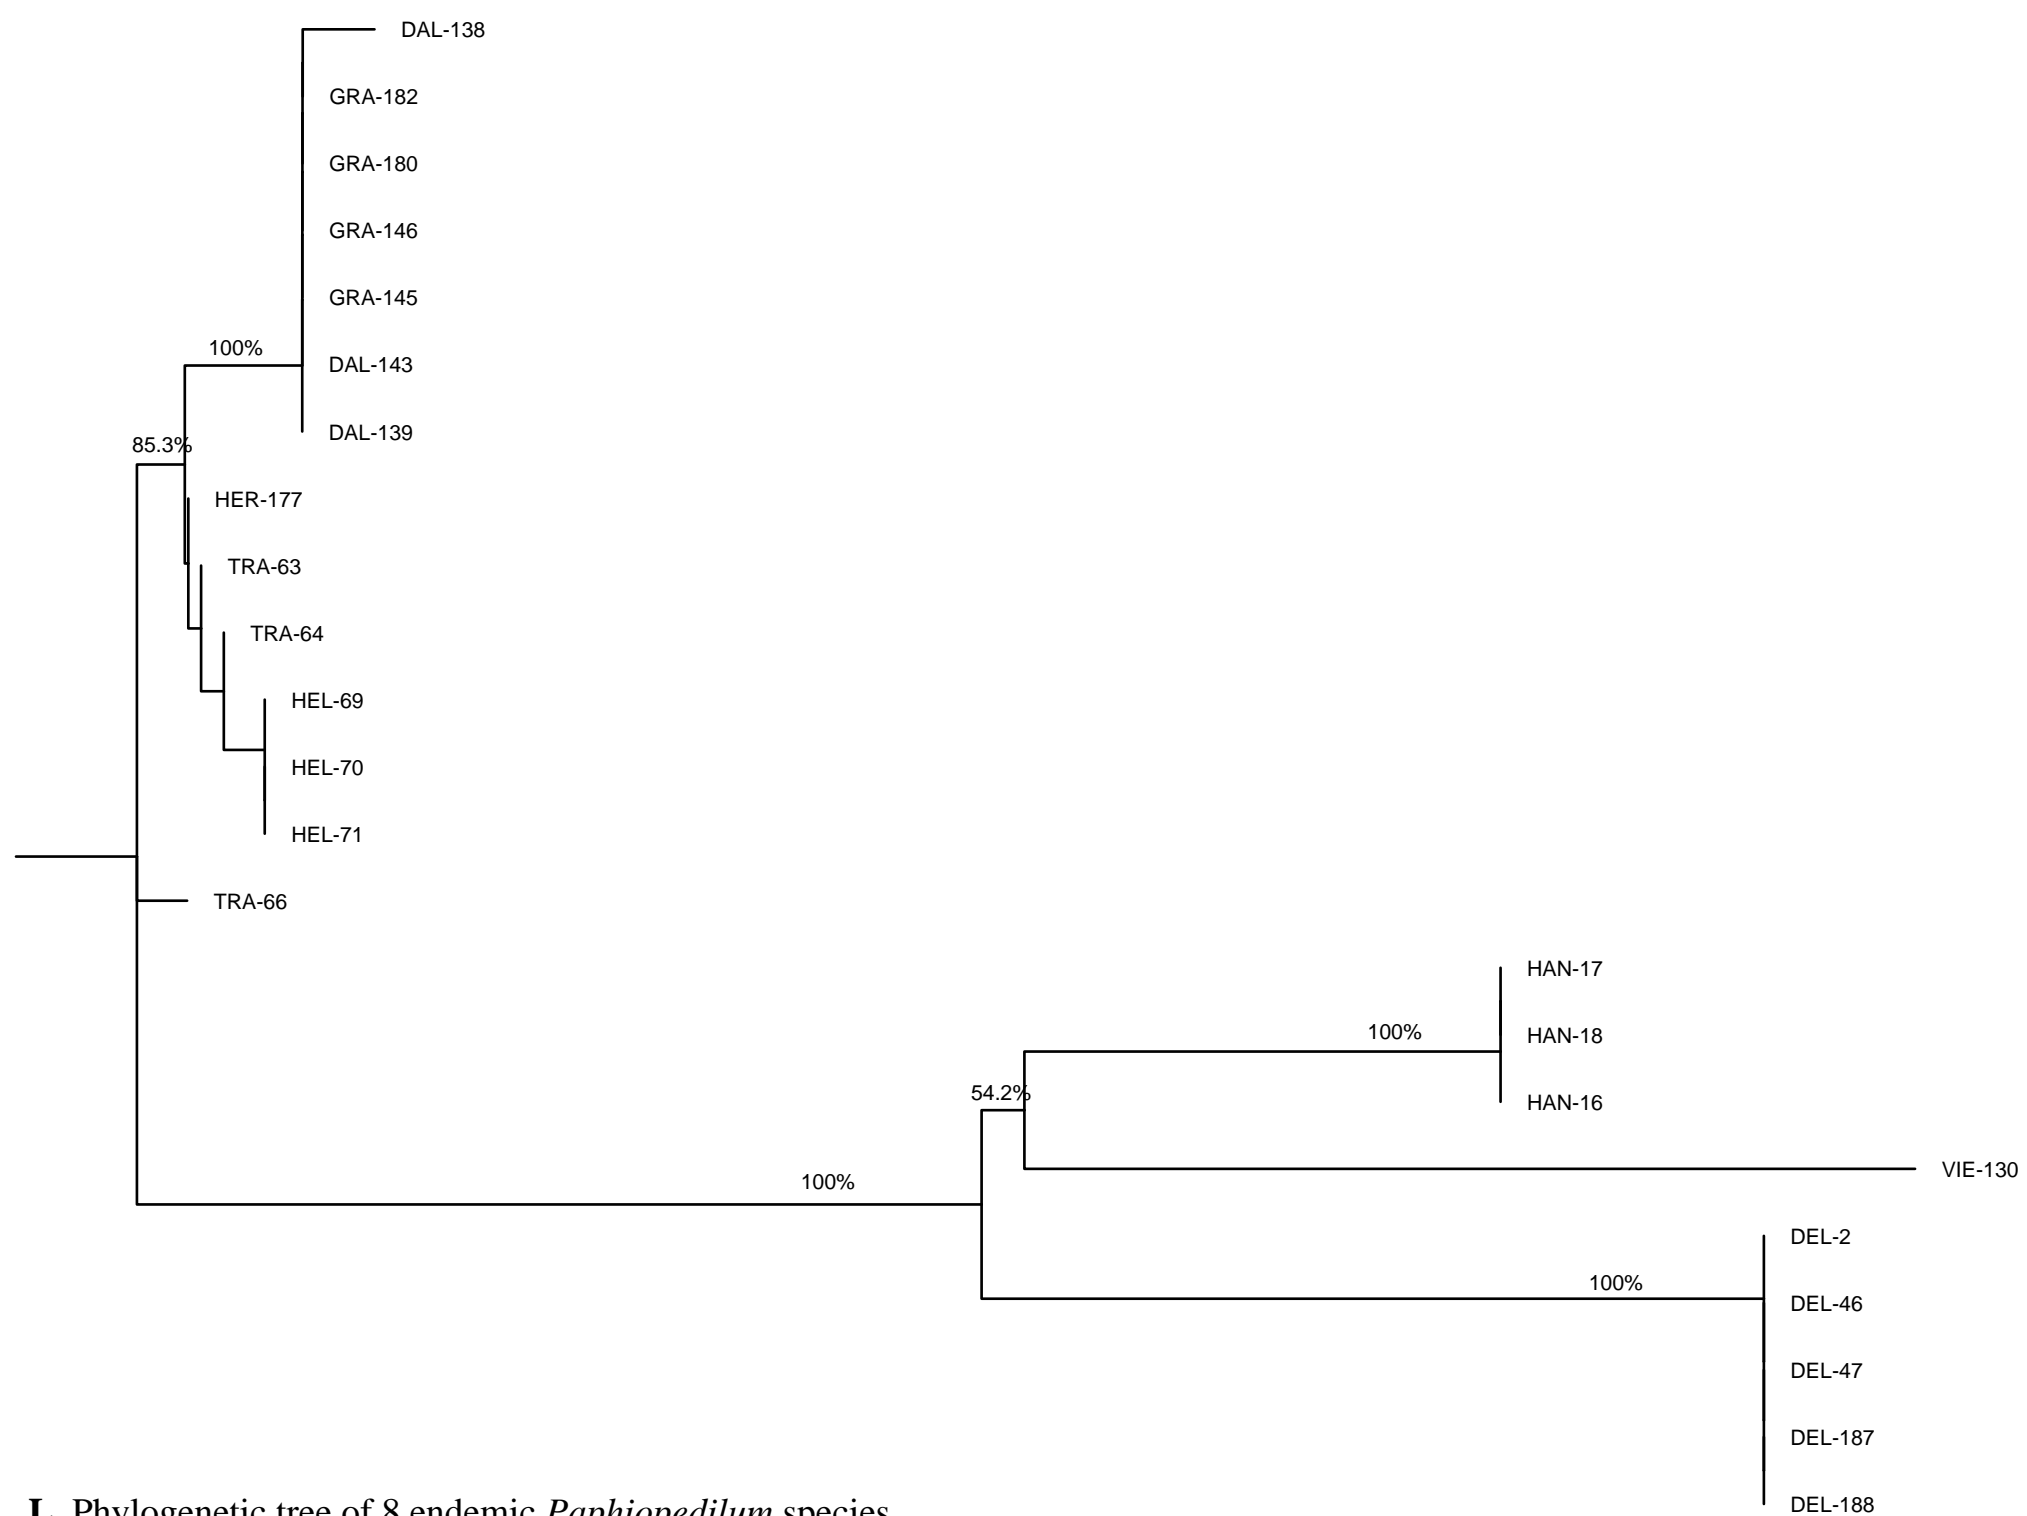

**L.** Phylogenetic tree of 8 endemic *Paphiopedilum* species based on combined ITS + *rpoC1* locus

0.005
