# Supplementary material for: Genetic Diversity and Identification of Vietnamese Paphiopedilum Species Using DNA Sequences
Source: MDPI journal article supplement (doi:10.3390/biology9010009), 2019-12-31
Supplement: s1 [file s1]

**Figure S2.** Estimates of evolutionary divergence between sequences of 8 endemic *Paphiopedilum* species based on 5 single sequences ITS, *matK*, *trnL*, *rpoB*, *rpoC1*

[illegible]

(Numbers of the first horizontal line were corresponding to numbers of the first vertical column that represent studied samples.

Numbers inside were estimated genetic distance between pairs of samples.

min: minimum genetic distance of matrix  
max: maximum genetic distance of matrix  
average: average genetic distance of matrix)

| matk matrix |         | 1     | 2     | 3     | 4     | 5     | 6     | 7     | 8     | 9     | 10    | 11    | 12    | 13    | 14    | 15    | 16    | 17    | 18    | 19    | 20    | 21    | 22    | 23    |
|-------------|---------|-------|-------|-------|-------|-------|-------|-------|-------|-------|-------|-------|-------|-------|-------|-------|-------|-------|-------|-------|-------|-------|-------|-------|
| 1           | DEL-2   |       |       |       |       |       |       |       |       |       |       |       |       |       |       |       |       |       |       |       |       |       |       |       |
| 2           | DEL-46  | 0.000 |       |       |       |       |       |       |       |       |       |       |       |       |       |       |       |       |       |       |       |       |       |       |
| 3           | DEL-47  | 0.000 | 0.000 |       |       |       |       |       |       |       |       |       |       |       |       |       |       |       |       |       |       |       |       |       |
| 4           | DEL-187 | 0.000 | 0.000 | 0.000 |       |       |       |       |       |       |       |       |       |       |       |       |       |       |       |       |       |       |       |       |
| 5           | DEL-188 | 0.000 | 0.000 | 0.000 | 0.000 |       |       |       |       |       |       |       |       |       |       |       |       |       |       |       |       |       |       |       |
| 6           | DAL-138 | 0.021 | 0.021 | 0.021 | 0.021 | 0.021 |       |       |       |       |       |       |       |       |       |       |       |       |       |       |       |       |       |       |
| 7           | DAL-139 | 0.021 | 0.021 | 0.021 | 0.021 | 0.021 | 0.000 |       |       |       |       |       |       |       |       |       |       |       |       |       |       |       |       |       |
| 8           | DAL-143 | 0.023 | 0.023 | 0.023 | 0.023 | 0.023 | 0.002 | 0.002 |       |       |       |       |       |       |       |       |       |       |       |       |       |       |       |       |
| 9           | GRA-145 | 0.019 | 0.019 | 0.019 | 0.019 | 0.019 | 0.005 | 0.005 | 0.007 |       |       |       |       |       |       |       |       |       |       |       |       |       |       |       |
| 10          | GRA-146 | 0.019 | 0.019 | 0.019 | 0.019 | 0.019 | 0.005 | 0.005 | 0.007 | 0.000 |       |       |       |       |       |       |       |       |       |       |       |       |       |       |
| 11          | GRA-180 | 0.019 | 0.019 | 0.019 | 0.019 | 0.019 | 0.005 | 0.005 | 0.007 | 0.000 | 0.000 |       |       |       |       |       |       |       |       |       |       |       |       |       |
| 12          | GRA-182 | 0.019 | 0.019 | 0.019 | 0.019 | 0.019 | 0.005 | 0.005 | 0.007 | 0.000 | 0.000 | 0.000 |       |       |       |       |       |       |       |       |       |       |       |       |
| 13          | HAN-16  | 0.012 | 0.012 | 0.012 | 0.012 | 0.012 | 0.030 | 0.030 | 0.031 | 0.028 | 0.028 | 0.028 | 0.028 |       |       |       |       |       |       |       |       |       |       |       |
| 14          | HAN-17  | 0.012 | 0.012 | 0.012 | 0.012 | 0.012 | 0.030 | 0.030 | 0.031 | 0.028 | 0.028 | 0.028 | 0.028 | 0.000 |       |       |       |       |       |       |       |       |       |       |
| 15          | HAN-18  | 0.012 | 0.012 | 0.012 | 0.012 | 0.012 | 0.030 | 0.030 | 0.031 | 0.028 | 0.028 | 0.028 | 0.028 | 0.000 | 0.000 |       |       |       |       |       |       |       |       |       |
| 16          | HEL-69  | 0.020 | 0.020 | 0.020 | 0.020 | 0.020 | 0.006 | 0.006 | 0.008 | 0.001 | 0.001 | 0.001 | 0.001 | 0.029 | 0.029 | 0.029 | 0.029 |       |       |       |       |       |       |       |
| 17          | HEL-70  | 0.020 | 0.020 | 0.020 | 0.020 | 0.020 | 0.006 | 0.006 | 0.008 | 0.001 | 0.001 | 0.001 | 0.001 | 0.029 | 0.029 | 0.029 | 0.029 | 0.000 |       |       |       |       |       |       |
| 18          | HEL-71  | 0.020 | 0.020 | 0.020 | 0.020 | 0.020 | 0.006 | 0.006 | 0.008 | 0.001 | 0.001 | 0.001 | 0.001 | 0.029 | 0.029 | 0.029 | 0.029 | 0.000 | 0.000 |       |       |       |       |       |
| 19          | HER-177 | 0.019 | 0.019 | 0.019 | 0.019 | 0.019 | 0.004 | 0.004 | 0.006 | 0.000 | 0.000 | 0.000 | 0.000 | 0.028 | 0.028 | 0.028 | 0.028 | 0.001 | 0.001 | 0.001 |       |       |       |       |
| 20          | TRA-63  | 0.019 | 0.019 | 0.019 | 0.019 | 0.019 | 0.005 | 0.005 | 0.007 | 0.000 | 0.000 | 0.000 | 0.000 | 0.028 | 0.028 | 0.028 | 0.028 | 0.001 | 0.001 | 0.001 | 0.000 |       |       |       |
| 21          | TRA-64  | 0.019 | 0.019 | 0.019 | 0.019 | 0.019 | 0.005 | 0.005 | 0.007 | 0.000 | 0.000 | 0.000 | 0.000 | 0.028 | 0.028 | 0.028 | 0.028 | 0.001 | 0.001 | 0.001 | 0.000 | 0.000 |       |       |
| 22          | TRA-66  | 0.019 | 0.019 | 0.019 | 0.019 | 0.019 | 0.005 | 0.005 | 0.007 | 0.000 | 0.000 | 0.000 | 0.000 | 0.028 | 0.028 | 0.028 | 0.028 | 0.001 | 0.001 | 0.001 | 0.000 | 0.000 | 0.000 |       |
| 23          | VIE-130 | 0.009 | 0.009 | 0.009 | 0.009 | 0.009 | 0.024 | 0.024 | 0.026 | 0.022 | 0.022 | 0.022 | 0.022 | 0.022 | 0.014 | 0.014 | 0.014 | 0.023 | 0.023 | 0.023 | 0.000 | 0.022 | 0.022 | 0.022 |

| trnl matrix |         | 1     | 2     | 3     | 4     | 5     | 6     | 7     | 8     | 9     | 10    | 11    | 12    | 13    | 14    | 15    | 16    | 17    | 18    | 19    | 20    | 21    | 22    | 23    |
|-------------|---------|-------|-------|-------|-------|-------|-------|-------|-------|-------|-------|-------|-------|-------|-------|-------|-------|-------|-------|-------|-------|-------|-------|-------|
| 1           | DEL-2   |       |       |       |       |       |       |       |       |       |       |       |       |       |       |       |       |       |       |       |       |       |       |       |
| 2           | DEL-46  | 0.000 |       |       |       |       |       |       |       |       |       |       |       |       |       |       |       |       |       |       |       |       |       |       |
| 3           | DEL-47  | 0.000 | 0.000 |       |       |       |       |       |       |       |       |       |       |       |       |       |       |       |       |       |       |       |       |       |
| 4           | DEL-187 | 0.000 | 0.000 | 0.000 |       |       |       |       |       |       |       |       |       |       |       |       |       |       |       |       |       |       |       |       |
| 5           | DEL-188 | 0.000 | 0.000 | 0.000 | 0.000 |       |       |       |       |       |       |       |       |       |       |       |       |       |       |       |       |       |       |       |
| 6           | DAL-138 | 0.029 | 0.029 | 0.029 | 0.029 | 0.029 |       |       |       |       |       |       |       |       |       |       |       |       |       |       |       |       |       |       |
| 7           | DAL-139 | 0.029 | 0.029 | 0.029 | 0.029 | 0.029 | 0.000 |       |       |       |       |       |       |       |       |       |       |       |       |       |       |       |       |       |
| 8           | DAL-143 | 0.029 | 0.029 | 0.029 | 0.029 | 0.029 | 0.005 | 0.005 |       |       |       |       |       |       |       |       |       |       |       |       |       |       |       |       |
| 9           | GRA-145 | 0.032 | 0.032 | 0.032 | 0.032 | 0.032 | 0.007 | 0.007 | 0.007 |       |       |       |       |       |       |       |       |       |       |       |       |       |       |       |
| 10          | GRA-146 | 0.029 | 0.029 | 0.029 | 0.029 | 0.029 | 0.005 | 0.005 | 0.005 | 0.002 |       |       |       |       |       |       |       |       |       |       |       |       |       |       |
| 11          | GRA-180 | 0.029 | 0.029 | 0.029 | 0.029 | 0.029 | 0.005 | 0.005 | 0.005 | 0.002 | 0.000 |       |       |       |       |       |       |       |       |       |       |       |       |       |
| 12          | GRA-182 | 0.029 | 0.029 | 0.029 | 0.029 | 0.029 | 0.005 | 0.005 | 0.005 | 0.002 | 0.000 | 0.000 |       |       |       |       |       |       |       |       |       |       |       |       |
| 13          | HAN-16  | 0.017 | 0.017 | 0.017 | 0.017 | 0.017 | 0.029 | 0.029 | 0.029 | 0.032 | 0.029 | 0.029 | 0.029 |       |       |       |       |       |       |       |       |       |       |       |
| 14          | HAN-17  | 0.017 | 0.017 | 0.017 | 0.017 | 0.017 | 0.029 | 0.029 | 0.029 | 0.032 | 0.029 | 0.029 | 0.029 | 0.000 |       |       |       |       |       |       |       |       |       |       |
| 15          | HAN-18  | 0.017 | 0.017 | 0.017 | 0.017 | 0.017 | 0.029 | 0.029 | 0.029 | 0.032 | 0.029 | 0.029 | 0.029 | 0.000 | 0.000 |       |       |       |       |       |       |       |       |       |
| 16          | HEL-69  | 0.029 | 0.029 | 0.029 | 0.029 | 0.029 | 0.005 | 0.005 | 0.005 | 0.002 | 0.000 | 0.000 | 0.000 | 0.029 | 0.029 | 0.029 |       |       |       |       |       |       |       |       |
| 17          | HEL-70  | 0.029 | 0.029 | 0.029 | 0.029 | 0.029 | 0.005 | 0.005 | 0.005 | 0.002 | 0.000 | 0.000 | 0.000 | 0.029 | 0.029 | 0.029 | 0.000 |       |       |       |       |       |       |       |
| 18          | HEL-71  | 0.029 | 0.029 | 0.029 | 0.029 | 0.029 | 0.005 | 0.005 | 0.005 | 0.002 | 0.000 | 0.000 | 0.000 | 0.029 | 0.029 | 0.029 | 0.000 | 0.000 |       |       |       |       |       |       |
| 19          | HER-177 | 0.029 | 0.029 | 0.029 | 0.029 | 0.029 | 0.005 | 0.005 | 0.005 | 0.002 | 0.000 | 0.000 | 0.000 | 0.029 | 0.029 | 0.029 | 0.000 | 0.000 | 0.000 |       |       |       |       |       |
| 20          | TRA-63  | 0.029 | 0.029 | 0.029 | 0.029 | 0.029 | 0.005 | 0.005 | 0.005 | 0.002 | 0.000 | 0.000 | 0.000 | 0.029 | 0.029 | 0.029 | 0.000 | 0.000 | 0.000 | 0.000 |       |       |       |       |
| 21          | TRA-64  | 0.029 | 0.029 | 0.029 | 0.029 | 0.029 | 0.005 | 0.005 | 0.005 | 0.002 | 0.000 | 0.000 | 0.000 | 0.029 | 0.029 | 0.029 | 0.000 | 0.000 | 0.000 | 0.000 | 0.000 |       |       |       |
| 22          | TRA-66  | 0.029 | 0.029 | 0.029 | 0.029 | 0.029 | 0.005 | 0.005 | 0.005 | 0.002 | 0.000 | 0.000 | 0.000 | 0.029 | 0.029 | 0.029 | 0.000 | 0.000 | 0.000 | 0.000 | 0.000 | 0.000 |       |       |
| 23          | VIE-130 | 0.005 | 0.005 | 0.005 | 0.005 | 0.005 | 0.024 | 0.024 | 0.024 | 0.027 | 0.024 | 0.024 | 0.024 | 0.012 | 0.012 | 0.012 | 0.024 | 0.024 | 0.024 | 0.024 | 0.024 | 0.024 | 0.024 | 0.024 |

| rpoB matrix |         | 1     | 2     | 3     | 4     | 5     | 6     | 7     | 8     | 9     | 10    | 11    | 12    | 13    | 14    | 15    | 16    | 17    | 18    | 19    | 20    | 21    | 22    | 23 |
|-------------|---------|-------|-------|-------|-------|-------|-------|-------|-------|-------|-------|-------|-------|-------|-------|-------|-------|-------|-------|-------|-------|-------|-------|----|
| 1           | DEL-2   |       |       |       |       |       |       |       |       |       |       |       |       |       |       |       |       |       |       |       |       |       |       |    |
| 2           | DEL-46  | 0.000 |       |       |       |       |       |       |       |       |       |       |       |       |       |       |       |       |       |       |       |       |       |    |
| 3           | DEL-47  | 0.000 | 0.000 |       |       |       |       |       |       |       |       |       |       |       |       |       |       |       |       |       |       |       |       |    |
| 4           | DEL-187 | 0.000 | 0.000 | 0.000 |       |       |       |       |       |       |       |       |       |       |       |       |       |       |       |       |       |       |       |    |
| 5           | DEL-188 | 0.000 | 0.000 | 0.000 | 0.000 |       |       |       |       |       |       |       |       |       |       |       |       |       |       |       |       |       |       |    |
| 6           | DAL-138 | 0.016 | 0.016 | 0.016 | 0.016 | 0.016 |       |       |       |       |       |       |       |       |       |       |       |       |       |       |       |       |       |    |
| 7           | DAL-139 | 0.012 | 0.012 | 0.012 | 0.012 | 0.012 | 0.004 |       |       |       |       |       |       |       |       |       |       |       |       |       |       |       |       |    |
| 8           | DAL-143 | 0.014 | 0.014 | 0.014 | 0.014 | 0.014 | 0.010 | 0.006 |       |       |       |       |       |       |       |       |       |       |       |       |       |       |       |    |
| 9           | GRA-145 | 0.014 | 0.014 | 0.014 | 0.014 | 0.014 | 0.002 | 0.002 | 0.008 |       |       |       |       |       |       |       |       |       |       |       |       |       |       |    |
| 10          | GRA-146 | 0.014 | 0.014 | 0.014 | 0.014 | 0.014 | 0.002 | 0.002 | 0.008 | 0.000 |       |       |       |       |       |       |       |       |       |       |       |       |       |    |
| 11          | GRA-180 | 0.014 | 0.014 | 0.014 | 0.014 | 0.014 | 0.002 | 0.002 | 0.008 | 0.000 | 0.000 |       |       |       |       |       |       |       |       |       |       |       |       |    |
| 12          | GRA-182 | 0.014 | 0.014 | 0.014 | 0.014 | 0.014 | 0.002 | 0.002 | 0.008 | 0.000 | 0.000 | 0.000 |       |       |       |       |       |       |       |       |       |       |       |    |
| 13          | HAN-16  | 0.002 | 0.002 | 0.002 | 0.002 | 0.002 | 0.014 | 0.010 | 0.012 | 0.012 | 0.012 | 0.012 | 0.012 |       |       |       |       |       |       |       |       |       |       |    |
| 14          | HAN-17  | 0.002 | 0.002 | 0.002 | 0.002 | 0.002 | 0.014 | 0.010 | 0.012 | 0.012 | 0.012 | 0.012 | 0.012 | 0.000 |       |       |       |       |       |       |       |       |       |    |
| 15          | HAN-18  | 0.002 | 0.002 | 0.002 | 0.002 | 0.002 | 0.014 | 0.010 | 0.012 | 0.012 | 0.012 | 0.012 | 0.012 | 0.000 | 0.000 |       |       |       |       |       |       |       |       |    |
| 16          | HEL-69  | 0.014 | 0.014 | 0.014 | 0.014 | 0.014 | 0.002 | 0.002 | 0.008 | 0.000 | 0.000 | 0.000 | 0.000 | 0.012 | 0.012 | 0.012 |       |       |       |       |       |       |       |    |
| 17          | HEL-70  | 0.014 | 0.014 | 0.014 | 0.014 | 0.014 | 0.002 | 0.002 | 0.008 | 0.000 | 0.000 | 0.000 | 0.000 | 0.012 | 0.012 | 0.012 | 0.000 |       |       |       |       |       |       |    |
| 18          | HEL-71  | 0.014 | 0.014 | 0.014 | 0.014 | 0.014 | 0.002 | 0.002 | 0.008 | 0.000 | 0.000 | 0.000 | 0.000 | 0.012 | 0.012 | 0.012 | 0.000 | 0.000 |       |       |       |       |       |    |
| 19          | HER-177 | 0.016 | 0.016 | 0.016 | 0.016 | 0.016 | 0.003 | 0.003 | 0.011 | 0.000 | 0.000 | 0.000 | 0.000 | 0.013 | 0.013 | 0.013 | 0.000 | 0.000 | 0.000 |       |       |       |       |    |
| 20          | TRA-63  | 0.014 | 0.014 | 0.014 | 0.014 | 0.014 | 0.002 | 0.002 | 0.008 | 0.000 | 0.000 | 0.000 | 0.000 | 0.012 | 0.012 | 0.012 | 0.000 | 0.000 | 0.000 | 0.000 |       |       |       |    |
| 21          | TRA-64  | 0.014 | 0.014 | 0.014 | 0.014 | 0.014 | 0.002 | 0.002 | 0.008 | 0.000 | 0.000 | 0.000 | 0.000 | 0.012 | 0.012 | 0.012 | 0.000 | 0.000 | 0.000 | 0.000 | 0.000 |       |       |    |
| 22          | TRA-66  | 0.014 | 0.014 | 0.014 | 0.014 | 0.014 | 0.002 | 0.002 | 0.008 | 0.000 | 0.000 | 0.000 | 0.000 | 0.012 | 0.012 | 0.012 | 0.000 | 0.000 | 0.000 | 0.000 | 0.000 | 0.000 |       |    |
| 23          | VIE-130 | 0.006 | 0.006 | 0.006 | 0.006 | 0.006 | 0.019 | 0.015 | 0.017 | 0.017 | 0.017 | 0.017 | 0.017 | 0.004 | 0.004 | 0.004 | 0.017 | 0.017 | 0.017 | 0.000 | 0.017 | 0.017 | 0.017 |    |

| rpoC1 matrix |         | 1                                                                                                         | 2     | 3     | 4     | 5     | 6     | 7     | 8     | 9     | 10    | 11    | 12    | 13    | 14    | 15    | 16    | 17    | 18    | 19    | 20    | 21    | 22    | 23    |
|--------------|---------|-----------------------------------------------------------------------------------------------------------|-------|-------|-------|-------|-------|-------|-------|-------|-------|-------|-------|-------|-------|-------|-------|-------|-------|-------|-------|-------|-------|-------|
| 1            | DEL-2   |                                                                                                           |       |       |       |       |       |       |       |       |       |       |       |       |       |       |       |       |       |       |       |       |       |       |
| 2            | DEL-46  | 0.000                                                                                                     |       |       |       |       |       |       |       |       |       |       |       |       |       |       |       |       |       |       |       |       |       |       |
| 3            | DEL-47  | 0.000                                                                                                     | 0.000 |       |       |       |       |       |       |       |       |       |       |       |       |       |       |       |       |       |       |       |       |       |
| 4            | DEL-187 | 0.000                                                                                                     | 0.000 | 0.000 |       |       |       |       |       |       |       |       |       |       |       |       |       |       |       |       |       |       |       |       |
| 5            | DEL-188 | 0.000                                                                                                     | 0.000 | 0.000 | 0.000 |       |       |       |       |       |       |       |       |       |       |       |       |       |       |       |       |       |       |       |
| 6            | DAL-138 | 0.011                                                                                                     | 0.011 | 0.011 | 0.011 | 0.011 |       |       |       |       |       |       |       |       |       |       |       |       |       |       |       |       |       |       |
| 7            | DAL-139 | 0.007                                                                                                     | 0.007 | 0.007 | 0.007 | 0.007 | 0.004 |       |       |       |       |       |       |       |       |       |       |       |       |       |       |       |       |       |
| 8            | DAL-143 | 0.007                                                                                                     | 0.007 | 0.007 | 0.007 | 0.007 | 0.004 | 0.000 |       |       |       |       |       |       |       |       |       |       |       |       |       |       |       |       |
| 9            | GRA-145 | 0.007                                                                                                     | 0.007 | 0.007 | 0.007 | 0.007 | 0.004 | 0.000 | 0.000 |       |       |       |       |       |       |       |       |       |       |       |       |       |       |       |
| 10           | GRA-146 | 0.007                                                                                                     | 0.007 | 0.007 | 0.007 | 0.007 | 0.004 | 0.000 | 0.000 | 0.000 |       |       |       |       |       |       |       |       |       |       |       |       |       |       |
| 11           | GRA-180 | 0.007                                                                                                     | 0.007 | 0.007 | 0.007 | 0.007 | 0.004 | 0.000 | 0.000 | 0.000 | 0.000 |       |       |       |       |       |       |       |       |       |       |       |       |       |
| 12           | GRA-182 | 0.007                                                                                                     | 0.007 | 0.007 | 0.007 | 0.007 | 0.004 | 0.000 | 0.000 | 0.000 | 0.000 | 0.000 |       |       |       |       |       |       |       |       |       |       |       |       |
| 13           | HAN-16  | 0.009                                                                                                     | 0.009 | 0.009 | 0.009 | 0.009 | 0.011 | 0.007 | 0.007 | 0.007 | 0.007 | 0.007 | 0.007 |       |       |       |       |       |       |       |       |       |       |       |
| 14           | HAN-17  | 0.009                                                                                                     | 0.009 | 0.009 | 0.009 | 0.009 | 0.011 | 0.007 | 0.007 | 0.007 | 0.007 | 0.007 | 0.007 | 0.000 |       |       |       |       |       |       |       |       |       |       |
| 15           | HAN-18  | 0.009                                                                                                     | 0.009 | 0.009 | 0.009 | 0.009 | 0.011 | 0.007 | 0.007 | 0.007 | 0.007 | 0.007 | 0.007 | 0.000 | 0.000 |       |       |       |       |       |       |       |       |       |
| 16           | HEL-69  | 0.007                                                                                                     | 0.007 | 0.007 | 0.007 | 0.007 | 0.004 | 0.000 | 0.000 | 0.000 | 0.000 | 0.000 | 0.000 | 0.007 | 0.007 | 0.007 |       |       |       |       |       |       |       |       |
| 17           | HEL-70  | 0.007                                                                                                     | 0.007 | 0.007 | 0.007 | 0.007 | 0.004 | 0.000 | 0.000 | 0.000 | 0.000 | 0.000 | 0.000 | 0.007 | 0.007 | 0.007 | 0.000 |       |       |       |       |       |       |       |
| 18           | HEL-71  | 0.007                                                                                                     | 0.007 | 0.007 | 0.007 | 0.007 | 0.004 | 0.000 | 0.000 | 0.000 | 0.000 | 0.000 | 0.000 | 0.007 | 0.007 | 0.007 | 0.000 | 0.000 |       |       |       |       |       |       |
| 19           | HER-177 | 0.007                                                                                                     | 0.007 | 0.007 | 0.007 | 0.007 | 0.004 | 0.000 | 0.000 | 0.000 | 0.000 | 0.000 | 0.000 | 0.007 | 0.007 | 0.007 | 0.000 | 0.000 | 0.000 |       |       |       |       |       |
| 20           | TRA-63  | 0.007                                                                                                     | 0.007 | 0.007 | 0.007 | 0.007 | 0.004 | 0.000 | 0.000 | 0.000 | 0.000 | 0.000 | 0.000 | 0.007 | 0.007 | 0.007 | 0.000 | 0.000 | 0.000 | 0.000 |       |       |       |       |
| 21           | TRA-64  | 0.007                                                                                                     | 0.007 | 0.007 | 0.007 | 0.007 | 0.004 | 0.000 | 0.000 | 0.000 | 0.000 | 0.000 | 0.000 | 0.007 | 0.007 | 0.007 | 0.000 | 0.000 | 0.000 | 0.000 | 0.000 |       |       |       |
| 22           | TRA-66  | 0.009                                                                                                     | 0.009 | 0.009 | 0.009 | 0.009 | 0.011 | 0.007 | 0.007 | 0.007 | 0.007 | 0.007 | 0.007 | 0.004 | 0.004 | 0.004 | 0.007 | 0.007 | 0.007 | 0.007 | 0.007 | 0.007 |       |       |
| 23           | VIE-130 | 0.007                                                                                                     | 0.007 | 0.007 | 0.007 | 0.007 | 0.009 | 0.004 | 0.004 | 0.004 | 0.004 | 0.004 | 0.004 | 0.007 | 0.007 | 0.007 | 0.004 | 0.004 | 0.004 | 0.004 | 0.004 | 0.004 | 0.004 | 0.007 |
|              |         | <div><div>min</div><div>max</div><div>average</div><div>0.000</div><div>0.011</div><div>0.005</div></div> |       |       |       |       |       |       |       |       |       |       |       |       |       |       |       |       |       |       |       |       |       |       |
