# Supplementary material for: Genetic Diversity and Identification of Vietnamese Paphiopedilum Species Using DNA Sequences
Source: Biology (Basel). 2019 Dec 31;9(1):9. doi: 10.3390/biology9010009 (PMC7168009; doi:10.3390/biology9010009)
Supplement: Supplementary file 1 [file biology-09-00009-s001.zip › Supplement Table S1.xlsx]

## Sheet: S1- Vietnam Paphiopedilum
Table S1. Full scientific name, vernacular name, distribution areas, IUCN Red List state and endemic list of Vietnamse Paphiopedilum species
No.	Scientific name	Origins	Vernacular name	Distribution areas	IUCN Red list version 2019-2	Endemic species
1	Paphiopedilum appletonianum (Gower) Rolfe 1896	Averyanov et al. (2004) [1]	Hài táo, Hài đài cuốn, Vệ hài đài trắng, Hài cánh sen, Hài Thái	Daklak, Khanh Hoa (Hon Giao mountain), Kon Tum, Lam Dong, Ninh Thuan, Thua Thien Hue (Bach Ma mountain), Da Nang	Endangered
2	Paphiopedilum callosum (Rchb. f.) Pfitzer 1895	Averyanov et al. (2004) [1]	Hài vân nam, Vân hài	Gia Lai, Lam Dong, Quang Nam, Quang Tri, Thua Thien Hue	Endangered	The rare species of Vietnam
3	Paphiopedilum coccineum Perner & R. Herrm. 2000; or Paphiopedilum barbigerum var. coccineum (Perner & R. Herrm.) Cavestro 2001 or Paphiopedilum barbigerum var. lockianum Aver. 2002	Averyanov et al. (2004) [1]	Hài đỏ son, Hài chân tím	Cao Bang, Son La, Hoa Binh (Mai Chau)	Endangered
4	Paphiopedilum concolor (Bateman) Pfitzer 1888	Averyanov et al. (2004) [1]	Hài gấm, Hài đốm, Hài Gia Định, Vạn điểm hài, Hài mỏ giầy	Hai Phong, Bac Kan, Bac Giang, Ha Nam, Lang Son, Nam Dinh, Ninh Binh, Quang Ninh, Son La, Thai Nguyen, Vinh Phuc	Endangered
5	Paphiopedilum delenatii Guillaum 1924	Averyanov et al. (2004) [1]	Hài hồng, Hài đỏ, Vệ hài Delenat	Daklak, Gia Lai (Chu Pah mountain), Khanh Hoa (Hon Giao mountain), Lam Dong (Bidup mountain), Ninh Thuan, Phú Yen	Critical Endangered	The valuable gene source and the endemic species of Vietnam
6	Paphiopedilum emersonii KooPaphiopedilum & P.J. Cribb 1986	Averyanov et al. (2004) [1]	Hài hương, Hài hương lan, Hài emerson, Hài ngọc điểm, Hài trắng	Tuyen Quang, Lang Son, Thai Nguyen, Vinh Phuc, Bac Kan	Critical Endangered	The rare species of Vietnam
7	Paphiopedilum gratrixianum (Mast.) Guillaumin 1924	Averyanov et al. (2004) [1]	Hài đuôi công, Hài Tam Đảo, Vệ hài cánh vàng, Hài lục, Vệ hài Gratrix	Lao Cai, Lai Chau, Vinh Phuc (Tam Dao), Thai Nguyen	Critical Endangered	The valuable gene source and endemic species of the Indochina
8	Paphiopedilum hangianum Perner & Gruss 1999	Averyanov et al. (2004) [1]	Hài hằng	Tuyen Quang, Ha Giang, Lang Son	Critical Endangered	The strait endemic species of Vietnam, extincted in nature
9	Paphiopedilum helenae Aver. 1996	Averyanov et al. (2004) [1]	Hài helen, Hài vàng, Hài lùn	Bac Kan, Cao Bang, Lang Son	Critical Endangered	The valuable and rare species of Vietnam
10	Paphiopedilum henryanum Braem 1987	Averyanov et al. (2004) [1]	Hài henry, Hài Bắc	Ha Giang	Critical Endangered
11	Paphiopedilum hirsutissimum var. esquirolei (Schltr.) Karasawa & Saito 1982	Averyanov et al. (2004) [1]	Hài lông, Tiên hài, Hài vệ nữ	Cao Bang, Lang Son, Ha Giang, Hoa Binh, Son La, Lao Cai, Thai Nguye, Thanh Hoa	Vulnerable
12a	Paphiopedilum malipoense var. malipoense S.C. Chen & Tsi 1984	Averyanov et al. (2004) [1]	Hài ráp, Hài giáp, Hài mã lị, Hài xanh	Bac Kan, Ha Giang, Hoa Binh, Lang Son, Quang Ninh, Son La, Thanh Hoa, Tuyen Quang	Endangered
12b	Paphiopedilum malipoense var. jackii (H.S.Hua) Aver. 1997 or Paphiopedilum jackii H.S.Hua 1995	Averyanov et al. (2004) [1]	Hài jacki	Tuyen Quang (Na Hang), Bac Kan (Ba Be), Lang Son, Hoa Binh, Thanh Hoa, Son La (Moc Chau), Ha Giang, Cao Bang (Tra Linh mountain), Quang Binh	Deficiency Data
13	Paphiopedilum micranthum Tang & Wang 1951	Averyanov et al. (2004) [1]	Hài mốc hồng, Hài mạng đỏ tía, Lan hài mốc	Cao Bang, Ha Giang, Tuyen Quang	Critical Endangered
14	Paphiopedilum dianthum T. Tang & F.T.Wang 1940; or Paphiopedilum parishii var. dianthum (T. Tang & F.T. Wang) Karasaw & Saito 1982	Averyanov et al. (2004) [1]	Hài râu, Hài xoắn, Hài kép	Cao Bang, Ha Giang, Hoa Binh, Lai Chau, Lao Cai, Son La	Endangered
15	Paphiopedilum purpuratum (Lindley) Stein 1894	Averyanov et al. (2004) [1]	Hài thiết, Hài vân bắc, Hài tía	Cao Bang, Tuyen Quang, Lao Cai, Lam Dong	Critical Endangered
16	Paphiopedilum tranlienianum O. Gruss & H. Perner 1998	Averyanov et al. (2004) [1]	Hài Trần Liên, Hài chân tím	Cao Bang, Bac Kan, Thai Nguyen, Tuyen Quang	Critical Endangered	The local endemic species of Vietnam
17	Paphiopedilum vietnamense O. Gruss & Perner 1999	Averyanov et al. (2004) [1]	Hài Việt Nam, Hài bóng	Thai Nguyen	Critical Endangered	The strait endemic species of Vietnam, mostly extincted in nature
18	Paphiopedilum villosum (Lindl.) Stein, 1892	Averyanov et al. (2004) [1]	Hài kim, Hài vàng, Hài lông	Lai Chau, Lao Cai, Lam Dong, Khanh Hoa, Kon Tum	Vulnerable
19	Paphiopedilum x dalatense Averyanov 2002 (parents: P. callosum and P. villosum)	Averyanov et al. (2004) [1]	Hài Đà Lạt	Lam Dong	Deficiency Data	The valuable gene source and endemic species of Vietnam
20	Paphiopedilum x hermannii F. Fuchs & H. Reisinger 1995 (parents: P. hirsutissimum var. esquirolei and P. helenae)	Averyanov et al. (2004) [1]	Hài hecman	Cao Bang, Ha Giang	Deficiency Data	The endemic species of Vietnam, extincted in nature.
21	Paphiopedilum x affine De Wild. 1906 (parents: P. villosum va P. appletonianum)	Averyanov et al. (2004) [1]	-		Deficiency Data
22	Paphiopedilum x aspersum Aver. 2002 (parents: P. barbigerum var. lockianum and P. henryanum)	Averyanov et al. (2004) [1]	-	Son La, Moc Chau	Deficiency Data
23	Paphiopedilum canhii Aver. & O.Gruss 2010	Averyanov et al. (2010) [2]			Critical Endangered
24	Paphiopedilum armeniacum S.C. Chen & F.Y. Liu 1982	Following Vietnam Paphiopedilum (Period 1). Available online: https://www.thiennhien.net/2012/01/26/theo-dau-lan-hai-viet-nam-ky-1/ (accessed on 06/12/2019) [3]	Hài mốc vàng, Hài vàng, Hoàng hài	North mountains in Vietnamese-Chinese border areas	Endangered
