# Supplementary material for: Genetic Diversity and Identification of Vietnamese Paphiopedilum Species Using DNA Sequences
Source: Biology (Basel). 2019 Dec 31;9(1):9. doi: 10.3390/biology9010009 (PMC7168009; doi:10.3390/biology9010009)
Supplement: Supplementary file 1 [file biology-09-00009-s001.zip › Supplement Table S2.xlsx]

## Sheet: S2-Studied samples
Table S2. Specimen voucher, collected source and accession numbers of studied Paphiopedilum samples
No.	Scientific name	No. of samples	Specimen voucher	Collected source (see notes below)	GenBank accessions on studied loci
					ITS	matK	trnL	rpoB	rpoC1
1	Paphiopedilum appletonianum	6	APP_12	[1], Khanh Hoa	MK778683	MK792607	MK787329
			APP_122	[1], Lam Dong	MK778684	MK792608	MK787330
			APP_140	[1], Khanh Hoa	MK778685	MK792609	MK787331
			APP_142	[1], Kon Tum	MK778686	MK792610	MK787332
			APP_166	[2], called name P. callosum	MK778687	MK792611	MK787333
			APP_181	[1], Da Nang	MK778688	MK792612	MK787334
2	Paphiopedilum armeniacum	4	ARM_8	[1], Lai Chau	MK778689	MK792613	MK787335
			ARM_41	[2], called name P. armeniacum	MK778690	MK792614	MK787336
			ARN_42	[1], Lai Chau	MK778691	MK792615	MK787337
			ARM_141	[1], Lai Chau	MK778692	MK792616	MK787338
3	Paphiopedilum callosum	5	CAL_48	[1], Lam Dong	MK778693	MK792617	MK787339
			CAL_49	[1], Lam Dong	MK778694	MK792618	MK787340
			CAL_51	[1], Gia Lai	MK778695	MK792619	MK787341
			CAL_52	[1], Thua Thien Hue	-	MK792620	MK787342
			CAL_167	[1], Khanh Hoa	MK778696	MK792621	MK787343
4	Paphiopedilum coccineum	5	COC_36	[1], Cao Bang	MK778697	MK792622	MK787344
			COC_37	[1], Cao Bang	MK778698	MK792623	MK787345
			COC_38	[1], Son La	MK778699	MK792624	MK787346
			COC_150	[2], called name P. tranlienianum	MK778700	MK792625	MK787347
			COC_151	[2], called name P. tranlienianum	MK778701	MK792626	MK787348
5	Paphiopedilum concolor	4	CON_3	[1], Lang Son	MK778702	MK792627	MK787349
			CON_114	[1], Thai Nguyen	MK778703	MK792628	MK787350
			CON_115	[1], Vinh Phuc	MK778704	MK792629	MK787351
			CON_132	[2], called name P. concolor	MK778705	MK792630	MK787352
6	Paphiopedilum delenatii	7	DEL_2	[1], Lam Dong	MK778706	MK792631	MK787353	MK876160	MK792704
			DEL_46	[1], Khanh Hoa	MK778707	MK792632	MK787354	MK876161	MK792705
			DEL_47	[1], Lam Dong	MK778708	MK792633	MK787355	MK876162	MK792706
			DEL_187	[1], Dak Lak	MK778709	MK792636	MK787356	MK876163	MK792707
			DEL_188	[1], Ninh Thuan	MK778710	MK792634	MK787357	MK876164	MK792708
			DEL_189	[1], Gia Lai	MK778711	MK792635	MK787358
			DEL_158T	[2], the natural mutated taxon of P. delenatii, expressed white flowers	MK778712	MK792637	MK787359
7	Paphiopedilum dalatense	5	DAL_138	[1], Lam Dong	MK778713	MK792638	MK787360	MK876157	MK792701
			DAL_139	[1], Lam Dong	MK778714	MK792639	MK787361	MK876158	MK792702
			DAL_143	[1], Lam Dong	MK778715	MK792640	MK787362	MK876159	MK792703
			DAL_172	[1], Khanh Hoa	MK778717	MK792642	MK787364
			DAL_183	[1], Khanh Hoa	MK778718	MK792643	MK787365
8	Paphiopedilum emersonii	4	EME_4	[1], Thai Nguyen	MK778719	MK792644	MK787366
			EME_92	[1], Tuyen Quang	MK778720	MK792645	MK787367
			EME_93	[1], Lang Son	MK778721	MK792646	MK787368
			EME_103	[1], Bac Kan	MK778722	MK792647	MK787369
9	Paphiopedilum gratrixianum	4	GRA_145	[1], Vinh Phuc	MK778723	MK792648	MK787370	MK876165	MK792709
			GRA_146	[1], Lai Chau	MK778724	MK792649	MK787371	MK876166	MK792710
			GRA_180	[1], Lao Cai	MK778725	MK792650	MK787372	MK876167	MK792711
			GRA_182	[1], Thai Nguyen	MK778726	MK792651	MK787373	MK876168	MK792712
10	Paphiopedilum hangianum	5	HAN_16	[1], Ha Giang	MK778727	MK792652	MK787374	MK876169	MK792713
			HAN_17	[1], Vinh Phuc	MK778728	MK792653	MK787375	MK876170	MK792714
			HAN_18	[1], Tuyen Quang	MK778729	MK792654	MK787376	MK876171	MK792715
			HAN_19	[1], Tuyen Quang	MK778730	MK792655	MK787377
			HAN_20	[1], Lang Son	MK778731	MK792656	MK787378
11	Paphiopedilum helenae	7	HEL_69	[1], Cao Bang	MK778732	MK792657	MK787379	MK876172	MK792716
			HEL_70	[1], Cao Bang	MK778733	MK792658	MK787380	MK876173	MK792717
			HEL_71	[1], Lang Son	MK778734	MK792659	MK787381	MK876174	MK792718
			HEL_173	[1], Lang Son	MK778735	MK792660	MK787382
			HEL_174	[1], Lang Son	MK778736	MK792661	MK787383
			HEL_175	[1], Lang Son	MK778737	MK792662	MK787384
			HEL_176	[1], Bac Kan	MK778738	MK792663	MK787385
12	Paphiopedilum henryanum	3	HEN_11	[1], Ha Giang	MK778739	MK792664	MK787386
			HEN_54	[1], Ha Giang	MK778741	MK792665	MK787387
			HEN_55	[1], Cao Bang	MK778740	MK792666	MK787388
13	Paphiopedilum herrmannii	1	HER_177	[1], Cao Bang	MK778742	MK792667	MK787389	MK876176	MK792719
14	Paphiopedilum hirsutissimum	5	HIR_9	[1], Lao Cai	MK778743	MK792668	MK787390
			HIR_108	[1], Lao Cai	MK778744	MK792669	MK787391
			HIR_109	[1], Cao Bang	MK778745	MK792670	MK787392
			HIR_154	[1], Thai Nguyen	MK778746	MK792671	MK787393
			HIR_155	[1], Hoa Binh	MK778747	MK792672	MK787394
15a	Paphiopedilum malipoense var. malipoense	6	MAL_14	[1], Son La	MK778748	MK792673	MK787395
			MAL_15	[1], Thanh Hoa	MK778749	MK792674	MK787396
			MAL_161	[1], Ha Giang	MK778750	MK792675	MK787397
15b	Paphiopedilum malipoense var. jackii		JAC_13	[1], Cao Bang	MK778751	MK792676	MK787398
			JAC_26	[1], Cao Bang	MK778752	MK792677	MK787399
			JAC_28	[1], Son La	MK778753	MK792678	MK787400
16	Paphiopedilum micranthum	4	MIC_23	[1], Cao Bang	MK778754	MK792679	MK787401
			MIC_126	[1], Cao Bang	MK778755	MK792680	MK787402
			MIC_127	[1], Ha Giang	MK778756	MK792681	MK787403
			MIC_128	[1], Ha Giang	MK778757	MK792682	MK787404
17	Paphiopedilum dianthum	6	DIA_31	[1], Lai Chau	MK778758	MK792683	MK787405
			DIA_32	[1], Lai Chau	MK778759	MK792684	MK787406
			DIA_33	[1], Lao Cai	MK778760	MK792685	MK787407
			DIA_184	[1], Lai Chau	MK778761	MK792686	MK787408
			DIA_185	[1], Cao Bang	MK778762	MK792687	MK787409
			DIA_186	[1], Son La	MK778763	MK792688	MK787410
18	Paphiopedilum purpuratum	3	PUR_119	[1], Cao Bang	MK778764	MK792689	MK787411
			PUR_120	[1], Tuyen Quang	MK778765	MK792690	MK787412
			PUR_121	[1], Lam Dong	MK778766	MK792691	MK787413
19	Paphiopedilum tranlienianum	5	TRA_63	[1], Bac Kan	MK778767	MK792692	MK787414	MK876177	MK792720
			TRA_64	[1], Cao Bang	MK778769	MK792693	MK787415	MK876178	MK792721
			TRA_66	[1], 'Thai Nguyen	MK778768	MK792694	MK787416	MK876179	MK792722
			TRA_177	[2], called name P. tranlienianum	MK778770	MK792695	MK787417
			TRA_178	[2], called name P. tranlienianum	MK778771	MK792696	MK787418
20	Paphiopedilum vietnamense	2	VIE_129	[2], called name P. canhii	MK778773	MK787425	MK787419
			VIE_130	[1], Thai Nguyen	MK778772	MK787426	MK787420	MK876182	MK876183
21	Paphiopedilum villosum	4	VIL_152	[1], Khanh Hoa	MK778774	MK792697	MK787421
			VIL_153	[1], Lam Dong	MK778775	MK792698	MK787422
			VIL_118	[1], Kon Tum	MK778776	MK792699	MK787423
			VIL_170	[1], Lai Chau	MK778777	MK792700	MK787424
	Total	95								Notes
										[1] From Science Institutes of Vietnam
	Paphiopedilum canhii			available accessions from GenBank	JQ660880.1	JO660904.1				[2] From trading market
