# Supplementary material for: Genetic Diversity and Identification of Vietnamese Paphiopedilum Species Using DNA Sequences
Source: Biology (Basel). 2019 Dec 31;9(1):9. doi: 10.3390/biology9010009 (PMC7168009; doi:10.3390/biology9010009)
Supplement: Supplementary file 1 [file biology-09-00009-s001.zip › Supplement Table S3.xlsx]

## Sheet: S3-primer-ACO-LFY
Table S3. Primers for screening of ACO and LEAFY in the study
Locus	Primer name	Primer sequence	Reference
ACO	ACO-F1	5'-GTGAATGCBGCCTTCTCT-3'	Newly designed by our group (Dang et al., 2017)
	ACO-R1	5'-CAGCTTCATGTAGTCCTC-3'	Newly designed by our group (Dang et al., 2017)
	ACO-F2	5’-TCCCTGTTTCCAACATCTCC-3’	Newly designed by our group (Dang et al., 2017)
	ACO-R2	5’-GAGGCGATTGACATCCTGTT-3’	Newly designed by our group (Dang et al., 2017)
LEAFY	LFY-F1	5'-CACACCTTTCCCCTGATGAC-3'	Newly designed by our group (Dang et al., 2017)
	LFY-R1	5'-AGGAGGAACTCATGGCACTG-3'	Newly designed by our group (Dang et al., 2017)
	LFY-F2	5'-CGAAGCCCTCCTGTTTCAGT-3'	Newly designed by our group (Dang et al., 2017)
	LFY-R2	5'-GGACCGTGTGTTGACCATG-3'	Newly designed by our group (Dang et al., 2017)
