# Supplementary material for: Genetic Diversity and Identification of Vietnamese Paphiopedilum Species Using DNA Sequences
Source: Biology (Basel). 2019 Dec 31;9(1):9. doi: 10.3390/biology9010009 (PMC7168009; doi:10.3390/biology9010009)
Supplement: Supplementary file 1 [file biology-09-00009-s001.zip › Supplement Table S4.xlsx]

## Sheet: S4-Resolution-8-endemic
Table S4. Species resolution results on 8 Paphiopedilum endemic species (dataset I)
No.	Species	ITS	matK	trnL	rpoB	rpoC1	matK + ITS	matK + trnL	matK + rpoB	matK + rpoC1	ITS + trnL	ITS + rpoB	ITS + rpoC1
1	Paphiopedilum delenatii	+	+	+	+	+	+	+	+	+	+	+	+
2	Paphiopedilum x dalatense	─	+	─	─	─	+	+	+	+	─	─	─
3	Paphiopedilum gratrixianum	─	─	─	─	─	─	─	─	─	─	─	─
4	Paphiopedilum hangianum	+	+	+	+	+	+	+	+	+	+	+	+
5	Paphiopedilum helenea	─	+	─	─	─	+	+	+	+	─	─	─
6	Paphiopedilum x herrmannii	─	─	─	─	─	─	─	─	─	─	─	─
7	Paphiopedilum tranlienianum	─	─	─	─	─	+	─	─	─	─	─	─
8	Paphiopedilum vietnamense	+	+	+	+	+	+	+	+	+	+	+	+
Number of monophyletic species		3/8	5/8	3/8	3/8	3/8	6/8	5/8	5/8	5/8	3/8	3/8	3/8
Rate of distinguished species (%)		37.5	62.5	37.5	37.5	37.5	75	62.5	62.5	62.5	37.5	37.5	37.5
